# Supplementary material
Source: MDPI journal article supplement (https://www.mdpi.com/2076-3263/14/8/207)
Supplement: s1 [file s1]

## Sheet: Soil's Properties
Properties	Values	Unit(s)
Dry Density	1.654	gm/cm3
Bulk Density	1.73157	gm/cm3
Moisture Content	4.69	%
	0.077	m3/m3
Top plate temp	57.3	oC
Bottom plate temp	21.6	oC
Thermal Conductivity	0.9842	W/(m.K)
Heat Capacity	1.533	MJ/(m3.K)
Steady State Heat Flux	314.82	W/m2

## Sheet: Data from Heating Test
time	Heat Flux	At X distance from bottom plate					Thermal Conductivity, W/(m.K)					7 Points Average
		Temperature, oC										Thermal Conductivity, W/(m.K)
min	W/m2	10.0 cm	7.5 cm	5.0 cm	2.5 cm	0.0 cm	4th Layer	3rd Layer	2nd Layer	1st Layer	Equivalent	4th Layer	3rd Layer	2nd Layer	1st Layer	Equivalent
0	-119.64	23.27	22.033	21.877	22.06	23.38
1	-85.9171	25.0971	22.26	21.882	22.099	23.4729
2	-73.2714	27.1014	22.568	21.898	22.131	23.6629
3	-55.3386	29.0457	22.953	21.921	22.151	23.6486
4	-33.5886	31.0243	23.419	21.959	22.164	23.6186
5	-15.3257	33.1171	23.96	22.018	22.171	23.5543
6	2.92	35.18	24.557	22.088	22.16	23.48
7	23.9067	37.1733	25.212	22.175	22.13	23.3633
8	60.1114	39.16	25.914	22.271	22.077	23.1386
9	97.3443	41.1529	26.673	22.393	22.02	22.8271
10	121.247	43.2157	27.472	22.528	21.947	22.4571
11	103.789	45.0757	28.315	22.683	21.874	22.0086	0.154809	0.460709	3.20731	-19.2813	0.449941	0.195057	0.536503	3.12605	33.2031	0.544118
12	162.52	47.05	29.204	22.865	21.813	21.78	0.22767	0.640953	3.86217	123.121	0.643134	0.186932	0.506676	2.85536	28.0017	0.517262
13	160.393	48.9529	30.111	23.059	21.756	21.5343	0.212815	0.568608	3.07738	18.0855	0.584979	0.178974	0.477423	2.61376	24.3454	0.491217
14	147.004	50.8757	31.003	23.278	21.719	21.3814	0.184932	0.475742	2.35735	10.8869	0.498416	0.17218	0.450419	2.40301	21.5703	0.468041
15	129.117	52.7457	31.844	23.511	21.69	21.2414	0.154434	0.387367	1.77261	7.19602	0.40984	0.168408	0.421919	2.08248	24.8981	0.448049		Fig: Temperature distribution during heating test						Fig: Thermal Conductivity during heating test
16	117.296	53.6943	32.626	23.771	21.685	21.2014	0.139185	0.331157	1.40575	6.06403	0.360989	0.153247	0.363834	1.6467	7.79019	0.396921
17	107.25	53.74	33.337	24.04	21.685	21.14	0.131414	0.288399	1.13854	4.91972	0.328988	0.139982	0.314299	1.31056	5.61891	0.352571
18	101.023	53.67	34.001	24.332	21.711	21.0817	0.128404	0.261204	0.963595	4.01311	0.309998	0.130219	0.2761	1.06578	4.44934	0.318717
19	93.5743	53.8557	34.609	24.627	21.745	21.05	0.121546	0.234358	0.811713	3.36598	0.285238	0.125296	0.250318	0.899297	3.7883	0.29775
20	90.92	54.1271	35.179	24.934	21.796	21.0086	0.119959	0.221864	0.724347	2.88661	0.274529	0.122727	0.232011	0.779674	3.26307	0.283396
21	87.1829	54.4029	35.709	25.248	21.863	21.0557	0.116593	0.208352	0.643891	2.69988	0.26144	0.121753	0.21971	0.694454	2.85923	0.273766
22	88.0271	54.5457	36.202	25.565	21.941	21.0843	0.119969	0.206889	0.607251	2.56874	0.26307	0.121057	0.210494	0.629097	2.56	0.265932
23	87.5314	54.7114	36.657	25.878	22.028	21.1114	0.121205	0.203014	0.568386	2.38747	0.26051	0.122252	0.205836	0.58456	2.33567	0.262749
24	88.15	54.77	37.083	26.189	22.123	21.07	0.124597	0.20229	0.541995	2.09283	0.261573	0.124054	0.203094	0.550352	2.16414	0.261292
25	86.4414	54.9657	37.472	26.485	22.215	21.0886	0.123532	0.19669	0.506097	1.91848	0.255162	0.127206	0.203112	0.52733	2.01682	0.262871
26	89.2317	55.015	37.843	26.786	22.324	21.0817	0.129909	0.201754	0.499953	1.79565	0.262962	0.129696	0.202609	0.50581	1.87129	0.263307
27	90.0733	55.18	38.194	27.083	22.439	21.1033	0.13257	0.202667	0.484891	1.68592	0.264326	0.132909	0.20356	0.489949	1.73937	0.265236
28	92.975	55.28	38.517	27.368	22.553	21.16	0.138661	0.208483	0.482736	1.66861	0.272494	0.138093	0.207677	0.482584	1.65538	0.271008
29	90.9029	55.3714	38.831	27.656	22.679	21.2129	0.137395	0.203362	0.456615	1.55003	0.26612	0.144867	0.214276	0.481984	1.5902	0.279752
30	93.85	55.4414	39.114	27.924	22.794	21.1914	0.1437	0.209674	0.457359	1.46405	0.274015	0.152549	0.222412	0.485072	1.54399	0.290181
31	103.501	55.4829	39.4	28.204	22.928	21.2086	0.160888	0.231113	0.490435	1.50488	0.30198	0.161163	0.23197	0.491607	1.51503	0.302313
32	108.731	55.5586	39.657	28.465	23.049	21.19	0.170944	0.242878	0.501899	1.46223	0.316369	0.170956	0.243118	0.501431	1.48587	0.316235
33	115.726	55.6586	39.908	28.725	23.178	21.2129	0.183685	0.258709	0.521569	1.47223	0.335965	0.182537	0.256848	0.516755	1.47546	0.333338
34	120.39	55.7471	40.142	28.977	23.305	21.2757	0.192869	0.26957	0.530633	1.48316	0.349246	0.194799	0.271461	0.533637	1.47133	0.351357
35	127.707	55.77	40.362	29.219	23.43	21.25	0.207208	0.286518	0.551506	1.46453	0.36995	0.206153	0.284983	0.547773	1.45308	0.367414		Fig: Heat Flux during Heating Test
36	133.122	55.8067	40.573	29.46	23.558	21.305	0.218466	0.299473	0.563884	1.47716	0.385841	0.217432	0.29834	0.561432	1.44438	0.383257
37	138.29	55.84	40.778	29.696	23.689	21.28	0.229535	0.31197	0.575537	1.43514	0.400145	0.229145	0.312063	0.575438	1.43869	0.399506
38	143.974	55.9386	40.964	29.915	23.808	21.1943	0.240365	0.325763	0.589382	1.3771	0.414383	0.24067	0.325574	0.589064	1.42843	0.415236
39	148.207	55.9767	41.15	30.135	23.934	21.29	0.249899	0.336375	0.597511	1.40135	0.427273	0.252452	0.339648	0.603339	1.42069	0.431288
40	155.845	55.99	41.325	30.343	24.055	21.335	0.265675	0.354774	0.619613	1.4324	0.449704	0.264132	0.353323	0.616907	1.4092	0.446759
41	159.483	56.0686	41.493	30.544	24.175	21.35	0.273545	0.364149	0.626012	1.41135	0.459359	0.276245	0.367358	0.630984	1.40358	0.462677
42	168.044	56.1586	41.656	30.745	24.296	21.3171	0.28968	0.385034	0.651435	1.41031	0.482312	0.288375	0.381504	0.645125	1.40843	0.478767
43	171.91	56.13	41.815	30.94	24.417	21.34	0.300227	0.395195	0.658861	1.39673	0.494136	0.301175	0.396445	0.660521	1.40787	0.495508
44	177.821	56.1071	41.964	31.127	24.532	21.3471	0.314324	0.410218	0.674077	1.39584	0.511569	0.313814	0.41118	0.675264	1.4066	0.511822
45	183.49	56.2067	42.104	31.305	24.641	21.39	0.325275	0.424785	0.688363	1.41103	0.527018	0.32741	0.427346	0.692129	1.40933	0.529617
46	189.806	56.2229	42.246	31.485	24.757	21.3614	0.3395	0.440957	0.705283	1.39745	0.544458	0.340699	0.442344	0.706876	1.41074	0.54622
47	196.374	56.2414	42.379	31.658	24.866	21.4171	0.354148	0.45792	0.722815	1.42347	0.5639	0.35402	0.457683	0.722044	1.41508	0.563016
48	203.964	56.3414	42.512	31.829	24.976	21.4114	0.368714	0.47731	0.744069	1.4305	0.583923	0.367706	0.473886	0.738339	1.42008	0.580412
49	208.65	56.26	42.63	31.985	25.073	21.4	0.382704	0.490019	0.754666	1.42016	0.598537	0.381487	0.490069	0.754405	1.42524	0.597748
50	213.232	56.305	42.757	32.15	25.182	21.4467	0.393474	0.502573	0.765039	1.42713	0.611709	0.395171	0.506038	0.769934	1.4315	0.61475
51	221.373	56.3633	42.869	32.3	25.278	21.41	0.410123	0.523638	0.788142	1.4308	0.63334	0.408334	0.521194	0.784077	1.43273	0.630575
52	226.633	56.4171	42.983	32.453	25.378	21.4629	0.421748	0.538065	0.800823	1.44716	0.648369	0.421462	0.536183	0.797777	1.43525	0.646198
53	232.017	56.4186	43.093	32.599	25.473	21.4486	0.435286	0.552738	0.813981	1.4413	0.663475	0.434785	0.551484	0.811882	1.43692	0.661905
54	235.894	56.4171	43.203	32.747	25.571	21.4529	0.446291	0.564017	0.821817	1.43204	0.674672	0.447246	0.566279	0.825145	1.44016	0.676824
55	242.65	56.47	43.3	32.881	25.659	21.47	0.460611	0.58223	0.839968	1.44814	0.693286	0.460063	0.580777	0.837782	1.44082	0.691432
56	248	56.4243	43.398	33.015	25.75	21.42	0.475961	0.59713	0.853407	1.43187	0.708485	0.473588	0.59669	0.852304	1.44893	0.70767
57	250.844	56.5357	43.49	33.144	25.834	21.5086	0.480702	0.606138	0.857881	1.44982	0.716143	0.486678	0.610994	0.864469	1.4514	0.722203
58	257.826	56.4814	43.586	33.275	25.922	21.4314	0.499839	0.625123	0.8766	1.43537	0.735594	0.499762	0.625838	0.877389	1.45562	0.737066
59	266.951	56.6	43.677	33.401	26.006	21.5686	0.516427	0.649454	0.902473	1.50398	0.762034	0.512046	0.639929	0.889142	1.45912	0.750921
60	267.44	56.45	43.761	33.52	26.084	21.5	0.526913	0.652866	0.899139	1.45855	0.765207	0.523825	0.653662	0.900325	1.46518	0.764341
61	272.727	56.52	43.844	33.636	26.162	21.4971	0.537881	0.667925	0.912253	1.46161	0.778712	0.536662	0.668129	0.912501	1.47039	0.778667
62	277.114	56.6014	43.927	33.752	26.24	21.5357	0.546601	0.68087	0.922239	1.47267	0.790271	0.548088	0.681231	0.922773	1.47649	0.79139
63	281.296	56.5986	44.005	33.861	26.313	21.5429	0.558411	0.693256	0.93169	1.47425	0.802425	0.558771	0.692489	0.930539	1.47912	0.802411
64	286.103	56.62	44.084	33.973	26.389	21.5767	0.570563	0.707406	0.943115	1.4863	0.816427	0.570393	0.706388	0.941867	1.48523	0.815582
65	289.029	56.62	44.158	34.078	26.46	21.5714	0.57982	0.716837	0.948505	1.47808	0.824652	0.581143	0.719011	0.951491	1.48785	0.827233
66	292.79	56.61	44.229	34.178	26.528	21.72	0.591208	0.728261	0.95683	1.52241	0.83918	0.592324	0.731481	0.960889	1.49063	0.838982
67	300.693	56.6567	44.298	34.277	26.594	21.5867	0.608264	0.750158	0.978437	1.50126	0.857409	0.602846	0.74336	0.96952	1.49308	0.849979
68	302.273	56.69	44.365	34.373	26.659	21.5529	0.61313	0.756287	0.979624	1.47995	0.860266	0.613243	0.7553	0.978238	1.49575	0.860927
69	306.129	56.6857	44.438	34.475	26.729	21.6	0.624869	0.768164	0.988021	1.49215	0.872516	0.625267	0.769352	0.989647	1.50384	0.874279
70	308.544	56.7057	44.502	34.567	26.792	21.62	0.63207	0.776407	0.992104	1.49142	0.879401	0.635996	0.782192	0.999585	1.50337	0.885589
71	313.453	56.7457	44.565	34.658	26.854	21.6471	0.643338	0.790988	1.00414	1.505	0.893064	0.645015	0.792559	1.00635	1.5041	0.894658
72	322.167	56.75	44.62	34.74	26.908	21.66	0.663988	0.8152	1.02837	1.53471	0.918117	0.654846	0.803755	1.01423	1.5079	0.904819
73	322.576	56.78	44.677	34.82	26.963	21.6543	0.666314	0.818139	1.0264	1.51909	0.918346	0.663992	0.814905	1.02209	1.51099	0.914543
74	323.497	56.7757	44.73	34.9	27.016	21.6471	0.671395	0.822729	1.0258	1.50636	0.920895	0.674225	0.827038	1.03126	1.51359	0.925255
75	327.353	56.7867	44.786	34.981	27.072	21.64	0.681948	0.834659	1.03475	1.5066	0.931392	0.684057	0.838055	1.03903	1.51404	0.934908
76	331.073	56.8557	44.841	35.06	27.125	21.6571	0.68889	0.846214	1.04308	1.51372	0.940586	0.693612	0.848907	1.04659	1.51696	0.944559
77	336.23	56.84	44.895	35.136	27.178	21.61	0.703704	0.861333	1.05626	1.50965	0.954385	0.702846	0.859353	1.05368	1.51797	0.953606
78	338.007	56.8086	44.943	35.209	27.226	21.6229	0.712159	0.86811	1.05852	1.50811	0.960637	0.712441	0.869995	1.06113	1.52125	0.963139
79	346.2	56.83	44.988	35.276	27.272	21.7067	0.730873	0.891166	1.08133	1.55516	0.98567	0.721749	0.88008	1.06794	1.52236	0.971968
80	345.451	56.8471	45.032	35.342	27.316	21.6571	0.730951	0.891258	1.07604	1.52615	0.981675	0.730256	0.888989	1.07342	1.52213	0.979648
81	347.01	56.8271	45.081	35.412	27.364	21.6914	0.738562	0.897223	1.07794	1.52933	0.987628	0.738277	0.897057	1.07789	1.52269	0.986675
82	349.393	56.8186	45.127	35.478	27.408	21.64	0.747104	0.905257	1.08238	1.51436	0.993198	0.746326	0.906606	1.08427	1.52721	0.994964
83	349.91	56.86	45.172	35.544	27.455	21.67	0.748439	0.908574	1.08144	1.51214	0.994345	0.753504	0.914823	1.08897	1.52768	1.00168
84	352.77	56.8186	45.212	35.603	27.494	21.6671	0.75985	0.917811	1.08759	1.51355	1.00357	0.760878	0.923156	1.09393	1.52909	1.00863
85	358.611	56.9129	45.247	35.658	27.531	21.7086	0.768506	0.934955	1.10315	1.53978	1.01866	0.768035	0.931362	1.09882	1.53049	1.01541
86	363.117	56.9157	45.294	35.725	27.578	21.7529	0.781118	0.948681	1.11427	1.5584	1.03267	0.774751	0.939794	1.10405	1.53331	1.02227
87	362.781	56.9214	45.332	35.781	27.616	21.7114	0.78257	0.94959	1.11078	1.53602	1.03034	0.782537	0.948485	1.10962	1.53614	1.02972
88	364.034	56.9057	45.366	35.833	27.65	21.7371	0.788655	0.954669	1.11217	1.53916	1.03511	0.789383	0.956847	1.11485	1.53782	1.03644
89	366.964	56.9586	45.406	35.892	27.693	21.7129	0.794118	0.964274	1.11893	1.53409	1.04116	0.795867	0.963682	1.11838	1.5361	1.04179
90	368.221	56.9057	45.441	35.945	27.729	21.72	0.802945	0.969412	1.12044	1.53196	1.04651	0.802162	0.970469	1.12192	1.53301	1.04688
91	370.193	56.9343	45.477	35.998	27.766	21.6986	0.807767	0.97635	1.12425	1.52533	1.05062	0.808555	0.977572	1.12592	1.53201	1.05241
92	372.047	56.93	45.502	36.038	27.791	21.7029	0.813894	0.982796	1.12783	1.52775	1.05614	0.812804	0.983229	1.12834	1.53225	1.05642
93	376.482	56.94	45.534	36.086	27.823	21.6983	0.825183	0.996194	1.13906	1.53674	1.06829	0.818905	0.989451	1.13145	1.53156	1.06139
94	377.06	56.96	45.566	36.133	27.855	21.69	0.827321	0.999311	1.13874	1.52903	1.06907	0.824351	0.995667	1.13465	1.53222	1.06624
95	374.56	57.0429	45.601	36.183	27.89	21.8129	0.818399	0.994266	1.12915	1.54086	1.06318	0.830206	1.00211	1.13811	1.53473	1.0716
96	379.024	56.9643	45.641	36.239	27.932	21.7357	0.836825	1.00783	1.14068	1.52924	1.0759	0.835298	1.00867	1.14177	1.53788	1.07679
97	380.331	56.97	45.665	36.278	27.958	21.77	0.841069	1.01292	1.14282	1.53657	1.08049	0.839338	1.01364	1.14369	1.54013	1.08059
98	382.91	56.9667	45.688	36.316	27.981	21.7767	0.848748	1.02142	1.1485	1.54291	1.08812	0.844133	1.01898	1.14615	1.5425	1.08492
99	385.119	57.0471	45.714	36.355	28.008	21.7957	0.849541	1.02874	1.15346	1.54983	1.09249	0.850925	1.02619	1.15074	1.54254	1.09081
100	385.39	57.03	45.741	36.396	28.036	21.83	0.853464	1.03101	1.15248	1.55249	1.09486	0.855561	1.03198	1.15382	1.544	1.09521
101	387.009	57.0057	45.767	36.434	28.064	21.8043	0.860883	1.03667	1.15594	1.54563	1.09941	0.86157	1.03844	1.15773	1.54536	1.10053
102	389.4	57.03	45.788	36.47	28.087	21.77	0.865949	1.04475	1.16128	1.54108	1.10437	0.865974	1.04381	1.16053	1.54455	1.10435
103	390.235	57.035	45.812	36.506	28.112	21.775	0.869275	1.04834	1.16224	1.53951	1.10674	0.871049	1.04863	1.16273	1.54244	1.10799
104	393.367	56.9686	45.833	36.539	28.135	21.7743	0.883132	1.05812	1.17018	1.54608	1.1177	0.875734	1.05438	1.16606	1.54215	1.11222
105	393.241	57.03	45.853	36.57	28.154	21.7586	0.879577	1.05904	1.16814	1.5372	1.1149	0.880358	1.05965	1.16882	1.54128	1.11606
106	393.96	57	45.872	36.602	28.176	21.76	0.885065	1.06246	1.16888	1.53507	1.11793	0.883933	1.06333	1.17004	1.54267	1.11898
107	396.807	57.0883	45.895	36.635	28.198	21.8	0.886257	1.07129	1.17579	1.55051	1.12447	0.888342	1.06811	1.17247	1.54377	1.12277
108	397.087	57.0286	45.915	36.668	28.221	21.7729	0.893248	1.07356	1.17523	1.53954	1.12631	0.891943	1.07258	1.17456	1.54249	1.12574
109	395.58	57.0286	45.929	36.691	28.237	21.86	0.89098	1.07052	1.1698	1.55081	1.12481	0.896546	1.07732	1.17708	1.54396	1.12964
110	399.263	57.04	45.951	36.724	28.26	21.8086	0.900133	1.08178	1.1793	1.54719	1.13326	0.899365	1.08142	1.17897	1.54606	1.13261
111	401.591	57.0229	45.97	36.754	28.28	21.7486	0.908343	1.08939	1.18478	1.53715	1.13848	0.90368	1.08558	1.18095	1.54641	1.13597
112	402.253	57.0171	45.988	36.781	28.3	21.8014	0.911795	1.09225	1.18575	1.54747	1.14225	0.907244	1.09037	1.18369	1.54779	1.1395
113	401.416	57.0943	46.003	36.806	28.317	21.8414	0.9048	1.09116	1.18216	1.54973	1.13868	0.911865	1.0957	1.18701	1.5492	1.14375
114	404.433	57.0514	46.019	36.831	28.332	21.8214	0.916464	1.10044	1.18965	1.55299	1.14798	0.916423	1.10027	1.1896	1.55101	1.14763
115	406.381	57.0957	46.031	36.854	28.348	21.79	0.918192	1.10707	1.1944	1.54918	1.15104	0.919392	1.10385	1.19117	1.55314	1.15042
116	406.313	57.0443	46.043	36.874	28.36	21.8514	0.92333	1.10784	1.19307	1.56068	1.15453	0.92245	1.10806	1.19339	1.55484	1.15351
117	408.12	57.01	46.063	36.902	28.381	21.84	0.932036	1.11374	1.19739	1.55985	1.16042	0.926879	1.11293	1.19639	1.55465	1.15723
118	407.939	57.0514	46.075	36.924	28.395	21.8243	0.929124	1.11446	1.19574	1.55211	1.15802	0.930364	1.11696	1.19849	1.55598	1.16035
119	410.181	57.0786	46.09	36.948	28.412	21.8357	0.9332	1.1217	1.20133	1.55932	1.16387	0.933486	1.1203	1.19994	1.55657	1.16289
120	411.086	57.0871	46.105	36.972	28.43	21.7929	0.935805	1.12528	1.20313	1.54843	1.16474	0.936527	1.12467	1.20255	1.55632	1.16582
121	411.897	57.0567	46.112	36.988	28.438	21.8467	0.940862	1.12861	1.20438	1.56227	1.16983	0.939417	1.12914	1.20529	1.55646	1.1688
122	412.251	57.0886	46.125	37.008	28.452	21.8171	0.940048	1.13045	1.20457	1.55335	1.1688	0.942748	1.13381	1.2083	1.55806	1.17228
123	414.8	57.11	46.132	37.023	28.462	21.81	0.944617	1.13843	1.21131	1.55893	1.17507	0.946859	1.1388	1.21172	1.56244	1.17662
124	416.894	57.0929	46.148	37.046	28.479	21.8014	0.952261	1.14506	1.21657	1.5608	1.18129	0.949907	1.14264	1.21395	1.56476	1.17968
125	417.323	57.11	46.156	37.061	28.487	21.8133	0.952445	1.14712	1.21683	1.56332	1.18233	0.952553	1.14625	1.21606	1.56634	1.18239
126	420.46	57.095	46.168	37.08	28.501	21.89	0.961975	1.15664	1.22526	1.59	1.19432	0.955173	1.14977	1.21804	1.569	1.18518
127	418.513	57.1043	46.173	37.092	28.507	21.82	0.957145	1.15217	1.21873	1.56465	1.18612	0.957345	1.15249	1.21923	1.56969	1.18711
128	418.856	57.0957	46.181	37.106	28.517	21.8614	0.959383	1.15387	1.21916	1.57333	1.18877	0.959427	1.15518	1.22048	1.57179	1.18923
129	418.89	57.12	46.193	37.127	28.532	21.87	0.958383	1.15511	1.21841	1.57194	1.18834	0.961068	1.15728	1.22109	1.57336	1.19078
130	419.508	57.1217	46.195	37.134	28.535	21.8283	0.959827	1.15746	1.21964	1.56377	1.18863	0.961721	1.15881	1.22116	1.57081	1.19109
131	421.616	57.11	46.208	37.152	28.55	21.86	0.966831	1.16391	1.22534	1.57554	1.19607	0.963489	1.16158	1.22256	1.57134	1.19291
132	420.49	57.1186	46.213	37.165	28.556	21.8786	0.963934	1.16183	1.22108	1.5743	1.19322	0.965583	1.16417	1.22378	1.56973	1.19444
133	422.251	57.1457	46.224	37.181	28.569	21.8543	0.966541	1.16734	1.22576	1.57211	1.19647	0.967958	1.16743	1.22581	1.57002	1.19674
134	423.443	57.1529	46.234	37.198	28.581	21.8314	0.969522	1.17154	1.22851	1.56841	1.19883	0.969774	1.17017	1.22728	1.56957	1.19843
135	423.32	57.11	46.245	37.215	28.595	21.82	0.974045	1.17198	1.22773	1.56207	1.19955	0.970713	1.17184	1.22758	1.56895	1.19921
136	425.201	57.1486	46.246	37.222	28.598	21.8443	0.975003	1.17797	1.23261	1.57395	1.20439	0.973356	1.17469	1.22923	1.56899	1.20137
137	424.479	57.1686	46.257	37.238	28.61	21.81	0.972542	1.17662	1.22994	1.56058	1.2005	0.974483	1.17624	1.2295	1.56781	1.20209
138	423.81	57.1457	46.261	37.248	28.616	21.8729	0.973406	1.17555	1.22744	1.57126	1.20152	0.975544	1.17819	1.23029	1.56728	1.20312
139	425.791	57.0971	46.262	37.255	28.619	21.8586	0.982432	1.18183	1.23261	1.57457	1.20831	0.976987	1.18087	1.23189	1.57046	1.20521
140	424.177	57.1557	46.273	37.272	28.634	21.8529	0.974429	1.17814	1.22765	1.56381	1.20154	0.977907	1.182	1.23191	1.57021	1.20582
141	426.499	57.19	46.276	37.28	28.64	21.8257	0.976953	1.18525	1.23408	1.56472	1.20601	0.979558	1.18393	1.23276	1.5742	1.20775
142	428.271	57.1543	46.275	37.283	28.641	21.8829	0.984144	1.1907	1.23892	1.58428	1.21422	0.980405	1.18552	1.23335	1.575	1.20874
143	426.266	57.1371	46.279	37.293	28.648	21.87	0.981442	1.18592	1.23269	1.57224	1.20868	0.981086	1.18787	1.2348	1.57598	1.2101
144	427.589	57.1414	46.279	37.297	28.648	21.9186	0.9841	1.19013	1.23595	1.5885	1.21395	0.982247	1.18935	1.23534	1.5755	1.21098
145	426.163	57.1629	46.284	37.306	28.655	21.8986	0.979337	1.18669	1.23154	1.57688	1.20848	0.983731	1.19111	1.23615	1.57764	1.21252
146	430.14	57.18	46.287	37.313	28.66	21.86	0.987194	1.1983	1.24275	1.5814	1.21784	0.98449	1.1921	1.23618	1.57816	1.21314
147	426.37	57.1414	46.293	37.324	28.668	21.8371	0.982562	1.18845	1.23143	1.56046	1.2077	0.985861	1.19444	1.23764	1.57923	1.21478
148	429.407	57.1629	46.29	37.326	28.667	21.8714	0.987337	1.19759	1.23977	1.57973	1.21675	0.986463	1.19597	1.23831	1.57757	1.21532
149	429.227	57.14	46.295	37.335	28.675	21.9171	0.989459	1.19762	1.23911	1.58788	1.2186	0.988115	1.19774	1.23923	1.57584	1.21637
150	430.707	57.16	46.295	37.339	28.676	21.86	0.991042	1.20229	1.24295	1.57976	1.22013	0.989425	1.19876	1.23938	1.57513	1.21706
151	430.007	57.1783	46.301	37.349	28.684	21.8667	0.988309	1.20087	1.24064	1.57689	1.21775	0.990335	1.20101	1.24083	1.57839	1.21882
152	429.18	57.13	46.302	37.354	28.687	21.83	0.990903	1.19909	1.23797	1.56475	1.21581	0.992283	1.20356	1.24262	1.58023	1.22091
153	431.25	57.1286	46.308	37.364	28.696	21.8571	0.996366	1.20542	1.2438	1.57647	1.22266	0.994928	1.20679	1.24515	1.57965	1.22327
154	430.579	57.19	46.305	37.366	28.696	21.8971	0.988926	1.20421	1.24158	1.58328	1.22002	0.995383	1.20802	1.24561	1.58045	1.22399
155	434.385	57.155	46.306	37.371	28.699	21.88	1.00098	1.2154	1.25226	1.59255	1.23142	0.997349	1.21079	1.2477	1.58128	1.22607
156	436.026	57.1214	46.307	37.374	28.701	21.8186	1.00797	1.22027	1.25685	1.58384	1.2351	0.998326	1.21306	1.2493	1.58448	1.22789
157	432.43	57.1786	46.305	37.377	28.702	21.8829	0.994223	1.21088	1.2462	1.58535	1.22516	0.999517	1.21508	1.25063	1.58526	1.22929
158	435.62	57.17	46.302	37.377	28.701	21.82	1.00207	1.22022	1.25524	1.58269	1.23231	1.00169	1.2176	1.25255	1.5866	1.23143
159	433.62	57.17	46.305	37.383	28.705	21.875	0.997745	1.21503	1.24919	1.58719	1.22856	1.00236	1.21844	1.25274	1.5864	1.23191
160	435.023	57.1267	46.302	37.384	28.705	21.83	1.0047	1.21951	1.25309	1.5819	1.23248	1.00181	1.21872	1.25232	1.58762	1.23186
161	435.733	57.1543	46.306	37.391	28.711	21.8714	1.00415	1.22191	1.25499	1.59269	1.23497	1.00287	1.21993	1.25292	1.5891	1.23294
162	435.303	57.1243	46.303	37.392	28.711	21.8714	1.00566	1.22125	1.25361	1.59112	1.2348	1.00297	1.2198	1.25219	1.58917	1.23277
163	435.456	57.1457	46.304	37.397	28.715	21.8786	1.00412	1.22223	1.2539	1.59241	1.23473	1.00285	1.22066	1.25248	1.58914	1.23302
164	434.28	57.14	46.301	37.397	28.714	21.91	1.00166	1.21934	1.25037	1.59568	1.2327	1.00179	1.22105	1.25233	1.58894	1.23264
165	434.217	57.13	46.304	37.401	28.718	21.8614	1.00272	1.2193	1.25019	1.58322	1.23117	0.999468	1.22075	1.25152	1.58794	1.23134
166	434.666	57.2029	46.303	37.404	28.719	21.8714	0.996953	1.22111	1.2512	1.58693	1.23025	1.00023	1.2217	1.25194	1.58612	1.23169
167	434.954	57.2029	46.299	37.402	28.717	21.8371	0.997249	1.22219	1.25203	1.58054	1.22988	0.999896	1.22252	1.25229	1.58508	1.2317
168	433.959	57.2857	46.304	37.41	28.726	21.8843	0.987912	1.21981	1.2493	1.58571	1.22582	1.00136	1.22493	1.25426	1.58548	1.2334
169	436.64	57.1	46.303	37.413	28.726	21.81	1.01102	1.2279	1.25659	1.57837	1.23729	1.00105	1.22615	1.25499	1.5854	1.23376
170	436.516	57.1957	46.302	37.415	28.729	21.8443	1.00176	1.22796	1.25638	1.58509	1.23479	1.00108	1.2268	1.25516	1.58666	1.23417
171	439.3	57.1571	46.304	37.42	28.732	21.8614	1.01192	1.23621	1.2641	1.59848	1.24463	1.00092	1.22685	1.25471	1.58504	1.23377
172	436.25	57.1986	46.298	37.416	28.728	21.8371	1.00052	1.2279	1.25532	1.58271	1.23369	1.00204	1.22742	1.25481	1.58693	1.23464
173	435.243	57.2067	46.295	37.417	28.729	21.91	0.997197	1.22562	1.25243	1.5957	1.2331	0.999935	1.22651	1.2535	1.58731	1.23336
174	434.005	57.1817	46.289	37.414	28.726	21.8117	0.996094	1.22255	1.24886	1.56922	1.22704	0.998694	1.22543	1.25203	1.58773	1.23232
175	434.39	57.19	46.284	37.41	28.722	21.93	0.995759	1.22377	1.24997	1.5989	1.23196	0.995608	1.22321	1.24942	1.58661	1.22979
176	433.514	57.1571	46.279	37.407	28.719	21.8643	0.996297	1.22158	1.24745	1.58108	1.22833	0.994261	1.22243	1.24828	1.58589	1.22869
177	432.98	57.18	46.28	37.41	28.723	21.9067	0.993073	1.22035	1.24606	1.58802	1.2275	0.993852	1.22188	1.24744	1.58373	1.22787
178	432.965	57.205	46.275	37.408	28.72	21.915	0.990313	1.22072	1.24587	1.59061	1.22688	0.993466	1.2223	1.24758	1.58668	1.22831
179	433.466	57.21	46.276	37.411	28.723	21.8543	0.991096	1.22241	1.24731	1.57768	1.22601	0.991599	1.22107	1.24607	1.58506	1.22667
180	433.147	57.1614	46.271	37.408	28.721	21.87	0.99433	1.22178	1.24654	1.5806	1.22734	0.990732	1.22091	1.24564	1.58524	1.22622
181	434.35	57.2	46.269	37.408	28.72	21.89	0.99339	1.22545	1.24986	1.58986	1.2301	0.99134	1.22135	1.24577	1.58622	1.22675
182	430.628	57.2183	46.263	37.404	28.718	21.9367	0.982691	1.21523	1.23943	1.58755	1.22054	0.990763	1.22167	1.24586	1.58494	1.22643
183	432.369	57.1729	46.257	37.4	28.714	21.8829	0.99023	1.22041	1.24444	1.58234	1.22519	0.990809	1.22287	1.24682	1.5876	1.22739
184	433.347	57.1157	46.253	37.398	28.71	21.9171	0.997327	1.22345	1.24697	1.59486	1.23115	0.98941	1.22264	1.24631	1.58685	1.22656
185	433.066	57.2243	46.247	37.394	28.708	21.8629	0.986277	1.22293	1.24645	1.58165	1.22468	0.989232	1.22294	1.24637	1.58676	1.22656
186	435.719	57.2343	46.247	37.397	28.711	21.8871	0.991415	1.23084	1.25408	1.59631	1.23268	0.990219	1.22477	1.24795	1.58782	1.22795
187	431.847	57.2057	46.24	37.392	28.706	21.8529	0.984539	1.22018	1.24294	1.57536	1.22153	0.989825	1.22572	1.2487	1.58911	1.2284
188	434.356	57.1829	46.238	37.392	28.707	21.8743	0.992146	1.22755	1.2503	1.58925	1.23017	0.987967	1.22537	1.24812	1.58781	1.22727
189	434.421	57.2057	46.231	37.387	28.702	21.8929	0.989596	1.22801	1.25049	1.59499	1.23021	0.988197	1.22594	1.24846	1.58839	1.22767
190	434.083	57.2157	46.226	37.382	28.698	21.8786	0.987475	1.22705	1.24966	1.59135	1.2284	0.987326	1.22527	1.24756	1.58824	1.22692
191	431.788	57.1967	46.23	37.389	28.704	21.8967	0.98432	1.22098	1.24291	1.58575	1.2232	0.987076	1.22604	1.24817	1.59345	1.22794
192	433.8	57.2	46.222	37.383	28.699	21.86	0.987885	1.22695	1.24885	1.58576	1.2275	0.985988	1.22554	1.24748	1.59272	1.22712
193	433.413	57.2157	46.219	37.382	28.698	21.9057	0.985324	1.22613	1.24773	1.59524	1.22745	0.984828	1.22553	1.24732	1.59061	1.22631
194	433.183	57.2343	46.215	37.379	28.696	21.9771	0.982783	1.22562	1.24722	1.61182	1.22864	0.983273	1.22495	1.24647	1.59076	1.22538
195	432.525	57.195	46.212	37.378	28.696	21.87	0.984533	1.22403	1.24546	1.58411	1.22442	0.981906	1.22449	1.24589	1.58937	1.22439
196	433.853	57.26	46.209	37.376	28.695	21.8314	0.981479	1.22793	1.24943	1.58027	1.22458	0.980832	1.2237	1.24492	1.58929	1.22353
197	431.914	57.2557	46.199	37.37	28.688	21.9071	0.976588	1.223	1.24371	1.5924	1.22187	0.979431	1.22309	1.24418	1.58735	1.22236
198	430.06	57.23	46.2	37.371	28.692	21.87	0.974751	1.21775	1.23879	1.576	1.21623	0.978122	1.22249	1.24345	1.5842	1.22106
199	431.205	57.195	46.199	37.373	28.694	21.8933	0.980368	1.22141	1.24209	1.58516	1.22149	0.977473	1.22225	1.24308	1.58537	1.22084
200	431.321	57.2457	46.192	37.367	28.689	21.8714	0.975512	1.22187	1.24257	1.58165	1.21931	0.976	1.22063	1.24129	1.58702	1.21967
201	431.109	57.2557	46.186	37.362	28.685	21.9057	0.973622	1.22141	1.2421	1.5898	1.21954	0.97461	1.21972	1.24028	1.58825	1.21883
202	431.36	57.1871	46.183	37.361	28.684	21.9114	0.979995	1.2224	1.24283	1.59231	1.22282	0.97423	1.22001	1.2405	1.59224	1.21939
203	429.256	57.23	46.18	37.359	28.683	21.9414	0.971167	1.21657	1.23691	1.59182	1.21642	0.973468	1.21969	1.24014	1.59239	1.21895
204	429.13	57.27	46.174	37.356	28.681	21.98	0.966857	1.21663	1.23669	1.60099	1.21601	0.972816	1.21921	1.23961	1.59395	1.21868
205	430.279	57.2329	46.167	37.348	28.675	21.9686	0.972086	1.21975	1.24028	1.60398	1.22015	0.972281	1.21878	1.23907	1.59388	1.21822
206	429.996	57.1871	46.162	37.345	28.673	21.8957	0.975034	1.21922	1.23961	1.58616	1.21841	0.970616	1.218	1.23829	1.59274	1.21702
207	429.687	57.2186	46.155	37.339	28.668	21.9229	0.97095	1.21849	1.23886	1.59258	1.21739	0.970622	1.21835	1.23862	1.59392	1.21736
208	429.507	57.2171	46.146	37.333	28.662	21.9057	0.96988	1.21839	1.23834	1.58929	1.21634	0.971312	1.2187	1.23902	1.59286	1.21766
209	429.05	57.22	46.143	37.329	28.66	21.89	0.968335	1.21696	1.23731	1.58438	1.21441	0.970466	1.21842	1.23868	1.59205	1.21706
210	429.63	57.1971	46.138	37.327	28.66	21.9471	0.97121	1.21902	1.23927	1.60003	1.21881	0.969699	1.21863	1.23883	1.59229	1.21688
211	429.653	57.1843	46.13	37.319	28.653	21.9129	0.971688	1.21908	1.23948	1.59363	1.21813	0.968496	1.21804	1.23818	1.59296	1.2162
212	429.043	57.2257	46.124	37.316	28.651	21.94	0.966164	1.21776	1.23786	1.59828	1.21591	0.968034	1.21854	1.23871	1.59453	1.2165
213	429.979	57.2057	46.12	37.314	28.65	21.88	0.969668	1.2207	1.2407	1.58781	1.21718	0.967813	1.21917	1.23938	1.59664	1.21704
214	427.748	57.225	46.115	37.309	28.645	21.95	0.96253	1.21437	1.23427	1.59727	1.21261	0.966769	1.21902	1.23922	1.59568	1.21641
215	430.35	57.24	46.11	37.305	28.643	21.92	0.966644	1.22189	1.24206	1.60029	1.21843	0.965103	1.21862	1.23878	1.59689	1.21572
216	430.176	57.2229	46.099	37.294	28.635	21.91	0.966786	1.2214	1.24199	1.59917	1.21818	0.964566	1.21937	1.23956	1.59918	1.21621
217	428.864	57.2171	46.094	37.291	28.632	21.9029	0.963901	1.21795	1.2382	1.59331	1.21442	0.963201	1.21971	1.23996	1.60174	1.21622
218	428.217	57.2371	46.086	37.284	28.625	21.9429	0.96003	1.21625	1.23634	1.6021	1.21328	0.963386	1.2209	1.24121	1.60303	1.21707
219	430.553	57.2633	46.079	37.278	28.621	21.9533	0.962403	1.22302	1.24337	1.61433	1.21935	0.962886	1.22141	1.24177	1.60571	1.21752
220	430.541	57.2857	46.075	37.275	28.619	21.9157	0.960112	1.22313	1.24348	1.60571	1.21725	0.96248	1.22156	1.2419	1.60515	1.21735
221	430.29	57.23	46.069	37.271	28.617	21.92	0.963825	1.22269	1.24304	1.60628	1.21861	0.962158	1.22217	1.2425	1.60622	1.21767
222	431.263	57.2571	46.063	37.265	28.612	21.9529	0.963144	1.22546	1.24599	1.61906	1.22156	0.962946	1.22328	1.24366	1.60744	1.21871
223	430.141	57.2157	46.06	37.263	28.611	21.87	0.963949	1.22241	1.2429	1.59524	1.21695	0.962387	1.22323	1.24359	1.60683	1.21837
224	429.97	57.235	46.057	37.262	28.61	21.895	0.961643	1.2222	1.2424	1.60078	1.21667	0.962629	1.22359	1.24402	1.60668	1.21864
225	430.577	57.1986	46.05	37.256	28.606	21.9229	0.965543	1.22407	1.24444	1.61068	1.22061	0.962571	1.22454	1.24505	1.60985	1.21955
226	430.041	57.2586	46.042	37.249	28.599	21.9214	0.958496	1.22268	1.24289	1.61002	1.21697	0.961972	1.22399	1.24453	1.60785	1.21876
227	431.08	57.24	46.035	37.242	28.596	21.88	0.961803	1.22563	1.24647	1.60468	1.21912	0.961628	1.2244	1.24501	1.61165	1.21939
228	432.333	57.2457	46.027	37.235	28.59	21.9529	0.963419	1.22934	1.25024	1.62846	1.22499	0.961111	1.2245	1.24521	1.61291	1.21944
229	429.507	57.2233	46.026	37.236	28.593	21.9033	0.958949	1.22158	1.24235	1.60511	1.21604	0.960404	1.22486	1.24569	1.61354	1.21944
230	430.82	57.2243	46.023	37.233	28.591	21.95	0.961541	1.22531	1.2463	1.62182	1.22134	0.962222	1.22647	1.24746	1.61456	1.22114
231	429.909	57.2386	46.02	37.231	28.59	21.9129	0.958029	1.22286	1.2438	1.60963	1.21698	0.962188	1.22645	1.2475	1.61846	1.22169
232	431.173	57.2386	46.017	37.229	28.59	21.9157	0.960589	1.2266	1.24775	1.61505	1.22066	0.96173	1.22645	1.24754	1.61662	1.22125
233	433.67	57.17	46.007	37.221	28.584	21.88	0.971222	1.23398	1.25527	1.61721	1.22888	0.962036	1.22772	1.2489	1.62043	1.22256
234	430.642	57.1983	46.002	37.217	28.582	21.985	0.961569	1.2255	1.24679	1.63196	1.22295	0.961749	1.2284	1.24965	1.62058	1.22281
235	431.876	57.2343	45.99	37.207	28.573	21.89	0.960212	1.22929	1.25051	1.61558	1.22191	0.961902	1.22933	1.25069	1.62375	1.2238
236	432.304	57.2271	45.982	37.199	28.566	21.9429	0.961091	1.23051	1.25189	1.63179	1.2252	0.961996	1.23065	1.25212	1.62842	1.22517
237	432.037	57.2314	45.975	37.194	28.564	21.9086	0.959534	1.23003	1.25156	1.62287	1.22311	0.960726	1.23008	1.25162	1.62977	1.22459
238	431.814	57.2257	45.97	37.189	28.56	21.9443	0.9591	1.2294	1.25106	1.63177	1.22391	0.960754	1.23179	1.25349	1.63043	1.22557
239	434.02	57.25	45.962	37.182	28.555	21.97	0.961242	1.23582	1.25774	1.64776	1.23022	0.960551	1.23315	1.25499	1.63595	1.22695
240	431.927	57.1729	45.952	37.173	28.547	21.9086	0.962331	1.23	1.25182	1.62662	1.22483	0.960497	1.23402	1.25601	1.6355	1.22733
241	434.554	57.2457	45.95	37.171	28.548	21.91	0.961768	1.23748	1.25987	1.63662	1.22979	0.960365	1.23452	1.25663	1.63754	1.22783
242	434.956	57.2843	45.943	37.165	28.542	21.9686	0.958788	1.23877	1.26103	1.65422	1.23162	0.960805	1.23559	1.2578	1.64099	1.22904
243	434.151	57.2386	45.941	37.164	28.543	21.8786	0.960718	1.23662	1.25899	1.62861	1.2278	0.95977	1.23473	1.25701	1.64022	1.2281
244	433.029	57.2271	45.934	37.158	28.538	21.9257	0.95861	1.23356	1.25588	1.63721	1.22666	0.959736	1.23588	1.25828	1.64163	1.22888
245	434.139	57.2071	45.927	37.152	28.533	21.9786	0.962174	1.23686	1.25925	1.6559	1.23235	0.958894	1.23571	1.25818	1.64102	1.22838
246	431.607	57.2314	45.921	37.147	28.53	21.96	0.954003	1.22979	1.2522	1.64234	1.22367	0.958544	1.23509	1.25765	1.6399	1.2278
247	434.457	57.2014	45.912	37.139	28.524	21.8871	0.962088	1.23805	1.26076	1.63653	1.23026	0.958323	1.23525	1.25795	1.64198	1.22812
248	433.793	57.2514	45.906	37.134	28.521	21.8771	0.955876	1.2363	1.25912	1.63231	1.22629	0.958262	1.23602	1.2589	1.64301	1.22865
249	433.091	57.2286	45.907	37.136	28.525	21.9486	0.956341	1.23444	1.25738	1.64638	1.22758	0.957701	1.23654	1.2596	1.64371	1.22881
250	434.209	57.2143	45.897	37.127	28.519	21.9129	0.959171	1.23777	1.26106	1.6432	1.23	0.957017	1.23662	1.25987	1.64239	1.22843
251	434.613	57.2286	45.889	37.119	28.513	21.9057	0.958177	1.23892	1.26253	1.64445	1.2304	0.956362	1.23687	1.26025	1.6444	1.22859
252	435.117	57.2329	45.881	37.112	28.507	21.9571	0.958251	1.2405	1.26414	1.66079	1.23348	0.956175	1.23654	1.26009	1.64555	1.22856
253	431.551	57.24	45.874	37.105	28.502	21.8957	0.949216	1.23033	1.25407	1.63311	1.22099	0.955176	1.23611	1.25984	1.64183	1.22746
254	434.777	57.2229	45.871	37.104	28.501	21.9157	0.957502	1.23981	1.26345	1.65056	1.23141	0.954043	1.23612	1.26003	1.6436	1.22729
255	432.746	57.1986	45.865	37.098	28.498	21.9029	0.954566	1.23402	1.25798	1.6404	1.22606	0.953554	1.23617	1.26026	1.64311	1.22708
256	431.84	57.23	45.858	37.091	28.493	21.83	0.949349	1.23144	1.25564	1.62029	1.21989	0.952833	1.23598	1.26027	1.64208	1.2266
257	434.074	57.2571	45.849	37.082	28.486	21.9314	0.951238	1.23781	1.26243	1.65562	1.22878	0.952785	1.2365	1.26095	1.64318	1.22702
258	434.544	57.2214	45.843	37.077	28.483	21.8629	0.954755	1.23929	1.26409	1.64099	1.22896	0.950741	1.23539	1.26001	1.64095	1.22536
259	434.499	57.2357	45.84	37.074	28.482	21.9129	0.953206	1.23916	1.26425	1.65356	1.23008	0.949821	1.23506	1.25984	1.639	1.22459
260	432.58	57.2271	45.83	37.066	28.475	21.8843	0.948878	1.23397	1.25882	1.64087	1.22395	0.948386	1.23455	1.25952	1.64346	1.22441
261	431.857	57.2667	45.82	37.057	28.467	21.8633	0.943193	1.23205	1.25686	1.63491	1.21982	0.947056	1.23323	1.25832	1.64127	1.22294
262	431.74	57.2	45.816	37.053	28.465	21.83	0.948129	1.23171	1.25681	1.62675	1.22064	0.945476	1.23226	1.2575	1.64192	1.22194
263	430.399	57.2643	45.809	37.046	28.461	21.9457	0.939301	1.22789	1.25334	1.6515	1.21862	0.943951	1.23136	1.25673	1.64217	1.22093
264	430.591	57.2314	45.803	37.041	28.457	21.8943	0.941931	1.22858	1.25405	1.64029	1.21852	0.943236	1.23091	1.25645	1.642	1.22044
265	431.964	57.2414	45.798	37.036	28.454	21.8914	0.943695	1.23249	1.25834	1.64556	1.22196	0.943656	1.23112	1.2569	1.64669	1.22141
266	432.093	57.25	45.789	37.027	28.446	21.92	0.94253	1.23286	1.25887	1.65528	1.22302	0.943455	1.23189	1.25782	1.65075	1.2223
267	431.312	57.21	45.786	37.025	28.446	21.87	0.943872	1.23077	1.25688	1.63972	1.22046	0.943735	1.2331	1.25918	1.65134	1.22312
268	432.27	57.2	45.778	37.017	28.44	21.96	0.946135	1.23351	1.25997	1.66771	1.22665	0.942981	1.23331	1.25956	1.65399	1.2233
269	433.399	57.2157	45.771	37.013	28.436	21.89	0.946722	1.23715	1.26326	1.6552	1.22686	0.942161	1.23257	1.25892	1.65431	1.22267
270	433.119	57.2657	45.762	37.004	28.43	21.89	0.941258	1.23635	1.26288	1.65565	1.22434	0.942046	1.23351	1.26003	1.65462	1.22315
271	430.9	57.26	45.759	37.001	28.429	21.935	0.936658	1.23002	1.25671	1.65884	1.21982	0.940708	1.2329	1.25952	1.65826	1.22282
272	429.87	57.2067	45.749	36.993	28.422	21.9	0.937953	1.22736	1.25385	1.64777	1.21753	0.939446	1.23235	1.2591	1.65517	1.22163
273	434.151	57.2714	45.746	36.989	28.42	21.8714	0.941725	1.23944	1.26663	1.65743	1.22642	0.937751	1.23087	1.25781	1.65413	1.2201
274	429.5	57.23	45.74	36.985	28.418	21.97	0.934508	1.22644	1.25336	1.66525	1.21809	0.936666	1.22935	1.25641	1.65417	1.21895
275	430.649	57.2114	45.725	36.97	28.405	21.8643	0.937299	1.22972	1.257	1.64603	1.21834	0.935965	1.22858	1.25583	1.65322	1.21819
276	429.56	57.2133	45.726	36.972	28.41	21.8933	0.934856	1.22675	1.25426	1.64793	1.21619	0.936697	1.22952	1.25703	1.65472	1.21922
277	429.15	57.205	45.714	36.961	28.399	21.92	0.933665	1.22572	1.25307	1.65593	1.21624	0.935239	1.22745	1.2551	1.65392	1.21753
278	428.803	57.2143	45.709	36.955	28.397	21.9086	0.931752	1.22459	1.25264	1.65218	1.21454	0.934122	1.22715	1.25503	1.65457	1.21705
279	432.084	57.1571	45.703	36.949	28.391	21.8771	0.943074	1.23396	1.26222	1.65833	1.22473	0.932371	1.22544	1.25346	1.65508	1.21559
280	428.87	57.21	45.7	36.947	28.391	21.9	0.931516	1.22492	1.25313	1.65179	1.21459	0.931024	1.22504	1.25327	1.65672	1.21509
281	428.681	57.2529	45.688	36.935	28.381	21.9629	0.92669	1.22438	1.25287	1.6698	1.21474	0.930601	1.22543	1.2539	1.65715	1.21522
282	426.297	57.2	45.679	36.927	28.374	21.9133	0.925043	1.21771	1.24604	1.64958	1.2081	0.930176	1.22506	1.25369	1.65586	1.21472
283	428.489	57.2514	45.676	36.924	28.374	21.9186	0.925427	1.22397	1.25289	1.65941	1.21272	0.927435	1.22325	1.252	1.65447	1.21253
284	429.97	57.2186	45.669	36.919	28.371	21.8914	0.930706	1.22849	1.25752	1.65894	1.21711	0.926259	1.22271	1.25168	1.65705	1.21216
285	427.699	57.1714	45.659	36.909	28.363	21.8557	0.928776	1.222	1.25117	1.64315	1.21107	0.92545	1.22171	1.25087	1.6539	1.21096
286	427.39	57.22	45.655	36.906	28.361	21.88	0.923887	1.22125	1.25041	1.64863	1.20937	0.924175	1.22135	1.25072	1.6534	1.21022
287	427.357	57.2167	45.645	36.896	28.355	21.9567	0.923282	1.22116	1.2509	1.6698	1.21202	0.923745	1.22075	1.25025	1.6536	1.2098
288	426.03	57.2	45.636	36.887	28.347	21.8833	0.921026	1.21737	1.24716	1.64779	1.20631	0.92241	1.21895	1.24864	1.654	1.20846
289	425.191	57.24	45.637	36.89	28.352	21.8943	0.916124	1.21525	1.245	1.64606	1.20295	0.921745	1.21893	1.24883	1.65602	1.20849
290	426.714	57.1971	45.632	36.886	28.349	21.9257	0.922415	1.21974	1.2496	1.66081	1.2098	0.920808	1.2181	1.24821	1.65691	1.20786
291	425.416	57.1671	45.624	36.877	28.343	21.9429	0.92136	1.21589	1.24624	1.66174	1.20773	0.920315	1.21788	1.24818	1.65626	1.2075
292	427.46	57.18	45.616	36.87	28.338	21.89	0.924118	1.22187	1.25252	1.65734	1.21128	0.92016	1.21807	1.24858	1.65694	1.20766
293	425.165	57.195	45.608	36.863	28.333	21.91	0.917332	1.21545	1.24609	1.65485	1.20495	0.919885	1.21823	1.24895	1.65944	1.208
294	426.621	57.1971	45.602	36.857	28.329	21.9243	0.919828	1.21962	1.25065	1.66526	1.20949	0.918867	1.21806	1.24901	1.65566	1.20703
295	426.28	57.1814	45.597	36.852	28.326	21.8771	0.919942	1.21864	1.24994	1.65254	1.20745	0.916726	1.21804	1.2492	1.65584	1.20616
296	425.447	57.2214	45.587	36.843	28.318	21.9243	0.914199	1.2164	1.24765	1.66354	1.20533	0.914459	1.21675	1.24811	1.65625	1.20466
297	426.2	57.2271	45.586	36.842	28.318	21.7986	0.915288	1.21855	1.25	1.63435	1.20298	0.913284	1.2163	1.24786	1.65798	1.20421
298	425.27	57.31	45.58	36.835	28.313	21.92	0.906373	1.21575	1.24757	1.66303	1.20167	0.911866	1.21587	1.24762	1.65724	1.20334
299	424.2	57.2543	45.578	36.834	28.315	21.9271	0.908251	1.21283	1.24486	1.66018	1.20078	0.910231	1.21529	1.24722	1.65926	1.20266
300	423.976	57.2271	45.568	36.825	28.307	21.9486	0.909106	1.21233	1.24435	1.66698	1.20179	0.908842	1.21484	1.24695	1.6562	1.20147
301	425.457	57.2486	45.559	36.816	28.3	21.8929	0.909907	1.21657	1.24899	1.66009	1.20336	0.908325	1.2139	1.24623	1.65875	1.20119
302	424.776	57.24	45.551	36.808	28.293	21.9214	0.908495	1.21462	1.24714	1.66668	1.2027	0.909213	1.21413	1.24668	1.65935	1.20182
303	424.249	57.2714	45.545	36.803	28.289	21.83	0.904471	1.21325	1.24574	1.64208	1.19704	0.9089	1.21372	1.24647	1.65877	1.20146
304	423.789	57.1571	45.536	36.794	28.284	21.8714	0.911676	1.21193	1.24497	1.65218	1.20102	0.907473	1.21299	1.24595	1.65796	1.20043
305	425.687	57.1886	45.527	36.785	28.276	21.8929	0.912585	1.21736	1.2507	1.66723	1.20606	0.906842	1.21213	1.24528	1.65857	1.19987
306	423.1	57.1971	45.523	36.781	28.274	21.8871	0.906062	1.20996	1.24339	1.65614	1.19824	0.905911	1.21073	1.24405	1.65783	1.19873
307	422.097	57.2514	45.515	36.774	28.269	21.9171	0.899118	1.20723	1.24073	1.66131	1.19458	0.90539	1.20987	1.2434	1.66031	1.19847
308	423.204	57.2014	45.517	36.777	28.274	21.9171	0.905488	1.21054	1.24428	1.66436	1.19941	0.904262	1.20952	1.24326	1.66249	1.19814
309	421.15	57.18	45.507	36.768	28.267	21.93	0.901975	1.2048	1.23853	1.66147	1.19475	0.902314	1.20801	1.24191	1.66137	1.19646
310	422.016	57.2129	45.501	36.762	28.262	21.9043	0.90083	1.20728	1.24122	1.65946	1.19522	0.901059	1.20712	1.24119	1.66203	1.19561
311	422.791	57.1871	45.492	36.753	28.256	21.9171	0.903776	1.2095	1.24394	1.66746	1.19873	0.900988	1.20743	1.24174	1.66378	1.19601
312	421.829	57.2171	45.486	36.747	28.251	21.8957	0.89895	1.20674	1.24126	1.65936	1.19426	0.89946	1.20689	1.24139	1.66523	1.1953
313	420.747	57.2029	45.48	36.742	28.248	21.9143	0.897279	1.20379	1.23837	1.66074	1.1923	0.898385	1.20686	1.24158	1.66479	1.19481
314	422.71	57.24	45.48	36.742	28.251	21.9367	0.898618	1.2094	1.24458	1.67361	1.19737	0.897537	1.20667	1.24164	1.66631	1.19459
315	421.77	57.26	45.476	36.738	28.247	21.95	0.894794	1.20671	1.24181	1.67449	1.19448	0.89661	1.20669	1.2419	1.66468	1.19404
316	421.023	57.2357	45.468	36.73	28.241	21.8943	0.894445	1.20457	1.23991	1.65843	1.1913	0.896334	1.20722	1.24265	1.66681	1.19449
317	421.454	57.2329	45.459	36.722	28.236	21.9271	0.894894	1.20595	1.24162	1.67009	1.19373	0.895757	1.20828	1.24397	1.66868	1.19504
318	422.751	57.2286	45.45	36.713	28.229	21.8471	0.897289	1.20966	1.24573	1.65607	1.19484	0.895218	1.20768	1.24359	1.66796	1.19447
319	422.973	57.2333	45.445	36.709	28.226	21.91	0.897017	1.21043	1.24653	1.67421	1.19743	0.894824	1.20776	1.24392	1.66749	1.19433
320	423.247	57.2829	45.437	36.701	28.22	21.8986	0.893239	1.21122	1.24763	1.67386	1.19614	0.894931	1.20896	1.24542	1.6724	1.19565
321	421.15	57.2	45.434	36.698	28.22	21.91	0.894845	1.20521	1.24189	1.66858	1.1934	0.895231	1.20959	1.24632	1.67353	1.19629
322	421.816	57.2457	45.424	36.689	28.213	21.9029	0.892036	1.20726	1.24415	1.67118	1.1935	0.894498	1.20944	1.2464	1.67717	1.19641
323	423.773	57.2467	45.412	36.678	28.205	21.9467	0.895195	1.213	1.25036	1.69284	1.20049	0.893233	1.20972	1.2469	1.68051	1.19645
324	422.845	57.19	45.405	36.671	28.2	21.9	0.896998	1.21034	1.24792	1.67796	1.1982	0.893411	1.20982	1.24722	1.67766	1.19625
325	422.154	57.2286	45.399	36.667	28.199	21.9229	0.892159	1.20864	1.24632	1.68158	1.19571	0.893487	1.21071	1.24833	1.67833	1.19685
326	423.413	57.3043	45.386	36.655	28.187	21.9514	0.888158	1.21238	1.25004	1.69757	1.19768	0.893176	1.21095	1.24882	1.67946	1.19702
327	423.2	57.21	45.382	36.652	28.187	21.79	0.894488	1.21191	1.24985	1.6539	1.19481	0.893436	1.21054	1.24862	1.67515	1.19644
328	423.037	57.1817	45.37	36.64	28.177	21.8567	0.895379	1.21145	1.24967	1.67332	1.19756	0.892527	1.21009	1.24834	1.67294	1.19558
329	422.29	57.23	45.366	36.633	28.171	21.8833	0.889856	1.20889	1.24761	1.67904	1.19471	0.892558	1.20972	1.2481	1.67049	1.19513
330	422.786	57.1571	45.374	36.64	28.177	21.82	0.897014	1.21017	1.24892	1.66268	1.19643	0.892485	1.20908	1.24767	1.66908	1.19467
331	421.786	57.2114	45.372	36.637	28.174	21.8314	0.890638	1.20717	1.24597	1.66252	1.19216	0.891676	1.20881	1.24758	1.67468	1.19494
332	421.347	57.1771	45.373	36.639	28.176	21.8471	0.892371	1.20605	1.24467	1.66439	1.1926	0.889898	1.20856	1.24752	1.68027	1.19475
333	421.99	57.25	45.365	36.631	28.171	21.92	0.887653	1.20789	1.24702	1.68769	1.19442	0.888691	1.20855	1.24765	1.6841	1.19471
334	422.642	57.2467	45.359	36.627	28.169	21.9283	0.888824	1.21004	1.24924	1.6931	1.19666	0.886827	1.20877	1.24805	1.68983	1.19474
335	422.523	57.3167	45.353	36.621	28.165	21.9967	0.88293	1.2097	1.24918	1.71247	1.19627	0.885921	1.20923	1.24872	1.6943	1.19516
336	422.16	57.32	45.346	36.615	28.162	21.975	0.88141	1.2088	1.24855	1.70583	1.1944	0.885718	1.21053	1.25036	1.70104	1.19661
337	423.13	57.3029	45.336	36.606	28.155	21.9429	0.883962	1.21171	1.25172	1.70283	1.19663	0.885439	1.21151	1.25161	1.70524	1.19753
338	422.624	57.28	45.332	36.603	28.155	21.9171	0.884299	1.2104	1.25066	1.69379	1.19511	0.885365	1.21237	1.25282	1.70703	1.1982
339	424.34	57.23	45.323	36.593	28.148	21.95	0.890947	1.21518	1.25619	1.7116	1.20278	0.884941	1.21208	1.25286	1.70618	1.19784
340	424.133	57.2867	45.315	36.586	28.142	21.9667	0.885702	1.21472	1.25572	1.71705	1.20083	0.885206	1.21218	1.25322	1.70608	1.19806
341	424.657	57.2533	45.302	36.572	28.131	21.9067	0.888304	1.21608	1.25772	1.70563	1.20141	0.885083	1.21222	1.25362	1.70677	1.19819
342	421.719	57.2771	45.296	36.566	28.128	21.95	0.879963	1.20767	1.24946	1.70653	1.19375	0.885197	1.21218	1.25394	1.70814	1.19847
343	422.256	57.2386	45.287	36.559	28.121	21.93	0.883264	1.20949	1.25105	1.70512	1.1959	0.883134	1.21068	1.2527	1.70536	1.19654
344	423.177	57.2629	45.283	36.554	28.121	21.9257	0.883101	1.21199	1.25453	1.70766	1.19754	0.882408	1.20984	1.25215	1.7052	1.19585
345	422.58	57.21	45.274	36.544	28.112	21.91	0.885096	1.21014	1.25291	1.7034	1.19711	0.882219	1.20966	1.2522	1.70675	1.19592
346	420.665	57.2633	45.265	36.535	28.105	21.89	0.876507	1.20465	1.24752	1.69214	1.18922	0.881516	1.20923	1.25197	1.70635	1.19539
347	422.08	57.2414	45.259	36.53	28.101	21.9514	0.880623	1.20884	1.25187	1.71589	1.19603	0.881087	1.20976	1.25284	1.70674	1.19557
348	424.123	57.2071	45.253	36.525	28.097	21.92	0.886979	1.21483	1.25808	1.71654	1.20192	0.881427	1.21076	1.25411	1.71163	1.19685
349	420.524	57.2583	45.244	36.517	28.092	21.9213	0.875045	1.20466	1.24784	1.7037	1.19004	0.88098	1.21045	1.25402	1.71297	1.19672
350	423.546	57.27	45.241	36.513	28.09	21.8899	0.880261	1.21318	1.25711	1.70783	1.19713	0.881668	1.21165	1.25553	1.71647	1.1981
351	425.573	57.2513	45.236	36.508	28.087	21.9791	0.885478	1.21899	1.26343	1.7419	1.20654	0.881941	1.21221	1.25639	1.71747	1.19868
352	421.731	57.1863	45.232	36.504	28.085	21.9295	0.881964	1.20798	1.25232	1.71282	1.19617	0.880569	1.21184	1.25632	1.71859	1.19808
353	423.502	57.2362	45.223	36.495	28.079	21.9113	0.881325	1.21306	1.25803	1.71662	1.19888	0.88076	1.21313	1.25794	1.7219	1.19925
354	423.408	57.2091	45.215	36.487	28.072	21.9282	0.882535	1.21279	1.2579	1.7229	1.20011	0.88088	1.21256	1.2576	1.72382	1.19932
355	423.207	57.2669	45.208	36.48	28.067	21.9313	0.877375	1.21221	1.2576	1.72435	1.19768	0.879929	1.21125	1.25649	1.72023	1.19788
356	423.686	57.2852	45.199	36.472	28.06	21.9264	0.876385	1.21372	1.25917	1.72691	1.19825	0.878503	1.21101	1.25651	1.72103	1.19726
357	422.094	57.1714	45.195	36.468	28.058	21.9272	0.881096	1.20916	1.25474	1.72121	1.19763	0.87768	1.211	1.25673	1.72282	1.19714
358	422.318	57.2058	45.192	36.465	28.057	21.9073	0.878822	1.2098	1.2557	1.71682	1.19642	0.876607	1.2111	1.25707	1.72217	1.19666
359	421.112	57.2564	45.183	36.456	28.05	21.9236	0.87198	1.20635	1.25242	1.71842	1.19184	0.876585	1.21114	1.25732	1.72206	1.1967
360	423.417	57.2618	45.172	36.445	28.041	21.9191	0.875568	1.21295	1.25957	1.72911	1.19803	0.875968	1.2102	1.25665	1.72056	1.19585
361	423.562	57.2674	45.166	36.44	28.038	21.8758	0.875026	1.2135	1.2603	1.71839	1.19679	0.87522	1.20992	1.25666	1.72022	1.1954
362	423.197	57.2188	45.158	36.432	28.031	21.8925	0.877218	1.21246	1.25937	1.72353	1.19797	0.873626	1.20919	1.2562	1.72088	1.19446
363	421.393	57.2313	45.151	36.424	28.026	21.8883	0.872068	1.20715	1.25444	1.71641	1.1923	0.87367	1.20973	1.25704	1.72109	1.19482
364	421.363	57.1742	45.147	36.421	28.026	21.8975	0.875856	1.2072	1.2548	1.71886	1.19445	0.87285	1.20866	1.25621	1.71786	1.1936
365	420.497	57.2637	45.148	36.422	28.029	21.9224	0.867667	1.20472	1.25252	1.72148	1.18982	0.872574	1.20814	1.25599	1.71859	1.19338
366	422.327	57.241	45.137	36.412	28.021	21.8819	0.872285	1.21011	1.25827	1.71983	1.19439	0.871394	1.20715	1.25529	1.7209	1.1927
367	420.705	57.2206	45.129	36.404	28.015	21.8518	0.869829	1.20546	1.25374	1.70651	1.18948	0.871413	1.20723	1.25562	1.72194	1.19293
368	422.239	57.2153	45.125	36.4	28.014	21.8893	0.873095	1.20985	1.25876	1.7235	1.19526	0.86969	1.20645	1.25509	1.72059	1.19165
369	420.747	57.2209	45.116	36.391	28.006	21.9597	0.868961	1.20558	1.25446	1.73969	1.19323	0.869482	1.2069	1.2558	1.72256	1.19206
370	421.422	57.1903	45.111	36.387	28.004	21.8918	0.872199	1.20765	1.25678	1.72368	1.19388	0.869106	1.20648	1.25568	1.72406	1.19193
371	419.423	57.239	45.1	36.375	27.994	21.86	0.863795	1.20179	1.25111	1.70942	1.18552	0.868621	1.20627	1.25574	1.72629	1.19194
372	421.503	57.2612	45.096	36.372	27.992	21.9194	0.866208	1.20788	1.25747	1.73527	1.19265	0.867015	1.20558	1.25528	1.72799	1.19111
373	421.296	57.203	45.092	36.367	27.991	21.904	0.869656	1.20715	1.25745	1.73032	1.19351	0.86677	1.20539	1.25535	1.72641	1.19077
374	420.152	57.214	45.091	36.367	27.992	21.8927	0.866433	1.20401	1.25418	1.72213	1.18951	0.86634	1.20609	1.25635	1.72759	1.19111
375	420.492	57.2803	45.083	36.359	27.986	21.9285	0.861856	1.20499	1.2555	1.73543	1.18945	0.866875	1.2067	1.25728	1.73149	1.19218
376	420.201	57.1862	45.073	36.35	27.979	21.9019	0.86724	1.20429	1.25493	1.72863	1.1909	0.866855	1.20663	1.25752	1.73087	1.19214
377	423.126	57.2471	45.077	36.353	27.983	21.8753	0.869196	1.21254	1.26382	1.73194	1.19623	0.866005	1.20674	1.25789	1.73201	1.19198
378	420.908	57.1954	45.066	36.341	27.974	21.9151	0.867534	1.20604	1.25764	1.73675	1.19304	0.866533	1.20805	1.25953	1.73587	1.19337
379	421.341	57.2175	45.055	36.331	27.965	21.8794	0.866068	1.20742	1.25909	1.73089	1.19231	0.867227	1.20872	1.26051	1.73834	1.19438
380	421.507	57.2575	45.057	36.333	27.97	21.9079	0.863712	1.2079	1.26004	1.73829	1.1924	0.8653	1.20811	1.26016	1.73706	1.19308
381	423.344	57.2103	45.047	36.323	27.961	21.9103	0.870127	1.21316	1.26568	1.74915	1.19928	0.863769	1.20698	1.25927	1.73813	1.19201
382	422.178	57.2206	45.043	36.318	27.957	21.9353	0.86671	1.20968	1.26234	1.75273	1.19647	0.862689	1.20642	1.25895	1.7367	1.19112
383	418.802	57.2996	45.036	36.311	27.952	21.8637	0.853754	1.20001	1.25255	1.71969	1.18186	0.861459	1.20598	1.25876	1.73605	1.1903
384	420.38	57.275	45.033	36.309	27.952	21.91	0.858479	1.20467	1.25757	1.73941	1.18869	0.861068	1.20556	1.25861	1.73689	1.19008
385	419.496	57.22	45.025	36.301	27.947	21.8735	0.859975	1.20213	1.25537	1.72675	1.18681	0.859264	1.2049	1.2582	1.74145	1.18949
386	420.256	57.2729	45.02	36.296	27.943	21.8571	0.857459	1.20431	1.2578	1.72634	1.18663	0.857737	1.20369	1.2572	1.73883	1.18793
387	420.49	57.2307	45.021	36.297	27.947	21.9199	0.860973	1.20498	1.25895	1.74415	1.19082	0.85817	1.20436	1.25818	1.74186	1.18888
388	421.686	57.3051	45.011	36.288	27.94	22.021	0.857499	1.20855	1.26284	1.78108	1.19512	0.857336	1.20387	1.25792	1.74244	1.18836
389	419.121	57.2424	45.002	36.279	27.932	21.8907	0.856023	1.20119	1.2553	1.73441	1.18558	0.857191	1.20481	1.25919	1.74565	1.18918
390	420.352	57.2594	44.994	36.271	27.927	21.8906	0.856783	1.20472	1.25944	1.7409	1.18848	0.856866	1.20498	1.25965	1.74803	1.18945
391	419.067	57.2763	44.989	36.267	27.924	21.9147	0.85264	1.20118	1.25574	1.74341	1.18509	0.856308	1.20447	1.25935	1.74667	1.18883
392	421.751	57.2521	44.977	36.254	27.914	21.8865	0.858959	1.20873	1.26424	1.74927	1.19255	0.855616	1.20398	1.25912	1.74439	1.18806
393	420.621	57.2722	44.976	36.253	27.914	21.8809	0.855185	1.2055	1.26101	1.74297	1.18849	0.855337	1.20439	1.25985	1.74463	1.18822
394	419.147	57.1972	44.971	36.249	27.912	21.8712	0.857069	1.20141	1.25689	1.73465	1.18651	0.854484	1.20369	1.2594	1.74564	1.18766
395	420.489	57.2888	44.96	36.237	27.902	21.9465	0.852654	1.20512	1.26121	1.76512	1.18976	0.855145	1.20446	1.26052	1.74844	1.18873
396	420.117	57.2535	44.956	36.233	27.9	21.8503	0.854069	1.20405	1.2604	1.73611	1.18666	0.853235	1.20315	1.25944	1.74974	1.1874
397	418.661	57.2499	44.948	36.225	27.894	21.9062	0.850809	1.19988	1.25634	1.74797	1.18454	0.852275	1.20242	1.25894	1.74908	1.18657
398	420.975	57.2176	44.941	36.218	27.889	21.9194	0.857268	1.20651	1.26358	1.763	1.19262	0.851381	1.20219	1.259	1.75145	1.18637
399	418.574	57.3112	44.936	36.213	27.886	21.9349	0.845592	1.19963	1.25668	1.75838	1.1832	0.851097	1.2022	1.25921	1.75091	1.18622
400	418.784	57.2665	44.927	36.205	27.879	21.8562	0.848463	1.20037	1.25746	1.73832	1.18266	0.850265	1.20148	1.25872	1.75019	1.18545
401	418.583	57.2225	44.923	36.201	27.878	21.9025	0.850812	1.19979	1.25731	1.75124	1.18511	0.85038	1.20191	1.25949	1.74752	1.18547
402	420.279	57.2635	44.912	36.194	27.873	21.9076	0.850663	1.20521	1.26271	1.76134	1.18871	0.850781	1.20315	1.26111	1.74458	1.18598
403	418.21	57.2337	44.908	36.188	27.87	21.8303	0.848246	1.199	1.25694	1.73109	1.18127	0.852467	1.20432	1.26263	1.74203	1.18713
404	419.61	57.2181	44.9	36.179	27.865	21.7988	0.851616	1.20287	1.26176	1.7293	1.1847	0.852996	1.20499	1.26368	1.74378	1.18798
405	423.896	57.2165	44.895	36.174	27.862	21.78	0.860076	1.21516	1.27495	1.74242	1.19621	0.852764	1.20598	1.26506	1.74691	1.18877
406	421.339	57.1745	44.889	36.168	27.856	21.804	0.857393	1.20783	1.26726	1.7405	1.19122	0.852953	1.20652	1.26608	1.74968	1.18953
407	420.425	57.2179	44.884	36.162	27.852	21.8479	0.85217	1.20507	1.26482	1.75059	1.18865	0.852822	1.20706	1.26704	1.7558	1.19051
408	421.003	57.2713	44.877	36.155	27.848	21.9121	0.849184	1.20673	1.26701	1.77312	1.19064	0.8519	1.20721	1.2675	1.76058	1.19075
409	421.835	57.253	44.875	36.152	27.847	21.9248	0.851987	1.20897	1.26982	1.78073	1.19405	0.850078	1.20601	1.26647	1.76606	1.18997
410	419.68	57.2494	44.867	36.144	27.841	21.9265	0.847331	1.2028	1.26364	1.77394	1.18812	0.848754	1.20636	1.26717	1.77441	1.19051
411	420.079	57.29	44.864	36.141	27.839	21.8813	0.845162	1.20394	1.26499	1.76277	1.18637	0.848439	1.20668	1.26783	1.77789	1.19098
412	421.05	57.28	44.857	36.134	27.831	21.92	0.847319	1.20672	1.26776	1.78079	1.19075	0.848211	1.20692	1.26841	1.7797	1.19126
413	422.351	57.2955	44.846	36.122	27.822	21.9525	0.848126	1.21031	1.27214	1.79893	1.19501	0.847836	1.20684	1.26862	1.78098	1.19124
414	421.305	57.2309	44.839	36.115	27.818	21.884	0.849961	1.20732	1.26945	1.77495	1.19191	0.847726	1.20702	1.26911	1.78271	1.19153
415	421.728	57.27	44.831	36.106	27.811	21.9071	0.847593	1.20839	1.27103	1.78579	1.19257	0.848337	1.20749	1.26994	1.78421	1.1923
416	421.77	57.2463	44.832	36.106	27.812	21.9204	0.849361	1.20837	1.27131	1.78972	1.19394	0.848372	1.20783	1.27071	1.78638	1.19281
417	420.223	57.2367	44.827	36.102	27.811	21.9288	0.846561	1.20408	1.26711	1.786	1.19017	0.847399	1.20634	1.26949	1.78346	1.19137
418	421.328	57.2282	44.828	36.103	27.814	21.8741	0.849436	1.20724	1.27075	1.7733	1.19174	0.847336	1.20646	1.27	1.78398	1.19154
419	421.982	57.2669	44.82	36.095	27.809	21.9349	0.847564	1.20912	1.27318	1.79593	1.19433	0.847248	1.20627	1.27009	1.78413	1.19149
420	418.809	57.2621	44.817	36.091	27.805	21.9179	0.841316	1.19989	1.2636	1.77852	1.18495	0.84544	1.20488	1.26892	1.78222	1.18978
421	421.774	57.2191	44.807	36.079	27.796	21.8675	0.849522	1.20811	1.27301	1.77858	1.19308	0.845279	1.20519	1.26958	1.78362	1.19008
422	421.328	57.2343	44.798	36.072	27.789	21.8943	0.846974	1.2071	1.27166	1.78688	1.19221	0.844301	1.20529	1.26999	1.78755	1.19015
423	418.357	57.2841	44.784	36.058	27.778	21.89	0.836706	1.19859	1.26315	1.77631	1.182	0.844301	1.20508	1.27007	1.7889	1.19026
424	421.137	57.2373	44.784	36.056	27.777	21.9142	0.845432	1.20628	1.2717	1.7958	1.19224	0.844061	1.20543	1.27072	1.79092	1.19059
425	421.677	57.2873	44.776	36.049	27.772	21.9182	0.842591	1.20797	1.27364	1.80087	1.19222	0.843532	1.20575	1.27131	1.79501	1.19099
426	421.549	57.2121	44.778	36.051	27.777	21.9396	0.847566	1.2076	1.27371	1.80536	1.19512	0.843338	1.2057	1.27156	1.79649	1.1911
427	419.66	57.2643	44.769	36.043	27.77	21.9174	0.839638	1.20233	1.26816	1.79261	1.18726	0.843287	1.2062	1.27237	1.79914	1.19166
428	422.518	57.2504	44.762	36.035	27.764	21.9191	0.845818	1.21038	1.27711	1.80721	1.19587	0.842232	1.20625	1.27271	1.80071	1.1914
429	421.253	57.2151	44.761	36.034	27.764	21.9043	0.845613	1.20675	1.27344	1.79726	1.19299	0.842267	1.20612	1.27285	1.7997	1.1913
430	419.67	57.2987	44.754	36.026	27.757	21.9116	0.836352	1.20208	1.26881	1.79488	1.18594	0.841514	1.20586	1.27286	1.79689	1.19055
431	421.27	57.32	44.753	36.025	27.759	21.93	0.838048	1.20666	1.2741	1.80679	1.19036	0.841719	1.20686	1.27425	1.79982	1.19152
432	421.392	57.2503	44.751	36.023	27.758	21.8851	0.842832	1.20701	1.27463	1.79381	1.19155	0.840351	1.20559	1.27324	1.79935	1.19026
433	421.016	57.2381	44.742	36.013	27.75	21.8557	0.842298	1.2058	1.2738	1.78568	1.1899	0.838894	1.20516	1.27313	1.79901	1.18936
434	422.258	57.2852	44.734	36.005	27.744	21.9218	0.841069	1.20935	1.27787	1.81313	1.19405	0.83881	1.20536	1.27371	1.79861	1.18945
435	419.513	57.2716	44.73	36.001	27.743	21.929	0.836242	1.20149	1.27002	1.80388	1.18699	0.83833	1.20494	1.27362	1.79945	1.18917
436	420.282	57.3	44.723	35.994	27.738	21.8841	0.835419	1.2037	1.27266	1.79489	1.18671	0.837327	1.20398	1.273	1.80194	1.18857
437	420.257	57.2891	44.718	35.988	27.734	21.8713	0.835761	1.20349	1.27289	1.79209	1.18657	0.836178	1.20342	1.27276	1.80602	1.18825
438	420.299	57.2965	44.708	35.979	27.728	21.9312	0.83469	1.20374	1.27348	1.81263	1.18845	0.835442	1.20259	1.27221	1.8064	1.1876
439	419.133	57.2407	44.704	35.974	27.725	21.94	0.835809	1.20027	1.27025	1.81129	1.18732	0.835022	1.20265	1.27261	1.80832	1.18769
440	419.708	57.2803	44.703	35.973	27.725	21.9413	0.834257	1.20191	1.27215	1.8142	1.18766	0.835191	1.20246	1.27275	1.81086	1.18804
441	420.27	57.2612	44.692	35.962	27.715	21.9288	0.835914	1.20352	1.27401	1.81584	1.18948	0.835258	1.20299	1.27362	1.81317	1.18864
442	419.717	57.28	44.688	35.958	27.714	21.94	0.833302	1.20194	1.2728	1.81727	1.18766	0.835376	1.20338	1.2744	1.81289	1.18894
443	419.897	57.2326	44.685	35.954	27.712	21.9209	0.836606	1.20232	1.27365	1.81268	1.18911	0.834424	1.20353	1.27487	1.81309	1.18861
444	421.617	57.2807	44.676	35.945	27.704	21.8751	0.836227	1.20724	1.27902	1.80832	1.19082	0.835139	1.20463	1.27635	1.8134	1.1896
445	421.437	57.2771	44.667	35.934	27.696	21.8771	0.835518	1.20645	1.27894	1.81063	1.1905	0.835224	1.20569	1.27782	1.81537	1.19043
446	419.606	57.3218	44.67	35.938	27.701	21.914	0.829145	1.20134	1.27354	1.8127	1.18507	0.83471	1.20544	1.2779	1.81498	1.19008
447	422.499	57.2465	44.661	35.929	27.693	21.8779	0.839259	1.20963	1.28247	1.8164	1.19456	0.834744	1.20592	1.27874	1.81717	1.19063
448	422.939	57.293	44.653	35.921	27.688	21.9088	0.836509	1.21089	1.28428	1.82957	1.19528	0.834225	1.2048	1.27788	1.81812	1.19001
449	419.256	57.2776	44.645	35.912	27.681	21.9048	0.829709	1.20021	1.2734	1.81458	1.18525	0.832942	1.20299	1.2762	1.81968	1.18872
450	421.163	57.224	44.642	35.909	27.68	21.92	0.836838	1.20567	1.27951	1.82796	1.19296	0.833238	1.20274	1.27625	1.81909	1.18876
451	418.969	57.2182	44.638	35.905	27.677	21.9062	0.832595	1.19939	1.273	1.81503	1.18648	0.83193	1.20141	1.27521	1.82066	1.18771
452	417.017	57.2453	44.632	35.899	27.672	21.9485	0.826543	1.1938	1.26722	1.82152	1.18146	0.832256	1.20103	1.27519	1.82046	1.18776
453	419.06	57.2259	44.622	35.889	27.665	21.8724	0.831212	1.19965	1.27389	1.80859	1.18534	0.831395	1.20034	1.27478	1.82176	1.1872
454	419.332	57.249	44.62	35.886	27.665	21.9282	0.830101	1.20029	1.27519	1.82738	1.18721	0.830085	1.19984	1.27461	1.82371	1.18657
455	422.156	57.1993	44.617	35.882	27.663	21.89	0.838792	1.20823	1.28409	1.82815	1.1956	0.829825	1.20033	1.27547	1.82609	1.187
456	417.611	57.2891	44.614	35.88	27.663	21.9382	0.823683	1.19536	1.27057	1.8237	1.18133	0.830203	1.20061	1.27619	1.82332	1.18712
457	420.1	57.2962	44.607	35.871	27.655	21.9521	0.827673	1.20221	1.2783	1.84159	1.1886	0.830065	1.20111	1.27716	1.82528	1.18759
458	420.251	57.2475	44.601	35.866	27.652	21.9163	0.830769	1.20278	1.27907	1.83173	1.18946	0.829317	1.20106	1.27745	1.82391	1.18711
459	417.85	57.1991	44.601	35.865	27.654	21.8572	0.82919	1.19577	1.27222	1.80207	1.18231	0.827894	1.20057	1.27729	1.82352	1.18619
460	420.52	57.2615	44.599	35.861	27.652	21.883	0.830247	1.20314	1.28067	1.82232	1.18863	0.828073	1.20122	1.27833	1.82435	1.18675
461	419.343	57.3024	44.593	35.856	27.648	21.8807	0.824868	1.1999	1.27724	1.81777	1.18386	0.828311	1.2013	1.27879	1.82272	1.18682
462	421.109	57.2809	44.579	35.841	27.635	21.8678	0.828831	1.20482	1.28293	1.82544	1.18913	0.827063	1.20044	1.27827	1.82145	1.18572
463	419.407	57.2834	44.573	35.835	27.63	21.8988	0.82493	1.19995	1.2779	1.8295	1.18528	0.826557	1.20106	1.27928	1.82583	1.1863
464	420.48	57.2461	44.571	35.831	27.628	21.8845	0.82934	1.20274	1.28148	1.83023	1.18908	0.825399	1.20026	1.27871	1.82695	1.1855
465	418.387	57.2891	44.565	35.825	27.624	21.8859	0.822036	1.19676	1.27541	1.82284	1.18178	0.825275	1.20016	1.27898	1.82823	1.18561
466	419.559	57.2619	44.558	35.818	27.619	21.8958	0.825647	1.20011	1.2793	1.83272	1.18633	0.824212	1.19915	1.27823	1.82767	1.18459
467	418.602	57.28	44.551	35.812	27.615	21.8969	0.822142	1.19751	1.27669	1.83017	1.18306	0.823512	1.19854	1.27798	1.82715	1.18398
468	419.292	57.2693	44.548	35.807	27.612	21.8737	0.823998	1.19921	1.27911	1.82672	1.18459	0.823046	1.19847	1.27826	1.82891	1.18396
469	418.726	57.2904	44.546	35.806	27.613	21.8661	0.82139	1.19773	1.2777	1.82154	1.18203	0.823009	1.19804	1.27813	1.82951	1.18387
470	418.125	57.2882	44.541	35.799	27.608	21.8829	0.82003	1.19574	1.27617	1.82585	1.18097	0.821326	1.19692	1.27722	1.82743	1.18231
471	420.393	57.2625	44.54	35.798	27.609	21.9049	0.826079	1.20222	1.28341	1.84251	1.18897	0.820253	1.19592	1.27656	1.83005	1.18164
472	417.48	57.2325	44.532	35.789	27.6	21.8875	0.821779	1.19376	1.27451	1.82705	1.18116	0.819694	1.19519	1.27616	1.83038	1.18112
473	416.906	57.3304	44.524	35.782	27.594	21.8615	0.81386	1.19225	1.27292	1.81816	1.17541	0.819735	1.19546	1.2768	1.83371	1.18169
474	416.446	57.2972	44.517	35.772	27.588	21.9559	0.814632	1.19053	1.27214	1.84853	1.17836	0.819186	1.19515	1.27684	1.8372	1.1817
475	417.691	57.2481	44.515	35.77	27.588	21.8788	0.820091	1.19408	1.27625	1.82903	1.18094	0.818168	1.19357	1.27552	1.83459	1.18023
476	419.597	57.2735	44.507	35.763	27.582	21.8959	0.821675	1.19967	1.28223	1.84483	1.18605	0.817903	1.19414	1.27651	1.83863	1.18086
477	417.543	57.2945	44.505	35.759	27.581	21.9394	0.816185	1.19353	1.27642	1.85029	1.181	0.818445	1.19472	1.27759	1.84273	1.18194
478	416.758	57.2232	44.501	35.754	27.577	21.8656	0.818955	1.19114	1.27418	1.82423	1.17869	0.818696	1.1948	1.278	1.84169	1.18207
479	419.024	57.2713	44.495	35.749	27.574	21.9278	0.819923	1.19776	1.28142	1.85533	1.18557	0.817767	1.19413	1.27767	1.84404	1.1816
480	418.608	57.29	44.491	35.743	27.57	21.9036	0.817657	1.1963	1.28046	1.84688	1.18296	0.817176	1.19349	1.27737	1.8424	1.1809
481	416.791	57.2524	44.489	35.741	27.569	21.91	0.816383	1.1911	1.27506	1.84128	1.1793	0.81645	1.19335	1.27757	1.84249	1.18053
482	416.256	57.2747	44.484	35.735	27.566	21.9271	0.813591	1.18944	1.27389	1.84545	1.17761	0.8154	1.19296	1.27751	1.84463	1.1801
483	418.259	57.2672	44.477	35.728	27.56	21.8566	0.817541	1.19516	1.28018	1.83337	1.18117	0.814855	1.19188	1.27675	1.84257	1.17918
484	417.379	57.3385	44.474	35.724	27.558	21.9204	0.811105	1.19251	1.2778	1.85089	1.17844	0.814006	1.1908	1.27599	1.84062	1.17811
485	415.959	57.2799	44.467	35.717	27.553	21.8991	0.811604	1.18845	1.27376	1.83926	1.17566	0.813158	1.19	1.27554	1.84117	1.17743
486	416.623	57.2245	44.462	35.711	27.549	21.891	0.816109	1.19021	1.2761	1.84087	1.17912	0.813683	1.19068	1.27667	1.84347	1.17834
487	416.146	57.2729	44.456	35.704	27.545	21.87	0.811712	1.18872	1.27511	1.83324	1.17546	0.812671	1.18957	1.27588	1.84663	1.1777
488	415.009	57.2549	44.453	35.701	27.544	21.9209	0.810443	1.18547	1.27194	1.84511	1.17453	0.812133	1.18845	1.27509	1.84396	1.1767
489	418.114	57.23	44.44	35.687	27.532	21.9169	0.817267	1.1942	1.28177	1.86156	1.18402	0.811704	1.18872	1.27578	1.84702	1.177
490	415.75	57.2646	44.44	35.687	27.533	21.9313	0.810456	1.18745	1.27468	1.85547	1.17665	0.810376	1.18791	1.27533	1.84809	1.17611
491	414.81	57.28	44.435	35.681	27.53	21.87	0.807337	1.18463	1.27227	1.8322	1.17145	0.809868	1.18785	1.27564	1.85199	1.17629
492	416.817	57.3129	44.426	35.672	27.522	21.9218	0.808604	1.19036	1.27858	1.86071	1.17774	0.809976	1.18879	1.27705	1.85415	1.1771
493	414.823	57.2818	44.428	35.673	27.526	21.9153	0.806812	1.18453	1.27293	1.84835	1.17293	0.808248	1.18744	1.27593	1.85194	1.17539
494	416.147	57.2943	44.421	35.666	27.521	21.9291	0.808158	1.18831	1.27731	1.86049	1.17671	0.808186	1.18803	1.27694	1.85045	1.17557
495	417.51	57.2831	44.416	35.66	27.517	21.9062	0.811198	1.19207	1.28181	1.86029	1.18018	0.808505	1.18865	1.27796	1.85323	1.17639
496	414.896	57.2933	44.411	35.656	27.514	21.8954	0.805169	1.18474	1.27394	1.84608	1.17209	0.807789	1.18744	1.27703	1.85188	1.17538
497	417.344	57.2906	44.41	35.654	27.514	21.8591	0.810025	1.19159	1.28177	1.84506	1.17789	0.807091	1.18689	1.2768	1.85151	1.17479
498	416.461	57.2625	44.402	35.645	27.507	21.8842	0.809572	1.18894	1.27937	1.85166	1.17716	0.807518	1.18714	1.27746	1.85346	1.17541
499	413.992	57.2785	44.399	35.642	27.506	21.9153	0.803586	1.18189	1.2721	1.85125	1.17069	0.807581	1.18648	1.27714	1.85264	1.17513
500	413.673	57.2931	44.397	35.638	27.503	21.9	0.801932	1.18071	1.27128	1.84577	1.16879	0.806868	1.18673	1.27787	1.85606	1.17531
501	416.99	57.2419	44.39	35.63	27.498	21.9356	0.811143	1.19004	1.28194	1.87414	1.18106	0.806535	1.18599	1.2775	1.85751	1.17502
502	416.121	57.2073	44.39	35.629	27.499	21.8894	0.811639	1.18742	1.27959	1.85451	1.17822	0.80691	1.18646	1.27839	1.86099	1.17587
503	415.846	57.3722	44.38	35.618	27.49	21.9306	0.800181	1.1865	1.27905	1.87001	1.17333	0.806611	1.18691	1.27929	1.86318	1.17623
504	415.83	57.24	44.369	35.607	27.48	21.8765	0.807688	1.18646	1.27916	1.85521	1.17587	0.807262	1.18783	1.2807	1.86753	1.17753
505	417.833	57.2261	44.365	35.603	27.478	21.91	0.812202	1.19217	1.28564	1.87605	1.18312	0.806274	1.18744	1.28073	1.86569	1.17673
506	415.379	57.3175	44.361	35.598	27.475	21.9116	0.80149	1.18504	1.2784	1.86658	1.17319	0.804808	1.18624	1.27985	1.86715	1.17562
507	416.215	57.26	44.358	35.593	27.471	21.925	0.806493	1.18715	1.28113	1.87619	1.17791	0.8051	1.18584	1.27982	1.86774	1.17573
508	416.325	57.2948	44.353	35.587	27.469	21.877	0.804226	1.18733	1.2821	1.86126	1.17547	0.804123	1.18528	1.27967	1.86952	1.17522
509	413.421	57.2382	44.341	35.575	27.459	21.9164	0.801378	1.17905	1.27348	1.86475	1.17044	0.802993	1.18463	1.27945	1.86905	1.17436
510	415.104	57.28	44.344	35.577	27.462	21.9247	0.802226	1.18371	1.27882	1.87413	1.17409	0.803242	1.18461	1.27987	1.8703	1.1747
511	414.731	57.2827	44.336	35.568	27.456	21.9046	0.800844	1.18251	1.27814	1.8677	1.17228	0.802753	1.18502	1.28076	1.87112	1.17481
512	416.558	57.28	44.332	35.563	27.453	21.8922	0.804291	1.18759	1.28409	1.87276	1.17713	0.80216	1.18427	1.28035	1.87272	1.17438
513	415.62	57.2688	44.333	35.564	27.455	21.9143	0.803235	1.18491	1.28135	1.87529	1.17558	0.801976	1.18467	1.28123	1.87463	1.17475
514	417.459	57.3187	44.323	35.553	27.446	21.9004	0.803073	1.19002	1.28734	1.88195	1.17866	0.801726	1.18478	1.2818	1.87686	1.17498
515	414.736	57.2743	44.315	35.544	27.439	21.9016	0.80007	1.18212	1.27926	1.87243	1.17247	0.801475	1.18437	1.2818	1.8786	1.17491
516	414.689	57.2686	44.311	35.539	27.437	21.9171	0.800089	1.18185	1.27959	1.87817	1.17305	0.800587	1.1835	1.28128	1.88105	1.17435
517	415.646	57.2871	44.306	35.533	27.433	21.9343	0.80048	1.18445	1.28286	1.88974	1.17571	0.800344	1.18337	1.28158	1.88311	1.17445
518	414	57.2533	44.301	35.527	27.429	21.9233	0.799084	1.17962	1.27809	1.87988	1.17181	0.798948	1.18083	1.27927	1.88125	1.17241
519	414.67	57.2817	44.292	35.518	27.422	21.9367	0.798077	1.18153	1.28048	1.8899	1.17321	0.79865	1.18078	1.27968	1.88149	1.17235
520	415.58	57.26	44.298	35.523	27.428	21.93	0.801535	1.18399	1.28345	1.88969	1.17628	0.798115	1.18006	1.2793	1.88125	1.17178
521	411.501	57.26	44.292	35.516	27.423	21.9186	0.793302	1.17224	1.27116	1.86896	1.16436	0.798019	1.1794	1.27902	1.87813	1.1712
522	414.897	57.2843	44.286	35.509	27.419	21.8843	0.797984	1.18177	1.28213	1.87407	1.17203	0.798063	1.17993	1.28004	1.87907	1.17166
523	413.205	57.255	44.283	35.505	27.415	21.91	0.79634	1.17682	1.2769	1.8765	1.16906	0.797073	1.17838	1.27877	1.87342	1.16993
524	414.303	57.23	44.28	35.501	27.415	21.87	0.799813	1.17981	1.28093	1.86791	1.17167	0.796018	1.17684	1.27756	1.87113	1.16851
525	415.643	57.2757	44.277	35.496	27.411	21.9029	0.799392	1.18336	1.28523	1.88649	1.17503	0.79604	1.17717	1.27839	1.87254	1.16891
526	411.14	57.27	44.278	35.498	27.415	21.86	0.791141	1.17067	1.27162	1.85032	1.16108	0.795673	1.17625	1.2778	1.87407	1.16851
527	412.124	57.2457	44.272	35.49	27.409	21.91	0.794152	1.17321	1.27498	1.87363	1.16631	0.795144	1.17657	1.27865	1.87647	1.16871
528	412.647	57.2686	44.267	35.484	27.405	21.9143	0.793456	1.17456	1.27691	1.87884	1.16718	0.794054	1.17515	1.27757	1.87481	1.16739
529	412.915	57.24	44.262	35.479	27.402	21.925	0.795413	1.17532	1.27806	1.88477	1.16923	0.792879	1.17335	1.27605	1.8764	1.16614
530	414.31	57.3314	44.264	35.479	27.405	21.9343	0.792639	1.17903	1.28285	1.89331	1.17046	0.792573	1.17328	1.27645	1.87968	1.16636
531	411.143	57.23	44.255	35.469	27.397	21.86	0.792183	1.16988	1.27336	1.85634	1.16241	0.791559	1.17287	1.27648	1.87987	1.16573
532	411.47	57.25	44.248	35.462	27.391	21.97	0.791167	1.17081	1.27453	1.89757	1.1663	0.789991	1.17121	1.27516	1.8798	1.16419
533	411.337	57.2714	44.238	35.45	27.381	21.8914	0.789004	1.17017	1.27444	1.87327	1.16263	0.788654	1.17027	1.2746	1.87968	1.1631
534	411.44	57.31	44.241	35.452	27.386	21.9	0.787053	1.17033	1.27523	1.87495	1.16193	0.787809	1.16936	1.27402	1.87708	1.16205
535	408.89	57.305	44.241	35.451	27.387	21.945	0.782475	1.16294	1.26764	1.8784	1.15636	0.785699	1.16846	1.27348	1.88048	1.16089
536	410.937	57.2986	44.229	35.439	27.376	21.9229	0.786057	1.16876	1.27414	1.88395	1.16164	0.784649	1.16746	1.27283	1.87624	1.15953
537	412.343	57.3271	44.224	35.433	27.372	21.8743	0.786725	1.17263	1.27882	1.87506	1.16307	0.784433	1.1677	1.27356	1.87834	1.15983
538	409.2	57.38	44.221	35.429	27.371	21.93	0.777415	1.16356	1.26955	1.88017	1.1543	0.784208	1.16734	1.27359	1.87625	1.15942
539	409.29	57.2714	44.217	35.425	27.368	21.89	0.783814	1.16381	1.26998	1.86788	1.15679	0.784505	1.16767	1.27432	1.8744	1.15964
540	412.227	57.2967	44.21	35.416	27.362	21.9033	0.787494	1.1719	1.27957	1.88795	1.1647	0.784667	1.16761	1.27466	1.87247	1.1596
541	410.835	57.285	44.209	35.414	27.361	21.84	0.785475	1.16781	1.27541	1.86033	1.15908	0.783388	1.16617	1.27356	1.87252	1.15832
542	409.937	57.2667	44.204	35.409	27.357	21.8633	0.784558	1.16525	1.27278	1.8655	1.1579	0.784795	1.16703	1.27489	1.87344	1.15967
543	411.047	57.2543	44.2	35.404	27.354	21.86	0.787188	1.16828	1.27654	1.87044	1.16134	0.785233	1.16775	1.27614	1.87658	1.16064
544	409.14	57.34	44.189	35.391	27.344	21.89	0.777774	1.16259	1.27109	1.87541	1.15413	0.784556	1.16674	1.27543	1.87411	1.15964
545	411.593	57.2614	44.191	35.393	27.347	21.8929	0.78726	1.16956	1.27887	1.88661	1.16372	0.784784	1.16699	1.27619	1.87818	1.16037
546	411.437	57.2557	44.184	35.384	27.34	21.8971	0.786884	1.16886	1.27871	1.8898	1.16361	0.784263	1.16659	1.27627	1.88028	1.16021
547	410.074	57.2771	44.18	35.379	27.336	21.8557	0.782755	1.16485	1.27463	1.87068	1.1577	0.78368	1.16635	1.27649	1.88377	1.16021
548	411.817	57.2567	44.176	35.373	27.334	21.8833	0.787071	1.16954	1.28068	1.88884	1.1642	0.784236	1.16659	1.2772	1.88248	1.16059
549	409.405	57.2717	44.165	35.36	27.322	21.8783	0.78091	1.16242	1.27334	1.88019	1.15673	0.784572	1.16764	1.2789	1.88426	1.16156
550	410.88	57.28	44.163	35.358	27.321	21.9	0.783106	1.16661	1.27809	1.89485	1.16133	0.783266	1.16644	1.27806	1.8825	1.1602
551	410.12	57.2729	44.156	35.35	27.315	21.8214	0.781666	1.16432	1.27604	1.86636	1.15685	0.782597	1.16581	1.27787	1.88349	1.15974
552	414.7	57.2829	44.153	35.344	27.312	21.8529	0.789613	1.17692	1.29077	1.89911	1.17048	0.780913	1.16431	1.27669	1.88311	1.15816
553	408.896	57.2957	44.152	35.343	27.312	21.8671	0.77774	1.16045	1.27287	1.87744	1.15414	0.779838	1.1635	1.27628	1.88333	1.1573
554	408.88	57.2886	44.151	35.342	27.314	21.87	0.778074	1.1604	1.27329	1.87766	1.15442	0.778591	1.16225	1.27544	1.88214	1.15602
555	408.504	57.3157	44.143	35.332	27.306	21.8914	0.775285	1.15907	1.27244	1.88613	1.15318	0.777907	1.16147	1.27515	1.88418	1.15559
556	407.719	57.3157	44.136	35.324	27.301	21.8843	0.773383	1.15671	1.27047	1.88176	1.15073	0.776259	1.15893	1.27288	1.88091	1.15328
557	408.16	57.31	44.133	35.32	27.299	21.89	0.77438	1.15784	1.27216	1.88649	1.15234	0.776072	1.15924	1.27377	1.88346	1.15367
558	408.617	57.2814	44.132	35.317	27.299	21.8671	0.776872	1.15887	1.27406	1.88065	1.15382	0.775004	1.15845	1.27352	1.88299	1.15279
559	408.777	57.2571	44.123	35.307	27.291	21.8443	0.778081	1.15919	1.27488	1.87626	1.15432	0.77613	1.15989	1.27563	1.88582	1.15447
560	410.017	57.32	44.118	35.301	27.287	21.8786	0.77643	1.16258	1.27907	1.89527	1.15689	0.777414	1.16138	1.2778	1.89231	1.15659
561	407.404	57.3371	44.12	35.301	27.291	21.8571	0.770598	1.1549	1.27155	1.87438	1.14826	0.778177	1.16203	1.27909	1.89508	1.1577
562	412.429	57.2814	44.116	35.297	27.287	21.8771	0.783166	1.16915	1.28723	1.90591	1.16491	0.778448	1.16322	1.28088	1.89836	1.15882
563	411.81	57.27	44.111	35.29	27.282	21.94	0.782373	1.16713	1.28562	1.92723	1.16561	0.778068	1.16295	1.28109	1.90318	1.15903
564	410.243	57.2586	44.105	35.282	27.277	21.8957	0.779718	1.16242	1.28121	1.90588	1.1601	0.777724	1.1623	1.28088	1.90658	1.15895
565	411.917	57.3233	44.1	35.277	27.273	21.8633	0.778769	1.16717	1.2866	1.90361	1.16164	0.778491	1.16269	1.28176	1.90707	1.15969
566	408.585	57.27	44.097	35.271	27.268	21.92	0.775421	1.15733	1.27635	1.90999	1.15583	0.777864	1.16117	1.28068	1.90593	1.15865
567	408.83	57.2967	44.092	35.266	27.266	21.94	0.774026	1.15803	1.27759	1.91903	1.1563	0.777165	1.15988	1.27979	1.90303	1.15749
568	408.715	57.255	44.087	35.26	27.263	21.8217	0.775963	1.15757	1.27771	1.87783	1.15348	0.776365	1.15953	1.27991	1.90191	1.15687
569	409.2	57.22	44.084	35.254	27.26	21.87	0.778776	1.15855	1.27971	1.89796	1.15757	0.775849	1.15833	1.27912	1.9039	1.15631
570	409.046	57.2329	44.08	35.25	27.257	21.8943	0.777485	1.15811	1.27939	1.9069	1.1575	0.775727	1.15878	1.28017	1.90688	1.15684
571	409.781	57.3129	44.079	35.247	27.256	21.8586	0.774116	1.15993	1.28201	1.89804	1.1558	0.77578	1.15862	1.28053	1.90451	1.15669
572	409.38	57.2771	44.074	35.242	27.253	21.9157	0.775156	1.1588	1.28107	1.91755	1.1577	0.775169	1.15806	1.28043	1.90855	1.15656
573	410.109	57.3057	44.069	35.234	27.247	21.9371	0.774566	1.16047	1.28368	1.93088	1.15953	0.774367	1.15775	1.28056	1.91187	1.15637
574	408.886	57.2671	44.067	35.231	27.246	21.8729	0.774396	1.15687	1.28017	1.90245	1.15523	0.773269	1.15725	1.28056	1.91309	1.15575
575	407.761	57.28	44.07	35.234	27.251	21.9029	0.771691	1.15369	1.27697	1.90609	1.15261	0.773155	1.15764	1.28148	1.91857	1.15647
576	408.789	57.2771	44.059	35.221	27.241	21.9214	0.773158	1.15634	1.28067	1.92115	1.15622	0.772197	1.15668	1.28095	1.91929	1.15565
577	408.271	57.31	44.051	35.211	27.233	21.9043	0.769801	1.15461	1.27937	1.91543	1.15312	0.771522	1.15563	1.2803	1.91622	1.1546
578	411.124	57.34	44.049	35.209	27.232	21.9243	0.773313	1.16268	1.28847	1.93645	1.16085	0.771097	1.15584	1.28102	1.91839	1.15476
579	407.466	57.3	44.044	35.202	27.227	21.9286	0.768455	1.15207	1.27732	1.92258	1.15196	0.771362	1.1562	1.28192	1.91885	1.15522
580	407.937	57.2914	44.044	35.2	27.227	21.8857	0.769842	1.15315	1.27912	1.90936	1.15218	0.771633	1.15597	1.2822	1.91573	1.15509
581	409.779	57.32	44.04	35.196	27.225	21.8829	0.771421	1.15835	1.28522	1.91767	1.15635	0.771669	1.15619	1.28294	1.9181	1.15552
582	409.05	57.26	44.04	35.195	27.226	21.87	0.773544	1.15616	1.28325	1.90931	1.15583	0.771468	1.15504	1.28221	1.91678	1.15486
583	408.703	57.215	44.032	35.184	27.218	21.8383	0.775058	1.15479	1.28265	1.8993	1.15529	0.771211	1.1541	1.28171	1.91157	1.1539
584	409.213	57.3133	44.028	35.179	27.215	21.92	0.770047	1.1561	1.28457	1.93207	1.15619	0.77085	1.15388	1.28202	1.91175	1.15372
585	408.71	57.265	44.028	35.179	27.217	21.915	0.771908	1.15468	1.28331	1.92715	1.15618	0.769548	1.15182	1.2803	1.91002	1.15197
586	405.55	57.2467	44.022	35.171	27.212	21.8367	0.766654	1.14549	1.27387	1.88616	1.1453	0.768094	1.15037	1.27929	1.90946	1.15054
587	407.807	57.3057	44.019	35.166	27.209	21.8729	0.767321	1.15161	1.28128	1.91059	1.15093	0.767159	1.15017	1.27962	1.91442	1.15048
588	405.12	57.3	44.014	35.16	27.205	21.89	0.762306	1.14389	1.27316	1.90555	1.14408	0.765846	1.14849	1.27832	1.9109	1.14874
589	405.979	57.3057	44.01	35.154	27.201	21.8743	0.763364	1.14606	1.27618	1.90539	1.14581	0.765193	1.14837	1.27879	1.91147	1.14849
590	408.617	57.3014	44.009	35.152	27.202	21.92	0.768515	1.15337	1.28496	1.93401	1.15489	0.764784	1.14929	1.28037	1.91561	1.14918
591	405.451	57.3243	44.002	35.144	27.197	21.8829	0.760852	1.14431	1.27549	1.90742	1.144	0.764239	1.14923	1.28093	1.91748	1.14915
592	408.881	57.3214	44	35.141	27.196	21.9029	0.767338	1.15386	1.2866	1.93118	1.15443	0.764547	1.14946	1.28182	1.91713	1.14952
593	408.234	57.3471	43.985	35.125	27.182	21.8529	0.763789	1.1519	1.28489	1.9151	1.15014	0.765596	1.15082	1.28393	1.92367	1.15147
594	408.14	57.34	43.976	35.113	27.174	21.87	0.763506	1.15125	1.28524	1.92374	1.15066	0.765222	1.14988	1.28346	1.92041	1.15063
595	406.189	57.2614	43.978	35.113	27.176	21.84	0.764465	1.14548	1.27941	1.90306	1.14673	0.76533	1.1501	1.28428	1.92319	1.15116
596	409.801	57.27	43.977	35.111	27.175	21.9243	0.770709	1.15554	1.29096	1.95117	1.15941	0.76456	1.14803	1.28263	1.92072	1.14965
597	406.75	57.25	43.973	35.106	27.172	21.8514	0.765892	1.14681	1.28167	1.91121	1.14906	0.763767	1.14673	1.28173	1.92084	1.14871
598	406.499	57.3114	43.968	35.099	27.167	21.8929	0.761608	1.14584	1.2812	1.92685	1.1477	0.763956	1.1461	1.28158	1.92515	1.14901
599	404.346	57.2329	43.966	35.094	27.166	21.8843	0.761947	1.13939	1.27506	1.91389	1.14388	0.764067	1.14664	1.28269	1.92778	1.14967
600	405.513	57.3371	43.967	35.096	27.167	21.8757	0.758243	1.1428	1.27858	1.91595	1.14353	0.76216	1.14481	1.28116	1.92264	1.14736
601	407.04	57.27	43.965	35.092	27.168	21.96	0.764825	1.14685	1.2842	1.95392	1.15276	0.76194	1.14502	1.28199	1.92597	1.14775
602	407.935	57.285	43.958	35.084	27.161	21.8533	0.765242	1.14924	1.28719	1.92144	1.15133	0.761062	1.1436	1.28095	1.92376	1.1465
603	405.673	57.34	43.949	35.074	27.152	21.8567	0.757362	1.14274	1.28021	1.91524	1.14328	0.760794	1.14365	1.28154	1.9226	1.14637
604	407.771	57.2871	43.95	35.072	27.154	21.8843	0.764353	1.14826	1.28748	1.9345	1.1518	0.760724	1.1434	1.28189	1.92163	1.14625
605	403.426	57.2943	43.944	35.065	27.148	21.8714	0.755463	1.1359	1.27392	1.9114	1.13889	0.759564	1.14281	1.2818	1.91674	1.145
606	404.939	57.2571	43.938	35.056	27.142	21.83	0.760069	1.13977	1.27918	1.90577	1.14302	0.75841	1.14159	1.28108	1.91931	1.14412
607	405.43	57.31	43.934	35.051	27.139	21.83	0.757756	1.14103	1.28106	1.90916	1.1427	0.758915	1.14186	1.28204	1.92175	1.14488
608	406.121	57.3514	43.934	35.049	27.139	21.85	0.756705	1.14272	1.28357	1.91965	1.14396	0.757578	1.14045	1.28106	1.92183	1.14357
609	405.454	57.3143	43.927	35.041	27.135	21.9086	0.757163	1.14071	1.28211	1.93944	1.14517	0.75802	1.14108	1.28239	1.92483	1.14451
610	406.943	57.2986	43.928	35.04	27.135	21.87	0.760893	1.14464	1.28698	1.9323	1.14863	0.75711	1.14037	1.28218	1.92804	1.14406
611	404.77	57.33	43.927	35.038	27.136	21.9067	0.754999	1.1384	1.28059	1.93509	1.14266	0.756702	1.13955	1.28192	1.93017	1.14376
612	405.493	57.285	43.921	35.031	27.131	21.885	0.758555	1.14031	1.28321	1.93239	1.14546	0.756402	1.13847	1.28135	1.93185	1.14335
613	403.62	57.31	43.922	35.03	27.133	21.9	0.753697	1.13478	1.27776	1.92824	1.13985	0.755878	1.13773	1.28118	1.93429	1.14304
614	403.929	57.2929	43.916	35.021	27.127	21.8786	0.754902	1.13527	1.27923	1.92405	1.14058	0.754953	1.13623	1.28012	1.9311	1.14164
615	403.93	57.2971	43.915	35.019	27.127	21.8986	0.754606	1.13515	1.27956	1.93141	1.14109	0.754685	1.13546	1.27988	1.93209	1.14133
616	404.166	57.3157	43.906	35.008	27.12	21.9557	0.753494	1.13555	1.28095	1.95654	1.143	0.753712	1.13464	1.27961	1.92858	1.14021
617	403.674	57.28	43.903	35.005	27.118	21.8343	0.754419	1.13417	1.27956	1.90999	1.13885	0.753888	1.13486	1.28043	1.92794	1.14047
618	403.357	57.2886	43.899	34.999	27.114	21.9214	0.753118	1.13303	1.27887	1.94199	1.14049	0.753607	1.13503	1.28123	1.93189	1.14085
619	403.99	57.33	43.895	34.993	27.111	21.8171	0.751749	1.13455	1.28137	1.90782	1.13759	0.753233	1.13455	1.28133	1.93215	1.14056
620	404.61	57.29	43.891	34.989	27.108	21.85	0.754926	1.13629	1.2835	1.92378	1.14168	0.752255	1.13347	1.28066	1.92784	1.13922
621	404.808	57.325	43.884	34.979	27.102	21.9167	0.752936	1.13646	1.28478	1.9517	1.14326	0.751288	1.13276	1.28052	1.93201	1.13882
622	403.24	57.2857	43.88	34.973	27.099	21.8843	0.751993	1.13181	1.28029	1.93318	1.13905	0.750863	1.13267	1.28111	1.93199	1.13867
623	401.916	57.3314	43.874	34.966	27.093	21.8771	0.746643	1.12796	1.27625	1.92641	1.13362	0.751009	1.13285	1.28192	1.93618	1.13933
624	402.491	57.3286	43.87	34.959	27.089	21.9	0.747649	1.1292	1.27856	1.93916	1.13606	0.750945	1.13252	1.28226	1.93879	1.1395
625	403.734	57.3271	43.872	34.959	27.092	21.8943	0.750149	1.13243	1.283	1.94188	1.13943	0.750402	1.13196	1.28224	1.93929	1.13909
626	405.02	57.32	43.869	34.954	27.087	21.86	0.752769	1.13578	1.28709	1.93715	1.14219	0.749671	1.13201	1.28291	1.94163	1.13901
627	404.47	57.2643	43.862	34.945	27.081	21.8743	0.75448	1.13399	1.28583	1.94206	1.14289	0.750207	1.13238	1.28397	1.94502	1.13991
628	404.013	57.3457	43.863	34.945	27.083	21.9171	0.749131	1.13258	1.2847	1.95521	1.14036	0.750256	1.13198	1.28411	1.94432	1.13981
629	403.94	57.38	43.859	34.939	27.08	21.9	0.746875	1.13212	1.28496	1.94952	1.1385	0.750943	1.13244	1.28526	1.94494	1.1406
630	403.423	57.2933	43.853	34.932	27.075	21.9033	0.750397	1.13054	1.28364	1.95016	1.13994	0.75041	1.13125	1.28455	1.94581	1.13993
631	402.042	57.2883	43.851	34.928	27.073	21.8767	0.747994	1.12642	1.27957	1.93426	1.13534	0.749919	1.13069	1.28459	1.94583	1.13951
632	405.44	57.28	43.854	34.929	27.078	21.87	0.754953	1.13569	1.29105	1.94624	1.14499	0.749484	1.12953	1.28393	1.94273	1.13857
633	402.533	57.29	43.855	34.929	27.08	21.9014	0.749038	1.12742	1.28212	1.94326	1.13747	0.749646	1.1284	1.28331	1.94011	1.13803
634	403.619	57.2843	43.849	34.92	27.074	21.8786	0.751042	1.13008	1.28606	1.94218	1.13998	0.748679	1.12741	1.28284	1.93561	1.13674
635	401.699	57.3071	43.847	34.916	27.071	21.8771	0.746089	1.12445	1.28011	1.93353	1.13378	0.748267	1.12707	1.28316	1.93733	1.13662
636	401.711	57.27	43.844	34.911	27.069	21.8686	0.74801	1.12423	1.28064	1.93115	1.13473	0.746589	1.12522	1.2817	1.93479	1.13468
637	401.517	57.3286	43.83	34.896	27.056	21.8243	0.743629	1.12356	1.28035	1.91867	1.1309	0.746059	1.1247	1.28177	1.93753	1.13449
638	401.817	57.3129	43.831	34.894	27.057	21.8957	0.745107	1.12403	1.2818	1.9463	1.13453	0.74603	1.12518	1.28291	1.93932	1.13497
639	401.42	57.32	43.817	34.879	27.044	21.84	0.743205	1.12279	1.28086	1.92842	1.1314	0.745576	1.12458	1.2829	1.93919	1.13454
640	401.857	57.2971	43.818	34.878	27.045	21.9257	0.745331	1.12376	1.28258	1.96247	1.13611	0.744482	1.124	1.28293	1.94276	1.13407
641	405.349	57.3186	43.822	34.881	27.05	21.8657	0.750836	1.1334	1.29405	1.9547	1.14335	0.744019	1.12325	1.28277	1.94511	1.13378
642	400.754	57.3029	43.817	34.874	27.047	21.8629	0.742916	1.1203	1.28004	1.9326	1.1308	0.743369	1.12234	1.28233	1.94435	1.13302
643	400.847	57.3457	43.81	34.864	27.04	21.9171	0.740351	1.12019	1.28083	1.95617	1.13142	0.743445	1.12196	1.28256	1.9481	1.13333
644	400.247	57.3229	43.808	34.86	27.038	21.8671	0.740384	1.11826	1.27924	1.93511	1.12886	0.743197	1.12185	1.2831	1.94511	1.13301
645	400.08	57.31	43.804	34.855	27.033	21.88	0.74056	1.11767	1.2787	1.94101	1.12921	0.742802	1.12087	1.28267	1.94491	1.13244
646	401.064	57.2814	43.8	34.849	27.031	21.9014	0.743735	1.12017	1.2825	1.95467	1.13359	0.742635	1.12058	1.28295	1.94769	1.13255
647	402.167	57.32	43.799	34.846	27.03	21.8514	0.743597	1.123	1.28636	1.9415	1.13387	0.74291	1.12059	1.28357	1.94691	1.13277
648	403.48	57.285	43.801	34.847	27.034	21.87	0.748072	1.12654	1.29105	1.95333	1.13929	0.744692	1.12268	1.28659	1.94928	1.13513
649	400.593	57.2967	43.795	34.839	27.027	21.8967	0.741748	1.11823	1.28198	1.95208	1.13162	0.745044	1.12259	1.28719	1.94904	1.1354
650	401.423	57.31	43.79	34.832	27.023	21.8783	0.742277	1.12029	1.28513	1.95068	1.13295	0.744388	1.12187	1.28707	1.94795	1.13472
651	406.03	57.27	43.787	34.827	27.021	21.82	0.752855	1.1329	1.30038	1.95169	1.14536	0.743262	1.12028	1.28594	1.94846	1.13348
652	400.429	57.26	43.787	34.825	27.022	21.86	0.74302	1.11702	1.28293	1.93931	1.13115	0.742438	1.11926	1.28546	1.9493	1.13272
653	399.877	57.31	43.785	34.82	27.02	21.8857	0.739144	1.11511	1.28166	1.94709	1.12882	0.74171	1.11911	1.28597	1.95064	1.13247
654	398.77	57.3314	43.781	34.815	27.017	21.8914	0.735715	1.11189	1.27844	1.945	1.1252	0.741748	1.11901	1.28657	1.9532	1.1328
655	401.549	57.3057	43.782	34.814	27.018	21.8943	0.742305	1.11939	1.28767	1.95927	1.13395	0.739883	1.11672	1.28469	1.95134	1.1306
656	400.784	57.3786	43.777	34.808	27.014	21.9057	0.736651	1.11714	1.28555	1.96144	1.12983	0.739155	1.11639	1.28504	1.95162	1.13019
657	401.819	57.3014	43.773	34.801	27.01	21.9071	0.742545	1.11965	1.28937	1.9686	1.13526	0.73948	1.11681	1.28622	1.95145	1.1307
658	400.944	57.32	43.771	34.796	27.009	21.8386	0.739804	1.11684	1.28722	1.93864	1.13001	0.739608	1.11681	1.28693	1.95195	1.13095
659	400.264	57.3286	43.768	34.791	27.006	21.8514	0.737919	1.11469	1.28537	1.94131	1.12823	0.739157	1.11668	1.2875	1.95223	1.13079
660	401.514	57.3057	43.767	34.789	27.007	21.8486	0.741419	1.11805	1.28988	1.94591	1.13239	0.739044	1.11565	1.28706	1.95171	1.13033
661	399.403	57.3214	43.766	34.786	27.006	21.8814	0.736611	1.11192	1.28343	1.94847	1.12698	0.737896	1.11458	1.28653	1.9496	1.12911
662	401.857	57.3529	43.761	34.779	27.001	21.8786	0.739151	1.11851	1.29165	1.96126	1.13281	0.736271	1.11251	1.28483	1.94969	1.1273
663	398.856	57.3157	43.765	34.781	27.006	21.9129	0.735857	1.10991	1.28249	1.95781	1.12662	0.736211	1.11268	1.28572	1.95316	1.12777
664	399.75	57.36	43.754	34.768	26.995	21.88	0.734511	1.11215	1.2857	1.95381	1.12669	0.735186	1.1114	1.28493	1.95372	1.12674
665	396.353	57.355	43.752	34.763	26.993	21.8833	0.72843	1.10233	1.27527	1.93923	1.11738	0.735706	1.11197	1.28627	1.95414	1.12748
666	401.277	57.3467	43.744	34.754	26.987	21.8833	0.737496	1.1159	1.29161	1.96563	1.13153	0.73487	1.11016	1.28487	1.95426	1.12627
667	398.93	57.325	43.742	34.75	26.985	21.87	0.734245	1.10912	1.28439	1.9498	1.12517	0.733528	1.1085	1.28368	1.95202	1.12464
668	401.481	57.3	43.741	34.746	26.982	21.8386	0.740249	1.11585	1.29277	1.95143	1.13216	0.733006	1.10745	1.28321	1.95312	1.12406
669	397.944	57.3029	43.736	34.74	26.979	21.9086	0.733302	1.10589	1.28187	1.96208	1.12432	0.733841	1.10778	1.28432	1.95248	1.12479
670	395.34	57.34	43.735	34.736	26.979	21.89	0.726461	1.09829	1.27414	1.94213	1.1152	0.732603	1.10577	1.28275	1.9498	1.12302
671	397.751	57.3386	43.733	34.732	26.978	21.9086	0.730861	1.10474	1.28241	1.96152	1.12264	0.731577	1.10447	1.28197	1.94923	1.12189
672	397.807	57.2743	43.73	34.727	26.976	21.8357	0.734271	1.10465	1.28308	1.93475	1.12253	0.730489	1.10303	1.28106	1.95061	1.12082
673	396.927	57.3371	43.722	34.716	26.967	21.87	0.728834	1.10184	1.28058	1.94687	1.11914	0.72958	1.10207	1.28065	1.94612	1.11959
674	396.31	57.3471	43.72	34.713	26.966	21.8743	0.72706	1.10001	1.27891	1.94586	1.11722	0.729582	1.10206	1.28131	1.94565	1.11967
675	398.533	57.3183	43.719	34.709	26.964	21.8833	0.732634	1.10581	1.28642	1.96103	1.12469	0.729236	1.10143	1.28125	1.94491	1.11923
676	396.18	57.34	43.715	34.704	26.96	21.83	0.726936	1.09916	1.27899	1.9307	1.11569	0.728356	1.10069	1.28101	1.94805	1.11874
677	395.967	57.3343	43.708	34.694	26.953	21.8471	0.726477	1.0982	1.2788	1.93879	1.1158	0.728504	1.1006	1.2815	1.95106	1.11914
678	396.84	57.3286	43.709	34.693	26.954	21.8829	0.728437	1.10038	1.28195	1.95636	1.11957	0.729726	1.10179	1.28352	1.95312	1.12073
679	396.583	57.3257	43.709	34.691	26.954	21.8871	0.728118	1.09942	1.28145	1.95675	1.11907	0.728871	1.10058	1.28278	1.95332	1.11978
680	397.273	57.3157	43.708	34.689	26.954	21.9071	0.729867	1.10121	1.28401	1.96792	1.12197	0.729113	1.10071	1.28371	1.9596	1.12065
681	399.951	57.2914	43.699	34.678	26.945	21.8443	0.735614	1.10839	1.293	1.96027	1.1283	0.728756	1.10015	1.28374	1.96427	1.12068
682	396.071	57.3257	43.699	34.675	26.947	21.9014	0.726645	1.09727	1.28129	1.96247	1.11808	0.728921	1.10022	1.28456	1.96718	1.12119
683	397.22	57.33	43.701	34.674	26.949	21.92	0.72863	1.10009	1.2855	1.97465	1.12177	0.729133	1.10019	1.28526	1.96669	1.1214
684	395.16	57.3433	43.698	34.67	26.946	21.935	0.723984	1.09426	1.279	1.97146	1.11601	0.728649	1.09911	1.2848	1.96448	1.12057
685	397.636	57.3243	43.699	34.669	26.949	21.92	0.729592	1.10087	1.28768	1.97671	1.12313	0.726773	1.0963	1.28234	1.96172	1.11804
686	397.12	57.3014	43.694	34.662	26.944	21.8614	0.729601	1.0992	1.28634	1.95334	1.12054	0.726218	1.09551	1.28221	1.96017	1.11735
687	395.256	57.2929	43.691	34.656	26.941	21.88	0.726474	1.09368	1.2808	1.95246	1.11614	0.725601	1.09403	1.2812	1.95629	1.1161
688	393.544	57.3157	43.698	34.661	26.949	21.88	0.722486	1.0887	1.27575	1.94094	1.11059	0.72524	1.09321	1.28098	1.95237	1.11531
689	394.77	57.35	43.695	34.655	26.947	21.89	0.722757	1.09173	1.28039	1.9516	1.11328	0.724314	1.09161	1.27985	1.94953	1.1139
690	394.11	57.2929	43.69	34.649	26.942	21.8829	0.724315	1.08979	1.27842	1.94751	1.11299	0.723134	1.09003	1.27875	1.95157	1.11275
691	393.719	57.3271	43.684	34.641	26.936	21.8729	0.721459	1.08846	1.27748	1.94404	1.1105	0.722547	1.08947	1.27883	1.94948	1.1121
692	394.265	57.31	43.679	34.634	26.932	21.895	0.723104	1.08973	1.27975	1.95684	1.11327	0.723257	1.08957	1.27963	1.94572	1.11238
693	393.777	57.3233	43.676	34.629	26.93	21.9267	0.721344	1.08814	1.27866	1.96757	1.11247	0.722795	1.08805	1.27848	1.94686	1.11158
694	394.448	57.3333	43.682	34.633	26.937	21.8483	0.722362	1.08976	1.28134	1.93788	1.11159	0.721782	1.08747	1.27849	1.9484	1.11096
695	394.4	57.23	43.676	34.625	26.93	21.78	0.727461	1.08938	1.28135	1.91456	1.11255	0.721316	1.08713	1.27878	1.94739	1.11056
696	391.479	57.27	43.668	34.615	26.923	21.9286	0.719524	1.08107	1.27236	1.95958	1.1077	0.720798	1.08725	1.27971	1.94931	1.11062
697	393.256	57.3686	43.661	34.606	26.916	21.8957	0.717224	1.08574	1.27846	1.95833	1.10861	0.719768	1.08582	1.2788	1.94618	1.10921
698	393.473	57.3586	43.662	34.605	26.917	21.8386	0.718196	1.0861	1.2795	1.93698	1.10775	0.719315	1.08515	1.27874	1.94788	1.10889
699	395.313	57.3971	43.661	34.599	26.916	21.9	0.719476	1.09058	1.28632	1.97026	1.11365	0.718287	1.08422	1.27845	1.95335	1.10844
700	390.839	57.3443	43.662	34.599	26.919	21.8971	0.714132	1.07812	1.27226	1.94569	1.1026	0.718251	1.08451	1.27955	1.95052	1.10847
701	393.403	57.3371	43.662	34.598	26.92	21.8757	0.719193	1.08507	1.28094	1.94975	1.10938	0.719174	1.0851	1.28108	1.94814	1.10927
702	392.737	57.2857	43.654	34.587	26.912	21.8843	0.720264	1.08288	1.27927	1.95286	1.10938	0.719104	1.08474	1.28149	1.95031	1.10939
703	392.89	57.3129	43.657	34.588	26.915	21.8514	0.71927	1.08306	1.28011	1.93979	1.10794	0.718051	1.08324	1.28046	1.94831	1.10801
704	395.454	57.3171	43.656	34.585	26.916	21.8243	0.723684	1.08989	1.28913	1.94166	1.11418	0.718017	1.08298	1.28091	1.94763	1.10795
705	393.291	57.3486	43.649	34.575	26.908	21.8714	0.717708	1.08357	1.28242	1.95218	1.10858	0.716756	1.08108	1.27945	1.94723	1.1064
706	392.119	57.4071	43.641	34.565	26.901	21.89	0.712107	1.0801	1.27909	1.95629	1.10403	0.716206	1.07995	1.2789	1.94348	1.10537
707	390.881	57.3314	43.643	34.564	26.902	21.8671	0.71389	1.07633	1.27539	1.94088	1.10218	0.715797	1.07958	1.27928	1.94584	1.10529
708	389.31	57.34	43.639	34.558	26.899	21.9	0.710368	1.07177	1.27076	1.94694	1.0985	0.714654	1.07764	1.27777	1.94529	1.10377
709	390.588	57.27	43.64	34.556	26.9	21.8317	0.716413	1.07493	1.27543	1.92661	1.10216	0.714178	1.0768	1.2775	1.943	1.10304
710	392.68	57.34	43.637	34.551	26.898	21.88	0.716412	1.08045	1.28276	1.95636	1.10739	0.714132	1.07652	1.27791	1.93949	1.10273
711	391.275	57.3	43.632	34.544	26.893	21.845	0.715677	1.07635	1.27851	1.93777	1.10358	0.713694	1.07642	1.27859	1.94062	1.10266
712	391.806	57.3414	43.63	34.541	26.892	21.8329	0.714378	1.07769	1.28058	1.93613	1.10341	0.714261	1.07702	1.28008	1.93998	1.10338
713	392.073	57.3957	43.625	34.533	26.887	21.8129	0.711787	1.07807	1.28195	1.93172	1.10186	0.713117	1.07625	1.2799	1.94363	1.10276
714	391.32	57.38	43.617	34.522	26.88	21.86	0.710819	1.07565	1.28016	1.9488	1.10169	0.712202	1.07471	1.27885	1.94267	1.10153
715	391.529	57.3214	43.619	34.522	26.882	21.8429	0.714342	1.07598	1.28118	1.94244	1.10356	0.711402	1.07378	1.27846	1.94223	1.1007
716	389.277	57.3529	43.615	34.516	26.878	21.8929	0.708402	1.06956	1.27415	1.95219	1.09779	0.710745	1.07203	1.27722	1.94429	1.09978
717	389.453	57.32	43.607	34.505	26.871	21.8771	0.710007	1.06969	1.27539	1.94966	1.09882	0.710768	1.07128	1.27713	1.94324	1.0995
718	389.539	57.3186	43.604	34.501	26.868	21.8343	0.710082	1.06981	1.27584	1.93465	1.09778	0.710751	1.07064	1.27711	1.9448	1.09944
719	388.133	57.275	43.604	34.497	26.868	21.8933	0.709775	1.06548	1.2719	1.95055	1.09699	0.71002	1.06926	1.27621	1.94525	1.09851
720	390.89	57.33	43.604	34.495	26.868	21.79	0.711952	1.07281	1.28127	1.92443	1.09986	0.70986	1.06904	1.27672	1.94399	1.09835
721	390.423	57.3357	43.602	34.49	26.865	21.8843	0.710702	1.07118	1.28007	1.95967	1.10129	0.70977	1.0685	1.27681	1.94291	1.09808
722	388.723	57.3014	43.599	34.485	26.862	21.8671	0.709223	1.06628	1.27484	1.94562	1.09702	0.709536	1.06801	1.27702	1.94307	1.09786
723	389.443	57.3614	43.596	34.48	26.86	21.85	0.707284	1.06802	1.2777	1.94333	1.09667	0.708831	1.06805	1.27779	1.94132	1.09746
724	388.796	57.2971	43.595	34.476	26.859	21.8543	0.70937	1.06589	1.27608	1.94215	1.09696	0.707822	1.06676	1.27698	1.94464	1.09663
725	389.059	57.3243	43.595	34.474	26.859	21.8343	0.708446	1.06638	1.27728	1.93572	1.09625	0.707381	1.06522	1.27589	1.94108	1.09547
726	388.919	57.3886	43.594	34.471	26.859	21.8429	0.70484	1.06576	1.27732	1.93833	1.09414	0.706996	1.06453	1.27583	1.9434	1.09523
727	388.28	57.36	43.589	34.464	26.854	21.87	0.704887	1.06378	1.27556	1.94763	1.09405	0.707193	1.06471	1.27684	1.94569	1.09576
728	387.235	57.27	43.589	34.46	26.852	21.8483	0.707615	1.06045	1.27246	1.93476	1.09322	0.707102	1.06497	1.27794	1.95018	1.09633
729	387.667	57.3033	43.586	34.455	26.85	21.91	0.706527	1.0614	1.27438	1.96188	1.09531	0.706852	1.06457	1.27823	1.95454	1.09647
730	390.677	57.3671	43.585	34.451	26.849	21.8643	0.708665	1.06929	1.28478	1.95938	1.10041	0.707509	1.06425	1.2786	1.95465	1.09686
731	390.23	57.35	43.585	34.448	26.849	21.9057	0.708736	1.06772	1.28382	1.97354	1.10097	0.707259	1.06385	1.27896	1.95636	1.09681
732	388.747	57.3343	43.582	34.444	26.847	21.9043	0.706696	1.06355	1.27928	1.96626	1.09723	0.706505	1.0635	1.27933	1.95663	1.09635
733	388.83	57.28	43.578	34.438	26.843	21.83	0.70944	1.06354	1.27989	1.93911	1.09684	0.705817	1.06308	1.27965	1.95372	1.09565
734	388.034	57.3686	43.572	34.429	26.839	21.8886	0.703135	1.06101	1.27811	1.9596	1.09367	0.70538	1.06202	1.27918	1.95262	1.09494
735	387.001	57.3486	43.573	34.428	26.84	21.8443	0.702333	1.05796	1.27504	1.93667	1.09001	0.704482	1.06061	1.27826	1.95149	1.09376
736	387.33	57.3714	43.572	34.424	26.839	21.8514	0.701714	1.05851	1.27663	1.94148	1.09046	0.703978	1.05923	1.27736	1.94962	1.09278
737	388.64	57.3367	43.567	34.417	26.835	21.8567	0.705609	1.06186	1.28146	1.95166	1.09538	0.702391	1.05757	1.27622	1.94885	1.09111
738	387.31	57.3483	43.564	34.411	26.831	21.905	0.702446	1.05788	1.27741	1.96564	1.09276	0.702691	1.05698	1.27631	1.94712	1.09102
739	385.87	57.28	43.561	34.407	26.829	21.89	0.703167	1.05383	1.27299	1.95318	1.09034	0.703131	1.05719	1.27733	1.94995	1.09175
740	385.38	57.3614	43.565	34.406	26.831	21.8486	0.698333	1.05192	1.27188	1.9337	1.08518	0.703359	1.05682	1.2776	1.95192	1.09199
741	387.304	57.2986	43.569	34.408	26.836	21.8643	0.705237	1.05694	1.27874	1.94754	1.09302	0.70248	1.05553	1.27683	1.95082	1.09089
742	388.25	57.3257	43.566	34.404	26.834	21.8729	0.705411	1.0594	1.2822	1.95645	1.09512	0.702377	1.05463	1.27653	1.94885	1.09038
743	387.091	57.3186	43.559	34.394	26.825	21.8757	0.703313	1.0559	1.27854	1.95529	1.09216	0.701539	1.05424	1.2769	1.94661	1.08966
744	386.139	57.3614	43.56	34.391	26.826	21.86	0.699454	1.05284	1.27607	1.94391	1.08767	0.702292	1.05467	1.27824	1.94633	1.09045
745	385.759	57.3043	43.561	34.39	26.828	21.8871	0.701722	1.05157	1.27532	1.95188	1.08919	0.701182	1.05361	1.27772	1.94581	1.08937
746	385.72	57.38	43.551	34.377	26.817	21.84	0.697303	1.05112	1.27553	1.93751	1.08531	0.700259	1.05245	1.27708	1.94382	1.08823
747	387.251	57.3086	43.549	34.372	26.816	21.8043	0.703604	1.05495	1.28127	1.93173	1.09072	0.699753	1.05213	1.27754	1.94623	1.0881
748	385.286	57.3571	43.547	34.369	26.815	21.86	0.697469	1.04948	1.2751	1.94392	1.0854	0.699479	1.05209	1.27828	1.94932	1.0883
749	385.98	57.3457	43.54	34.361	26.809	21.8414	0.69895	1.05126	1.27774	1.9425	1.08714	0.69836	1.05096	1.27761	1.94755	1.08706
750	386.993	57.3657	43.54	34.358	26.81	21.9043	0.69977	1.05367	1.28177	1.97215	1.09131	0.698226	1.05083	1.27818	1.94748	1.08704
751	386.721	57.3943	43.534	34.349	26.803	21.8843	0.697535	1.05259	1.28121	1.96556	1.08905	0.697203	1.05009	1.27797	1.95228	1.08656
752	383.47	57.35	43.534	34.348	26.803	21.86	0.693888	1.04363	1.27061	1.93946	1.0805	0.696939	1.04986	1.27846	1.95559	1.08669
753	386.017	57.3843	43.526	34.337	26.795	21.8129	0.696365	1.05022	1.27956	1.937	1.08519	0.696779	1.04934	1.27869	1.95654	1.08657
754	385.943	57.38	43.526	34.335	26.796	21.8867	0.696447	1.04979	1.27982	1.96536	1.08737	0.696602	1.04879	1.27879	1.95502	1.08621
755	385.4	57.38	43.529	34.334	26.798	21.9	0.695618	1.04785	1.27853	1.96713	1.08625	0.696717	1.04788	1.27847	1.95198	1.08574
756	385.49	57.3333	43.523	34.324	26.791	21.8467	0.697829	1.04764	1.27934	1.94915	1.0863	0.697226	1.04846	1.28002	1.95366	1.08662
757	386.337	57.3517	43.525	34.325	26.794	21.87	0.698535	1.04983	1.28249	1.9615	1.08883	0.697261	1.04777	1.28007	1.95526	1.08659
758	385.12	57.31	43.523	34.32	26.792	21.84	0.698339	1.04618	1.27896	1.94426	1.08576	0.696993	1.04694	1.27989	1.9544	1.0861
759	385.767	57.3429	43.515	34.31	26.784	21.8414	0.697446	1.04771	1.28145	1.95125	1.08662	0.697365	1.04671	1.2804	1.95311	1.08626
760	385.091	57.3371	43.517	34.308	26.786	21.8443	0.696613	1.04542	1.27988	1.94817	1.08498	0.696515	1.04574	1.27997	1.95092	1.08524
761	384.594	57.3529	43.51	34.3	26.78	21.8729	0.694572	1.04396	1.27857	1.95936	1.08397	0.696527	1.04532	1.28027	1.95279	1.08533
762	385.557	57.32	43.515	34.302	26.784	21.8614	0.69822	1.04623	1.28211	1.95811	1.08735	0.69624	1.04543	1.28119	1.95576	1.08558
763	383.659	57.3729	43.51	34.295	26.78	21.82	0.691882	1.04085	1.27631	1.93376	1.07912	0.695334	1.04429	1.28061	1.95548	1.08459
764	386	57.32	43.507	34.289	26.777	21.89	0.698617	1.04686	1.28461	1.97463	1.08947	0.69465	1.04371	1.28067	1.95719	1.08416
765	386.134	57.3671	43.504	34.284	26.774	21.8614	0.696333	1.047	1.2854	1.96503	1.08753	0.694258	1.04224	1.27973	1.95412	1.08312
766	383.561	57.38	43.505	34.282	26.775	21.8557	0.691102	1.03969	1.27735	1.94927	1.07972	0.693571	1.04118	1.27926	1.95669	1.08253
767	384.299	57.3971	43.51	34.284	26.78	21.8786	0.691824	1.04135	1.28031	1.96014	1.08197	0.693184	1.04074	1.27956	1.96009	1.08249
768	381.647	57.2943	43.503	34.273	26.772	21.8486	0.691827	1.03371	1.27199	1.93791	1.07671	0.692974	1.03978	1.27922	1.95881	1.08194
769	383.604	57.3343	43.504	34.272	26.773	21.92	0.693414	1.03879	1.27885	1.97612	1.08319	0.692408	1.03839	1.27839	1.95503	1.08078
770	383.311	57.4057	43.501	34.267	26.771	21.8757	0.689175	1.03777	1.27839	1.95755	1.07884	0.693096	1.03857	1.27943	1.95502	1.08143
771	384.32	57.28	43.498	34.261	26.768	21.88	0.697141	1.04016	1.28226	1.96563	1.08565	0.692877	1.03776	1.27921	1.95363	1.08094
772	383.373	57.3417	43.499	34.259	26.769	21.825	0.692376	1.03727	1.27962	1.93858	1.07942	0.692704	1.03808	1.28036	1.95509	1.08124
773	384.803	57.3167	43.493	34.251	26.762	21.8267	0.695914	1.04091	1.28456	1.94923	1.08426	0.691942	1.03705	1.27984	1.95439	1.08034
774	382.975	57.36	43.49	34.246	26.759	21.85	0.690294	1.03574	1.2788	1.95037	1.0785	0.691971	1.03652	1.27998	1.95242	1.08009
775	383.203	57.3629	43.491	34.243	26.759	21.8414	0.690612	1.03591	1.28007	1.94813	1.07879	0.691006	1.03588	1.27993	1.95062	1.07919
776	381.683	57.3657	43.498	34.248	26.765	21.9243	0.688078	1.03158	1.27517	1.97121	1.07694	0.69102	1.03583	1.28062	1.95263	1.07946
777	382.69	57.37	43.492	34.24	26.762	21.84	0.689382	1.03407	1.27939	1.94377	1.07709	0.689886	1.03449	1.27973	1.95143	1.07815
778	383.336	57.3743	43.493	34.24	26.764	21.8571	0.690382	1.03571	1.28189	1.95306	1.0793	0.689917	1.03435	1.28043	1.95099	1.07823
779	383.949	57.3514	43.49	34.233	26.76	21.8443	0.692477	1.03691	1.28445	1.95266	1.08133	0.689734	1.0337	1.28045	1.94907	1.07779
780	382.02	57.37	43.488	34.229	26.758	21.8371	0.687977	1.03148	1.27834	1.94082	1.07512	0.68946	1.03245	1.27979	1.94181	1.07661
781	383.373	57.37	43.49	34.228	26.762	21.84	0.690513	1.0348	1.28373	1.94724	1.07901	0.689261	1.03148	1.2794	1.93875	1.07592
782	382.22	57.345	43.483	34.218	26.754	21.815	0.689331	1.03135	1.28021	1.9347	1.07577	0.688696	1.03019	1.2787	1.93889	1.07511
783	379.17	57.3	43.485	34.217	26.756	21.82	0.686156	1.02279	1.27051	1.92043	1.06869	0.687958	1.02867	1.27764	1.93764	1.07397
784	380.913	57.3214	43.48	34.21	26.751	21.7971	0.687994	1.02727	1.27669	1.9223	1.07226	0.687161	1.0277	1.27733	1.93765	1.07316
785	380.833	57.3471	43.477	34.204	26.748	21.8757	0.686426	1.02673	1.27693	1.95408	1.07363	0.686826	1.02662	1.27678	1.93858	1.07264
786	380.774	57.3271	43.477	34.201	26.747	21.85	0.687311	1.02624	1.27708	1.94392	1.07329	0.686665	1.02632	1.2772	1.94349	1.07291
787	380.337	57.4029	43.469	34.19	26.739	21.84	0.682397	1.02473	1.27613	1.94089	1.06948	0.687144	1.02734	1.27926	1.94905	1.07426
788	381.363	57.3243	43.47	34.189	26.74	21.86	0.688168	1.02727	1.27991	1.9537	1.07534	0.687074	1.02788	1.28074	1.95492	1.07508
789	382.177	57.3471	43.464	34.181	26.735	21.8829	0.688204	1.02924	1.28316	1.96912	1.07764	0.686892	1.02793	1.28159	1.9571	1.07529
790	382.54	57.33	43.46	34.174	26.731	21.85	0.68951	1.02988	1.2849	1.95933	1.07818	0.686486	1.02753	1.28188	1.95724	1.075
791	383.078	57.385	43.455	34.167	26.726	21.8483	0.687506	1.03111	1.28705	1.96343	1.07798	0.686852	1.02725	1.28235	1.96118	1.07552
792	381.684	57.39	43.463	34.172	26.734	21.8886	0.685152	1.02703	1.28289	1.9693	1.07512	0.686616	1.02747	1.28351	1.96063	1.0756
793	380.469	57.3586	43.462	34.168	26.732	21.8414	0.684465	1.02343	1.27914	1.94491	1.07123	0.685683	1.02618	1.28276	1.95964	1.07447
794	380.39	57.3457	43.462	34.164	26.731	21.9	0.684957	1.02277	1.2794	1.96848	1.07316	0.685232	1.0255	1.28269	1.96076	1.07408
795	382.754	57.3943	43.456	34.155	26.726	21.8186	0.686516	1.0288	1.28804	1.94987	1.07589	0.684481	1.02371	1.28127	1.96003	1.07282
796	379.64	57.38	43.457	34.154	26.727	21.89	0.681678	1.02021	1.2779	1.96217	1.06971	0.684062	1.02285	1.28099	1.95657	1.07202
797	381.529	57.35	43.453	34.149	26.723	21.8743	0.686351	1.02517	1.28443	1.96716	1.07546	0.684067	1.02236	1.28122	1.96052	1.07222
798	379.191	57.3429	43.448	34.141	26.718	21.8771	0.682251	1.01857	1.27708	1.95829	1.06918	0.683109	1.02147	1.28088	1.95933	1.07124
799	380.224	57.3814	43.448	34.138	26.717	21.83	0.682216	1.02101	1.28091	1.94508	1.0695	0.682594	1.02056	1.28051	1.96277	1.07087
800	379.97	57.3267	43.449	34.136	26.719	21.9033	0.684499	1.02	1.28074	1.97257	1.07265	0.68329	1.02098	1.28186	1.96329	1.07169
801	378.763	57.41	43.449	34.134	26.719	21.8883	0.678253	1.01654	1.27702	1.9602	1.06629	0.682889	1.02021	1.28177	1.95902	1.07089
802	381.12	57.4	43.448	34.129	26.717	21.89	0.682913	1.02243	1.28548	1.9739	1.07328	0.68291	1.02037	1.2828	1.96068	1.07125
803	381.521	57.3357	43.443	34.121	26.712	21.86	0.686549	1.02317	1.28736	1.96579	1.07544	0.682939	1.02016	1.2834	1.96455	1.0716
804	380.356	57.3571	43.446	34.121	26.714	21.8057	0.683545	1.01972	1.28377	1.93731	1.06987	0.682634	1.01989	1.28388	1.96347	1.07134
805	380.424	57.3771	43.44	34.113	26.708	21.88	0.682393	1.01969	1.28435	1.96989	1.0717	0.682712	1.01933	1.28405	1.96342	1.07126
806	380.491	57.38	43.441	34.111	26.709	21.8857	0.682422	1.01954	1.2851	1.97216	1.07198	0.682871	1.01841	1.28371	1.96333	1.07104
807	380.09	57.3586	43.433	34.1	26.7	21.8643	0.68236	1.01813	1.28409	1.96501	1.07085	0.681856	1.01737	1.28319	1.95991	1.06979
808	378.196	57.3629	43.434	34.097	26.7	21.8757	0.678799	1.01263	1.27821	1.95985	1.06573	0.681477	1.01646	1.28285	1.96509	1.06963
809	379.5	57.3	43.43	34.092	26.698	21.89	0.68403	1.01601	1.28313	1.97327	1.07173	0.680945	1.01553	1.28251	1.96276	1.06881
810	379.569	57.3971	43.431	34.09	26.698	21.8114	0.679444	1.01587	1.28371	1.9419	1.06663	0.680884	1.01564	1.28351	1.96096	1.06884
811	378.713	57.33	43.425	34.082	26.693	21.8957	0.680893	1.01336	1.28134	1.97358	1.06878	0.680032	1.01485	1.28333	1.96285	1.0682
812	378.759	57.3843	43.432	34.086	26.7	21.8529	0.678668	1.01316	1.28202	1.95351	1.06598	0.680136	1.01504	1.28443	1.96213	1.06846
813	381.567	57.4171	43.43	34.081	26.698	21.83	0.681996	1.02034	1.29205	1.95957	1.07221	0.679318	1.01489	1.28508	1.96217	1.06803
814	378.747	57.4257	43.427	34.076	26.695	21.9086	0.676396	1.01258	1.28284	1.97823	1.06638	0.67908	1.01387	1.28465	1.96242	1.06754
815	379.39	57.38	43.422	34.068	26.692	21.84	0.679521	1.01398	1.28589	1.95481	1.0675	0.678404	1.01321	1.28469	1.95883	1.06668
816	379.866	57.4214	43.421	34.064	26.689	21.8771	0.678311	1.01492	1.28768	1.97359	1.06871	0.678348	1.01262	1.28481	1.95901	1.06652
817	377.663	57.3533	43.423	34.063	26.691	21.8333	0.677772	1.00872	1.28074	1.94365	1.06324	0.676886	1.01006	1.28242	1.95485	1.06419
818	377.76	57.39	43.423	34.061	26.692	21.845	0.676165	1.00876	1.28159	1.94842	1.06277	0.677288	1.00984	1.28308	1.95171	1.06426
819	377.98	57.3467	43.415	34.05	26.684	21.85	0.678275	1.00902	1.28285	1.9548	1.06483	0.676569	1.00921	1.28313	1.94853	1.06341
820	375.62	57.3929	43.414	34.046	26.683	21.8186	0.671765	1.0024	1.27536	1.93044	1.05588	0.676577	1.00803	1.28245	1.94791	1.06292
821	379.033	57.3643	43.413	34.041	26.681	21.8371	0.679208	1.01108	1.28748	1.95626	1.06688	0.676289	1.00772	1.28286	1.95082	1.06295
822	378.55	57.44	43.409	34.035	26.677	21.78	0.674489	1.00957	1.28619	1.93256	1.06155	0.676285	1.00739	1.28326	1.95017	1.06287
823	377.55	57.32	43.406	34.03	26.673	21.88	0.678364	1.00669	1.28296	1.96928	1.06532	0.676589	1.0072	1.28379	1.94813	1.06294
824	377.639	57.3729	43.402	34.022	26.667	21.86	0.675761	1.0065	1.28361	1.964	1.06339	0.677678	1.00834	1.28601	1.95261	1.06465
825	377.709	57.3688	43.403	34.021	26.669	21.8112	0.676134	1.00647	1.28437	1.94385	1.06225	0.677214	1.00768	1.28588	1.95193	1.0641
826	378.25	57.3	43.402	34.018	26.668	21.795	0.680404	1.0077	1.28656	1.94054	1.06534	0.678064	1.00774	1.28675	1.95622	1.06511
827	379.376	57.3612	43.401	34.014	26.667	21.8325	0.679387	1.01038	1.29092	1.96182	1.0678	0.678435	1.00841	1.28845	1.95566	1.06578
828	377.981	57.3814	43.402	34.013	26.668	21.8257	0.67596	1.00645	1.28653	1.95146	1.06307	0.678297	1.00822	1.28901	1.95657	1.0658
829	379.471	57.3471	43.405	34.012	26.671	21.8371	0.68044	1.00998	1.2923	1.96257	1.06863	0.678173	1.0079	1.2894	1.95909	1.06589
830	380.11	57.355	43.4	34.004	26.665	21.83	0.680957	1.01136	1.29483	1.96541	1.06998	0.677707	1.00723	1.2894	1.96077	1.06554
831	377.866	57.3963	43.397	33.999	26.662	21.8675	0.674797	1.00518	1.28754	1.97031	1.06355	0.677156	1.00647	1.28929	1.96219	1.06508
832	377.638	57.375	43.394	33.993	26.658	21.845	0.675269	1.00425	1.28711	1.96155	1.06287	0.676949	1.00672	1.29048	1.96295	1.06528
833	377.33	57.33	43.399	33.994	26.662	21.83	0.677141	1.003	1.28659	1.95225	1.0629	0.677768	1.00743	1.29219	1.96413	1.06636
834	378.227	57.3925	43.395	33.987	26.658	21.8625	0.675527	1.00507	1.29017	1.97178	1.06453	0.677533	1.0067	1.2921	1.96589	1.06612
835	379.535	57.46	43.393	33.982	26.654	21.805	0.674513	1.00822	1.29481	1.95677	1.06447	0.67757	1.0065	1.29266	1.96241	1.06593
836	382.149	57.3162	43.393	33.98	26.655	21.8075	0.68617	1.01495	1.30426	1.97085	1.07621	0.678008	1.00738	1.29468	1.96682	1.06711
837	378.997	57.3429	43.395	33.979	26.658	21.8671	0.679311	1.00626	1.29421	1.97771	1.06833	0.677672	1.00749	1.29571	1.96749	1.06716
838	378.14	57.395	43.391	33.973	26.653	21.795	0.675057	1.00377	1.29146	1.94597	1.06219	0.677597	1.0073	1.29632	1.9669	1.06712
839	380.79	57.42	43.386	33.964	26.648	21.87	0.678335	1.01037	1.30122	1.99241	1.07114	0.677367	1.00602	1.29554	1.97078	1.06677
840	378.469	57.4057	43.384	33.958	26.645	21.81	0.67479	1.00379	1.29382	1.95692	1.06324	0.676101	1.00424	1.2941	1.96885	1.0651
841	378.54	57.41	43.39	33.962	26.651	21.8414	0.675	1.00377	1.29442	1.96764	1.06425	0.676777	1.00499	1.29589	1.96734	1.06592
842	376.901	57.3957	43.393	33.963	26.655	21.9057	0.672908	0.999208	1.28935	1.98399	1.06199	0.676957	1.0043	1.29592	1.96915	1.06598
843	378.281	57.3557	43.393	33.96	26.653	21.8214	0.677306	1.00255	1.29424	1.95734	1.06455	0.676699	1.00246	1.29439	1.96371	1.06464
844	381.761	57.3414	43.389	33.953	26.649	21.7971	0.684041	1.01145	1.30669	1.96709	1.07404	0.67653	1.00161	1.29403	1.96669	1.06445
845	377.18	57.3314	43.389	33.95	26.65	21.8357	0.676317	0.998994	1.29171	1.95865	1.06261	0.676965	1.00203	1.2954	1.96957	1.06528
846	376.72	57.31	43.389	33.947	26.649	21.83	0.676532	0.997458	1.29049	1.95435	1.06178	0.677061	1.00187	1.29599	1.96971	1.06541
847	376.904	57.3762	43.388	33.945	26.648	21.8838	0.673608	0.997839	1.2913	1.97777	1.06193	0.675773	1.00048	1.29507	1.97247	1.06426
848	380.465	57.41	43.382	33.934	26.64	21.855	0.678046	1.00673	1.30403	1.9878	1.07007	0.67439	0.998941	1.29388	1.97613	1.06303
849	377.233	57.3811	43.38	33.931	26.64	21.8889	0.673577	0.998077	1.29349	1.98497	1.06286	0.674574	0.999172	1.29498	1.97945	1.06364
850	375.406	57.4225	43.379	33.926	26.638	21.89	0.668292	0.992823	1.28775	1.97665	1.05652	0.674321	0.999654	1.29641	1.98355	1.06416
851	378.45	57.41	43.38	33.925	26.638	21.89	0.674359	1.00066	1.29837	1.99268	1.06546	0.674043	0.99931	1.29686	1.98156	1.06382
852	378.551	57.3425	43.376	33.918	26.635	21.86	0.677606	1.00061	1.29943	1.98194	1.06687	0.673255	0.997635	1.29551	1.97968	1.06249
853	378.755	57.41	43.377	33.916	26.635	21.86	0.674758	1.00083	1.30049	1.98301	1.06541	0.673786	0.99817	1.29708	1.97894	1.06319
854	376.83	57.405	43.379	33.915	26.637	21.84	0.671663	0.99543	1.29441	1.96388	1.05955	0.674647	0.998844	1.2988	1.98091	1.06434
855	376.79	57.3825	43.376	33.909	26.633	21.8625	0.672527	0.995009	1.29463	1.97458	1.06078	0.674341	0.997857	1.29841	1.97775	1.06358
856	379.491	57.3825	43.375	33.905	26.632	21.84	0.6773	1.00182	1.30445	1.97982	1.06771	0.674225	0.997556	1.29887	1.97849	1.06355
857	377.989	57.3857	43.372	33.899	26.629	21.8814	0.674319	0.997542	1.29982	1.99043	1.06463	0.674384	0.996808	1.29877	1.97427	1.06311
858	376.67	57.3775	43.369	33.893	26.625	21.8463	0.672217	0.993747	1.29565	1.97055	1.06011	0.674467	0.996216	1.29886	1.97659	1.06318
859	378.594	57.3529	43.368	33.889	26.623	21.86	0.676793	0.998508	1.30262	1.98716	1.06668	0.673925	0.995505	1.29881	1.97567	1.06257
860	377.609	57.3325	43.365	33.883	26.62	21.7875	0.67587	0.995594	1.29977	1.95349	1.06234	0.673455	0.994836	1.29877	1.97952	1.06235
861	376.096	57.3486	43.362	33.877	26.617	21.8686	0.672244	0.991291	1.2951	1.98011	1.06002	0.672852	0.993797	1.29822	1.97815	1.06149
862	375.697	57.4071	43.362	33.875	26.618	21.8457	0.668731	0.990031	1.29426	1.96812	1.05647	0.672662	0.993419	1.29858	1.97803	1.06131
863	378.474	57.3971	43.359	33.87	26.615	21.9	0.674011	0.99714	1.30418	2.00676	1.06621	0.671431	0.991968	1.29755	1.97699	1.05989
864	375.985	57.3812	43.354	33.862	26.609	21.8637	0.670097	0.990268	1.29596	1.98085	1.05859	0.67027	0.99115	1.29727	1.97949	1.05907
865	376.46	57.3875	43.359	33.863	26.613	21.835	0.670884	0.991102	1.29814	1.96976	1.05888	0.670314	0.991202	1.29815	1.97977	1.05928
866	375.533	57.4086	43.358	33.859	26.612	21.87	0.668181	0.988348	1.29548	1.97982	1.05669	0.670619	0.990883	1.29858	1.9785	1.05936
867	376.15	57.44	43.357	33.857	26.611	21.84	0.667738	0.989868	1.29778	1.97102	1.0566	0.67026	0.989577	1.29777	1.97633	1.05847
868	376.948	57.3637	43.352	33.849	26.607	21.8525	0.672556	0.991654	1.30125	1.98206	1.06149	0.67051	0.989535	1.29866	1.97395	1.05859
869	375.64	57.3513	43.353	33.846	26.607	21.8138	0.67087	0.987798	1.29728	1.95921	1.05702	0.670259	0.989195	1.29908	1.97386	1.0584
870	375.835	57.3425	43.35	33.84	26.604	21.8862	0.671494	0.987999	1.29849	1.9916	1.06	0.670829	0.989265	1.3	1.97517	1.05902
871	376.745	57.36	43.341	33.827	26.594	21.7987	0.671847	0.989975	1.30217	1.96416	1.05943	0.671038	0.988609	1.30007	1.97592	1.05903
872	376.385	57.4025	43.34	33.823	26.591	21.8125	0.669129	0.988718	1.30111	1.96916	1.05756	0.670725	0.987814	1.29991	1.97415	1.05845
873	376.511	57.3425	43.339	33.82	26.59	21.8575	0.672173	0.988841	1.30191	1.98897	1.06104	0.670799	0.987513	1.30034	1.97781	1.05874
874	375.311	57.36	43.339	33.816	26.589	21.8413	0.669195	0.985276	1.2983	1.97626	1.05666	0.670709	0.987508	1.30115	1.97993	1.05897
875	375.74	57.3475	43.335	33.809	26.584	21.815	0.670366	0.986091	1.30014	1.9697	1.05745	0.67136	0.987835	1.30234	1.98201	1.05982
876	375.667	57.3225	43.334	33.806	26.583	21.8513	0.671386	0.985693	1.30025	1.98482	1.05908	0.670703	0.986259	1.30102	1.98129	1.05868
877	376.65	57.37	43.334	33.803	26.583	21.89	0.670864	0.98796	1.30419	2.00645	1.06158	0.669832	0.984759	1.29991	1.97842	1.05732
878	378.41	57.33	43.344	33.81	26.591	21.81	0.676409	0.992265	1.31047	1.97872	1.06534	0.669407	0.983993	1.29972	1.97547	1.05659
879	372.889	57.3633	43.335	33.8	26.584	21.8378	0.664528	0.977685	1.29188	1.96414	1.04964	0.668798	0.983246	1.2995	1.97427	1.05588
880	373.335	57.3475	43.335	33.795	26.583	21.8425	0.666075	0.978341	1.29415	1.96886	1.0515	0.668135	0.982521	1.29939	1.97163	1.05505
881	374.053	57.3733	43.337	33.794	26.584	21.8022	0.666223	0.979915	1.29699	1.95562	1.05156	0.667924	0.982256	1.2999	1.96724	1.05461
882	374.455	57.385	43.331	33.787	26.578	21.805	0.6661	0.980865	1.29857	1.96132	1.05243	0.666562	0.980965	1.29907	1.96677	1.05322
883	374.518	57.3737	43.331	33.783	26.578	21.8163	0.666745	0.980618	1.29951	1.96628	1.05327	0.667455	0.982222	1.30172	1.97328	1.05504
884	376.73	57.4	43.33	33.779	26.577	21.81	0.669385	0.986101	1.30773	1.97572	1.05853	0.667961	0.983316	1.304	1.97911	1.05646
885	375.752	57.4122	43.326	33.772	26.572	21.8167	0.666879	0.983233	1.3047	1.97543	1.05562	0.668034	0.983723	1.30537	1.98519	1.05728
886	377.19	57.385	43.327	33.768	26.572	21.88	0.670775	0.986479	1.31042	2.00975	1.06236	0.667847	0.98298	1.3053	1.98928	1.05722
887	377.048	57.4	43.323	33.763	26.568	21.8775	0.669616	0.986003	1.3101	2.00963	1.06143	0.667201	0.982223	1.30516	1.99184	1.05676
888	375.928	57.4187	43.323	33.76	26.567	21.8637	0.666739	0.982766	1.30657	1.99823	1.05731	0.667292	0.981658	1.30525	1.99654	1.057
889	373.327	57.3633	43.324	33.758	26.568	21.8778	0.664787	0.97566	1.29808	1.98992	1.05205	0.666824	0.980605	1.30468	2.00214	1.0567
890	373.353	57.4167	43.322	33.752	26.564	21.86	0.662224	0.975322	1.29853	1.98423	1.05002	0.665352	0.978327	1.3024	1.99592	1.05431
891	376.083	57.3525	43.32	33.747	26.561	21.88	0.67002	0.982144	1.30839	2.00856	1.06021	0.664669	0.977021	1.30149	1.99172	1.05305
892	373.755	57.3975	43.317	33.742	26.558	21.92	0.663604	0.975862	1.30065	2.01463	1.0535	0.664652	0.976454	1.30159	1.99336	1.05301
893	371.83	57.3933	43.319	33.741	26.56	21.8322	0.660475	0.970531	1.29449	1.9662	1.04561	0.664355	0.976385	1.30235	1.99349	1.05293
894	374.333	57.3963	43.32	33.74	26.562	21.8363	0.66483	0.976859	1.30375	1.98028	1.05268	0.66475	0.975776	1.30236	1.99459	1.05308
895	375.234	57.3912	43.319	33.735	26.559	21.8912	0.66662	0.978803	1.30725	2.00971	1.057	0.663899	0.974993	1.30215	1.9921	1.05211
896	373.959	57.4222	43.315	33.728	26.555	21.8589	0.662708	0.975172	1.30336	1.99079	1.05153	0.663597	0.974403	1.30221	1.98625	1.05136
897	372.5	57.32	43.316	33.726	26.555	21.88	0.664989	0.971064	1.29863	1.99198	1.05107	0.664177	0.975308	1.30422	1.98911	1.05251
898	374.765	57.4238	43.315	33.722	26.553	21.8475	0.664065	0.976663	1.30689	1.9911	1.05341	0.66393	0.974408	1.30385	1.98783	1.05194
899	372.95	57.41	43.315	33.72	26.554	21.83	0.661493	0.97173	1.30111	1.9737	1.0482	0.663166	0.973561	1.30355	1.98224	1.05078
900	375.037	57.42	43.311	33.713	26.548	21.8275	0.664536	0.976864	1.30857	1.98622	1.0537	0.663549	0.973594	1.30437	1.98206	1.05115
901	372.696	57.3633	43.312	33.712	26.551	21.8244	0.663096	0.970561	1.30113	1.97129	1.0487	0.663192	0.973454	1.30499	1.98262	1.05102
902	373.7	57.44	43.312	33.709	26.551	21.81	0.661275	0.972873	1.30518	1.97058	1.04884	0.662798	0.97249	1.30449	1.9794	1.05019
903	374.75	57.3911	43.311	33.706	26.549	21.84	0.665389	0.975403	1.30903	1.98954	1.05412	0.662975	0.972132	1.30481	1.9795	1.05025
904	372.861	57.3775	43.307	33.698	26.544	21.8738	0.662488	0.970083	1.30298	1.99594	1.0502	0.662394	0.970335	1.30323	1.97806	1.04901
905	372.875	57.4091	43.313	33.702	26.55	21.8145	0.66131	0.969918	1.3034	1.96853	1.04756	0.661939	0.970319	1.30404	1.98255	1.04916
906	372.763	57.3767	43.315	33.7	26.55	21.83	0.66273	0.969223	1.30337	1.97438	1.04866	0.661368	0.969126	1.30326	1.98401	1.04843
907	370.94	57.3538	43.313	33.696	26.549	21.8563	0.66047	0.964282	1.29754	1.97613	1.04497	0.661084	0.968449	1.30325	1.98515	1.04813
908	373.43	57.455	43.308	33.688	26.544	21.8825	0.65991	0.970452	1.3068	2.00274	1.04977	0.659903	0.967262	1.3025	1.98265	1.04674
909	371.302	57.4288	43.306	33.682	26.54	21.8537	0.657277	0.964522	1.29971	1.98081	1.04372	0.659167	0.965749	1.30135	1.9829	1.04567
910	373.783	57.3889	43.303	33.676	26.537	21.8589	0.6634	0.970664	1.30895	1.99751	1.05202	0.658837	0.965511	1.30189	1.98298	1.04549
911	370.474	57.4611	43.304	33.674	26.537	21.8556	0.65422	0.961772	1.29772	1.97842	1.0405	0.658619	0.965317	1.30249	1.98629	1.04562
912	369.688	57.3913	43.306	33.672	26.537	21.8462	0.656161	0.95933	1.29533	1.9703	1.04005	0.658302	0.964336	1.30198	1.98536	1.04499
913	372.974	57.4237	43.305	33.668	26.535	21.8138	0.660423	0.967557	1.30721	1.97497	1.04738	0.657918	0.96352	1.30167	1.98599	1.0445
914	371.303	57.3911	43.304	33.664	26.533	21.89	0.658942	0.962924	1.30172	1.99926	1.04589	0.657071	0.962363	1.30091	1.98516	1.04344
915	371.672	57.4289	43.301	33.658	26.528	21.8733	0.657692	0.96358	1.3032	1.99623	1.04533	0.657294	0.961881	1.30108	1.98301	1.04332
916	369.91	57.4256	43.298	33.653	26.526	21.8678	0.65459	0.958813	1.29757	1.98525	1.04031	0.657937	0.962123	1.30221	1.98136	1.04386
917	371.472	57.4311	43.306	33.658	26.534	21.8711	0.657468	0.962563	1.30359	1.99164	1.04464	0.657588	0.960865	1.30137	1.97925	1.04299
918	369.98	57.4125	43.308	33.657	26.536	21.825	0.655784	0.958398	1.2989	1.96338	1.03963	0.658986	0.962184	1.30404	1.97878	1.04465
919	371.073	57.3487	43.307	33.654	26.536	21.8	0.660659	0.961029	1.30329	1.95879	1.04384	0.659509	0.962045	1.30474	1.97735	1.04495
920	370.347	57.3733	43.302	33.645	26.53	21.8067	0.657981	0.958752	1.30129	1.9602	1.04127	0.660317	0.962367	1.30606	1.97914	1.04589
921	375.64	57.35	43.307	33.647	26.535	21.83	0.668732	0.972153	1.32044	1.99596	1.05755	0.660553	0.962395	1.30699	1.9798	1.04624
922	372.028	57.3622	43.299	33.637	26.527	21.8444	0.661349	0.962606	1.30811	1.98624	1.04744	0.659824	0.961255	1.30629	1.9823	1.04551
923	371.549	57.3656	43.297	33.632	26.524	21.8744	0.660247	0.961068	1.3068	1.99777	1.04688	0.660082	0.961735	1.30777	1.98781	1.04644
924	372.319	57.4187	43.297	33.629	26.524	21.8613	0.659123	0.962761	1.31006	1.99624	1.04709	0.660002	0.961707	1.30855	1.99137	1.04675
925	367.66	57.42	43.294	33.623	26.52	21.88	0.65068	0.950419	1.29403	1.98093	1.0345	0.658348	0.959621	1.30647	1.98966	1.04464
926	373.18	57.37	43.287	33.613	26.511	21.84	0.662465	0.964389	1.31364	1.99732	1.05032	0.656916	0.958192	1.30532	1.99098	1.04322
927	371.074	57.4	43.289	33.611	26.512	21.8389	0.657421	0.958551	1.30678	1.98516	1.04348	0.656322	0.95726	1.30483	1.9881	1.0423
928	370.765	57.395	43.29	33.61	26.512	21.84	0.657152	0.957554	1.30588	1.98397	1.04279	0.656308	0.957037	1.30529	1.98693	1.04221
929	368.961	57.455	43.293	33.61	26.515	21.8925	0.651323	0.952601	1.30007	1.99546	1.0375	0.657082	0.957707	1.307	1.98796	1.04324
930	369.792	57.3867	43.296	33.611	26.518	21.8433	0.656094	0.954549	1.30337	1.97764	1.0404	0.655838	0.955954	1.30548	1.98552	1.04153
931	372.483	57.4222	43.292	33.604	26.513	21.8289	0.659019	0.961198	1.31323	1.98802	1.0465	0.655425	0.955389	1.30552	1.98485	1.04106
932	370.276	57.405	43.296	33.604	26.516	21.86	0.656099	0.955108	1.306	1.98817	1.04171	0.655353	0.955438	1.30645	1.98723	1.04134
933	369.231	57.4156	43.296	33.601	26.517	21.8556	0.653758	0.952117	1.30305	1.98024	1.03833	0.6561	0.956264	1.30841	1.98845	1.04246
934	370.268	57.4356	43.293	33.596	26.514	21.84	0.654528	0.954594	1.30707	1.98047	1.04021	0.655684	0.955977	1.30885	1.98848	1.04218
935	371.664	57.44	43.29	33.59	26.51	21.8656	0.656651	0.957898	1.31237	2.00059	1.04475	0.65482	0.953937	1.30694	1.98521	1.0405
936	371.967	57.4538	43.29	33.587	26.509	21.8688	0.656548	0.958383	1.31382	2.00403	1.04529	0.654351	0.952614	1.30598	1.98314	1.03952
937	369.777	57.4378	43.285	33.58	26.504	21.83	0.653187	0.952542	1.30645	1.97784	1.03847	0.654227	0.951881	1.3058	1.98483	1.03931
938	367.744	57.3637	43.284	33.575	26.502	21.8237	0.652966	0.946915	1.29982	1.96518	1.03473	0.654458	0.951624	1.30629	1.98351	1.03936
939	367.443	57.3544	43.283	33.571	26.501	21.8467	0.652817	0.945849	1.2993	1.97366	1.03482	0.653803	0.950089	1.30506	1.983	1.03826
940	368.038	57.3767	43.284	33.568	26.5	21.8811	0.652889	0.946989	1.30177	1.99203	1.03686	0.653237	0.948236	1.3034	1.97936	1.03684
941	370.408	57.4	43.287	33.568	26.502	21.8044	0.656146	0.952793	1.31053	1.97128	1.0406	0.65372	0.948161	1.30419	1.98028	1.03731
942	368.33	57.4067	43.285	33.563	26.5	21.8889	0.652065	0.947156	1.30373	1.99697	1.03703	0.653774	0.948328	1.30523	1.98236	1.0377
943	367.802	57.3711	43.281	33.555	26.494	21.8467	0.652589	0.94541	1.30223	1.97857	1.03535	0.654131	0.948902	1.30684	1.98428	1.03848
944	370.488	57.39	43.283	33.554	26.494	21.8262	0.656567	0.952018	1.31192	1.98429	1.04176	0.654398	0.948975	1.30779	1.98293	1.03873
945	369.03	57.3989	43.278	33.547	26.489	21.8289	0.653341	0.948078	1.30713	1.97973	1.03748	0.65379	0.947816	1.30703	1.98598	1.03809
946	369.84	57.3811	43.272	33.538	26.483	21.83	0.655321	0.949866	1.31056	1.98711	1.04031	0.65345	0.947225	1.30702	1.98388	1.03755
947	369.072	57.368	43.276	33.538	26.486	21.832	0.654754	0.947505	1.30839	1.98255	1.03859	0.654251	0.947972	1.3088	1.98372	1.03855
948	368.085	57.385	43.269	33.528	26.478	21.86	0.651893	0.94468	1.30527	1.99266	1.03613	0.653604	0.946904	1.30812	1.98112	1.03754
949	367.514	57.412	43.27	33.527	26.479	21.844	0.649685	0.943021	1.30361	1.98228	1.03327	0.653345	0.946638	1.30854	1.98407	1.03756
950	370.595	57.3482	43.272	33.526	26.479	21.7936	0.658194	0.950632	1.31472	1.97741	1.04233	0.653632	0.946755	1.30951	1.98386	1.03791
951	368.297	57.399	43.278	33.53	26.486	21.803	0.652038	0.944545	1.30713	1.96614	1.03466	0.653449	0.946219	1.30951	1.98599	1.03778
952	369.025	57.434	43.274	33.524	26.482	21.87	0.651527	0.946218	1.31009	2.00035	1.03764	0.653905	0.946279	1.31037	1.98354	1.03805
953	370.92	57.38	43.273	33.519	26.48	21.81	0.657333	0.950687	1.31737	1.98565	1.04279	0.654297	0.946344	1.31121	1.98485	1.03854
954	368.29	57.3667	43.277	33.521	26.484	21.8744	0.653475	0.943753	1.30841	1.99743	1.03766	0.65297	0.945095	1.31025	1.98634	1.03728
955	368.929	57.3544	43.275	33.516	26.482	21.8133	0.655084	0.945099	1.31123	1.97556	1.03803	0.652584	0.944316	1.31001	1.99024	1.03703
956	368.333	57.38	43.266	33.506	26.474	21.85	0.652425	0.943477	1.30949	1.99142	1.03668	0.653354	0.94468	1.31142	1.98965	1.03781
957	367.825	57.44	43.269	33.506	26.476	21.85	0.648904	0.941885	1.30805	1.98781	1.03351	0.652669	0.943179	1.31018	1.99095	1.03682
958	366.922	57.3978	43.271	33.503	26.476	21.8744	0.649338	0.939093	1.3054	1.99347	1.0329	0.65293	0.94289	1.31065	1.98681	1.03668
959	370.815	57.38	43.268	33.497	26.474	21.83	0.656914	0.948764	1.32	1.9962	1.04308	0.652625	0.942593	1.31109	1.98823	1.03657
960	367.536	57.3489	43.268	33.495	26.474	21.8678	0.652543	0.940181	1.3087	1.99478	1.03586	0.651974	0.941399	1.31035	1.98668	1.03558
961	368.254	57.3211	43.272	33.496	26.477	21.8	0.655298	0.941731	1.31163	1.96843	1.03672	0.65208	0.940887	1.31055	1.98594	1.03547
962	368.91	57.3867	43.262	33.482	26.465	21.82	0.652953	0.943021	1.31434	1.98552	1.03724	0.652486	0.94082	1.31129	1.98372	1.03567
963	365.931	57.3867	43.266	33.483	26.469	21.85	0.647864	0.93512	1.30429	1.98058	1.02973	0.650658	0.938724	1.30913	1.98339	1.03352
964	367.287	57.4	43.266	33.48	26.468	21.8367	0.649651	0.938296	1.30949	1.98262	1.03277	0.651263	0.939373	1.3108	1.98388	1.03439
965	367.49	57.35	43.263	33.475	26.465	21.82	0.652179	0.938624	1.31059	1.97788	1.03431	0.650437	0.938467	1.31036	1.98725	1.03376
966	365.828	57.4578	43.259	33.468	26.459	21.8722	0.644118	0.934092	1.30485	1.99393	1.02802	0.650322	0.937665	1.31004	1.98351	1.03314
967	370.143	57.3444	43.255	33.46	26.452	21.8211	0.656774	0.944725	1.32043	1.99823	1.04197	0.650265	0.937417	1.31043	1.98449	1.03315
968	366.599	57.3744	43.264	33.466	26.462	21.8611	0.649517	0.935392	1.30853	1.992	1.03229	0.650548	0.93724	1.31095	1.98514	1.0334
969	367.5	57.35	43.262	33.461	26.459	21.77	0.652151	0.937404	1.31213	1.95937	1.03288	0.650325	0.936906	1.31131	1.98831	1.03343
970	366	57.39	43.258	33.455	26.454	21.85	0.647467	0.933388	1.30696	1.9874	1.02983	0.651026	0.937169	1.3125	1.98648	1.03402
971	367.588	57.3567	43.254	33.447	26.449	21.8244	0.651628	0.937055	1.31319	1.98715	1.03452	0.649606	0.935636	1.31122	1.98559	1.03239
972	367.398	57.3722	43.255	33.445	26.45	21.8578	0.65062	0.936284	1.31307	2.00011	1.0345	0.649084	0.935643	1.31201	1.98925	1.03243
973	367.335	57.4025	43.253	33.441	26.448	21.8125	0.649025	0.935933	1.31322	1.9811	1.03213	0.648607	0.935373	1.31246	1.99314	1.03238
974	366.726	57.4278	43.254	33.438	26.447	21.8444	0.646838	0.933999	1.31142	1.99197	1.03061	0.649181	0.935624	1.31367	1.99284	1.03299
975	367.366	57.47	43.25	33.432	26.443	21.8911	0.645861	0.935439	1.31408	2.01765	1.03254	0.648339	0.934508	1.31293	1.99203	1.03195
976	367.544	57.4122	43.25	33.428	26.442	21.8167	0.648811	0.935513	1.31529	1.98658	1.03256	0.648264	0.934109	1.31318	1.99011	1.03169
977	367.473	57.3533	43.252	33.428	26.444	21.8167	0.651487	0.935142	1.31541	1.98534	1.03407	0.647992	0.933554	1.31316	1.98908	1.03127
978	365.304	57.396	43.253	33.425	26.443	21.834	0.645733	0.929243	1.30802	1.98147	1.02723	0.64769	0.933224	1.31348	1.99079	1.03114
979	367.05	57.3733	43.258	33.428	26.449	21.83	0.650091	0.933494	1.31484	1.98663	1.03268	0.648084	0.933098	1.31414	1.98741	1.03123
980	366.554	57.4089	43.248	33.416	26.437	21.7944	0.647125	0.932044	1.31306	1.97388	1.02923	0.647538	0.931601	1.31283	1.98642	1.03016
981	366.565	57.462	43.248	33.412	26.436	21.863	0.644725	0.931692	1.31366	2.00396	1.02971	0.647607	0.931512	1.31356	1.98809	1.0304
982	367.804	57.4256	43.249	33.41	26.437	21.8256	0.648614	0.934557	1.31867	1.99398	1.03316	0.647534	0.931362	1.31413	1.98657	1.0303
983	364.203	57.3667	43.25	33.407	26.436	21.8367	0.644988	0.925031	1.30614	1.97965	1.02506	0.646668	0.930335	1.31346	1.98555	1.02926
984	368.052	57.36	43.247	33.401	26.433	21.8256	0.651974	0.934522	1.32051	1.99705	1.03576	0.646412	0.930065	1.31391	1.98922	1.02933
985	365.632	57.412	43.245	33.397	26.43	21.792	0.645218	0.928188	1.31201	1.97085	1.02648	0.646841	0.930163	1.31486	1.98792	1.0297
986	365.002	57.4167	43.248	33.397	26.432	21.8222	0.644031	0.926308	1.31013	1.9795	1.02545	0.646429	0.929109	1.31417	1.98912	1.02909
987	366.593	57.4467	43.245	33.392	26.429	21.8456	0.645335	0.930157	1.31622	1.99955	1.02972	0.646408	0.92933	1.31525	1.9888	1.02928
988	367.581	57.4333	43.246	33.39	26.43	21.8233	0.647728	0.932379	1.32033	1.99483	1.03224	0.645469	0.927821	1.31387	1.98845	1.02799
989	365.678	57.4056	43.248	33.388	26.43	21.8644	0.645729	0.927175	1.31388	2.00237	1.02889	0.645069	0.927175	1.31375	1.99167	1.02774
990	365.518	57.4189	43.248	33.386	26.43	21.8089	0.644839	0.926581	1.31368	1.97743	1.02645	0.645392	0.926892	1.31411	1.99295	1.028
991	364.632	57.3722	43.248	33.382	26.428	21.8578	0.645402	0.923962	1.31087	1.99461	1.02672	0.64546	0.926334	1.31411	1.99091	1.02773
992	364.551	57.4367	43.25	33.383	26.432	21.86	0.642419	0.923662	1.31115	1.99339	1.02469	0.644693	0.924668	1.31253	1.99122	1.02651
993	364.924	57.362	43.246	33.376	26.426	21.838	0.646295	0.924326	1.31268	1.98847	1.02726	0.644645	0.924131	1.31258	1.99049	1.02627
994	365.796	57.4044	43.244	33.371	26.423	21.8167	0.645805	0.926252	1.31619	1.98529	1.02787	0.644688	0.923893	1.31302	1.99474	1.02658
995	363.721	57.3967	43.241	33.365	26.42	21.8667	0.64236	0.92072	1.30929	1.997	1.0237	0.643545	0.922888	1.31238	1.9928	1.02531
996	364.934	57.38	43.244	33.364	26.422	21.854	0.645398	0.923416	1.31423	1.99723	1.02723	0.643539	0.922519	1.31269	1.98934	1.02501
997	365.636	57.407	43.238	33.355	26.413	21.859	0.645134	0.924911	1.31675	2.00722	1.02857	0.643197	0.922059	1.31284	1.98784	1.02458
998	362.591	57.4533	43.232	33.346	26.407	21.8311	0.637407	0.916931	1.30635	1.98099	1.01788	0.643451	0.922134	1.3138	1.99148	1.02515
999	364.379	57.424	43.243	33.353	26.417	21.791	0.642372	0.921079	1.31336	1.96919	1.02259	0.643477	0.921866	1.31424	1.98843	1.02495
1000	364.424	57.39	43.241	33.35	26.415	21.8089	0.643905	0.921101	1.31371	1.97794	1.02421	0.642953	0.921428	1.31435	1.9886	1.02451
1001	366.82	57.4022	43.241	33.346	26.414	21.8533	0.647578	0.926781	1.32292	2.01078	1.03187	0.642252	0.920106	1.31329	1.98878	1.0235
1002	363.788	57.3911	43.237	33.339	26.409	21.8056	0.642548	0.918842	1.31237	1.97563	1.02229	0.642872	0.920081	1.31406	1.98588	1.02381
1003	364.46	57.4433	43.245	33.345	26.416	21.8567	0.64173	0.920354	1.31498	1.99843	1.02415	0.643253	0.920393	1.31527	1.9885	1.02451
1004	362.747	57.4089	43.244	33.34	26.414	21.8989	0.640222	0.915657	1.30937	2.00851	1.02153	0.643314	0.920156	1.3158	1.98929	1.02461
1005	363.291	57.3933	43.241	33.334	26.41	21.7778	0.641751	0.916754	1.31171	1.96067	1.02003	0.642289	0.91888	1.31477	1.98768	1.0233
1006	365.944	57.42	43.237	33.328	26.407	21.804	0.64504	0.923262	1.32186	1.98753	1.02747	0.642292	0.91866	1.31531	1.98558	1.02317
1007	364.542	57.3822	43.238	33.326	26.408	21.8133	0.644331	0.919447	1.31737	1.98351	1.02489	0.642322	0.917789	1.31497	1.9818	1.02262
1008	363.98	57.44	43.231	33.317	26.401	21.85	0.640404	0.917843	1.31572	1.99945	1.0227	0.642367	0.917954	1.31597	1.97708	1.02254
1009	363.95	57.396	43.236	33.317	26.404	21.764	0.642567	0.917305	1.31618	1.96094	1.02141	0.642103	0.917901	1.31672	1.98432	1.02295
1010	362.85	57.365	43.234	33.312	26.401	21.801	0.64194	0.914256	1.31258	1.97201	1.02027	0.641961	0.91739	1.31682	1.98369	1.02267
1011	363.901	57.44	43.237	33.314	26.403	21.7978	0.640536	0.916812	1.31638	1.97548	1.02098	0.641518	0.916676	1.3166	1.98353	1.02212
1012	363.839	57.4456	43.231	33.305	26.398	21.8756	0.639905	0.916378	1.31692	2.0113	1.02288	0.641498	0.916189	1.31675	1.98182	1.02187
1013	365.301	57.41	43.23	33.3	26.395	21.79	0.644043	0.919691	1.3226	1.98318	1.02555	0.641117	0.915335	1.31628	1.98427	1.02146
1014	363.329	57.4033	43.238	33.305	26.402	21.82	0.641229	0.914449	1.31584	1.98237	1.02106	0.640855	0.915299	1.31694	1.98681	1.02155
1015	363.468	57.423	43.231	33.294	26.393	21.821	0.640269	0.914431	1.31672	1.98747	1.02092	0.640737	0.914897	1.31721	1.98831	1.02149
1016	362.308	57.392	43.237	33.298	26.399	21.82	0.639894	0.911329	1.3129	1.9781	1.01852	0.640956	0.914752	1.31778	1.98429	1.0214
1017	363.443	57.4267	43.232	33.291	26.393	21.8267	0.640105	0.914001	1.31721	1.9898	1.02091	0.640234	0.913749	1.31711	1.98582	1.02063
1018	363.588	57.444	43.235	33.29	26.395	21.818	0.639714	0.913997	1.3183	1.98595	1.02057	0.639624	0.912858	1.31659	1.98955	1.02013
1019	364.242	57.4233	43.227	33.279	26.385	21.7933	0.641437	0.915365	1.32087	1.98317	1.02229	0.640209	0.913137	1.31775	1.98783	1.02065
1020	363.28	57.44	43.227	33.276	26.385	21.83	0.638992	0.912672	1.31795	1.99385	1.02016	0.639899	0.912975	1.31828	1.98948	1.02059
1021	361.577	57.4267	43.235	33.282	26.393	21.8925	0.636952	0.90821	1.31215	2.00854	1.01755	0.639474	0.912366	1.31816	1.9893	1.0201
1022	364.978	57.3933	43.233	33.276	26.389	21.77	0.644367	0.916386	1.32488	1.97542	1.02455	0.639245	0.911237	1.31731	1.98754	1.01936
1023	362.585	57.445	43.231	33.272	26.387	21.831	0.637725	0.910194	1.31658	1.9896	1.0181	0.639021	0.910538	1.31705	1.98871	1.01903
1024	362.475	57.445	43.222	33.261	26.377	21.82	0.637128	0.909735	1.31637	1.98856	1.01747	0.639356	0.910395	1.3176	1.98913	1.01931
1025	361.17	57.38	43.23	33.265	26.385	21.81	0.63811	0.906096	1.31239	1.97361	1.01538	0.639717	0.910698	1.3188	1.98506	1.01955
1026	362.988	57.416	43.234	33.267	26.387	21.83	0.639874	0.910475	1.319	1.99138	1.02003	0.638587	0.909106	1.31726	1.98565	1.01815
1027	363.61	57.4	43.226	33.255	26.378	21.8256	0.641333	0.911669	1.32183	1.99678	1.02211	0.638493	0.908261	1.31682	1.98596	1.01777
1028	363.15	57.421	43.224	33.251	26.376	21.791	0.639484	0.910333	1.32055	1.9801	1.01923	0.63873	0.907951	1.31717	1.98433	1.01777
1029	361.226	57.416	43.227	33.251	26.379	21.817	0.636454	0.905238	1.31412	1.97954	1.01471	0.638564	0.907692	1.31753	1.98764	1.01786
1030	360.988	57.39	43.224	33.244	26.373	21.842	0.637068	0.904279	1.31345	1.99177	1.01549	0.638277	0.907517	1.31806	1.98664	1.01763
1031	362.373	57.405	43.223	33.241	26.372	21.79	0.63879	0.907566	1.31887	1.97716	1.01747	0.637686	0.906604	1.31751	1.98621	1.01686
1032	361.172	57.398	43.222	33.237	26.37	21.848	0.636943	0.904286	1.31488	1.99675	1.01595	0.637478	0.90607	1.3175	1.98904	1.01674
1033	363.226	57.456	43.22	33.233	26.368	21.792	0.637865	0.909247	1.32275	1.98441	1.01847	0.637971	0.906471	1.31881	1.99297	1.01763
1034	361.749	57.415	43.222	33.232	26.37	21.834	0.637196	0.905278	1.31794	1.99377	1.01669	0.638203	0.906771	1.31997	1.99456	1.01815
1035	362.386	57.4233	43.224	33.231	26.37	21.84	0.638033	0.906599	1.32045	1.99992	1.01841	0.63878	0.906821	1.32082	1.99638	1.01878
1036	363.072	57.4067	43.222	33.226	26.367	21.8444	0.639903	0.908044	1.32334	2.00701	1.02095	0.638618	0.906274	1.32079	1.99266	1.01826
1037	362.479	57.4133	43.225	33.227	26.37	21.8456	0.638692	0.906378	1.32157	2.00289	1.01912	0.638267	0.904902	1.31956	1.99168	1.01736
1038	363.203	57.3522	43.227	33.226	26.372	21.8089	0.642828	0.907918	1.32479	1.98989	1.02186	0.638306	0.904739	1.32006	1.98931	1.01725
1039	360.325	57.39	43.222	33.218	26.366	21.795	0.635808	0.900452	1.31467	1.97071	1.01229	0.638165	0.903711	1.31933	1.98407	1.01638
1040	360.075	57.39	43.223	33.217	26.367	21.815	0.635412	0.899648	1.31414	1.97756	1.01216	0.63719	0.902561	1.31843	1.98051	1.01503
1041	361.98	57.425	43.229	33.22	26.372	21.795	0.637468	0.904136	1.32148	1.97717	1.01594	0.636794	0.901932	1.31835	1.98085	1.01459
1042	360.193	57.3633	43.228	33.216	26.37	21.7833	0.637044	0.899404	1.31534	1.96326	1.01235	0.635477	0.900801	1.31751	1.98351	1.01344
1043	360.5	57.46	43.224	33.21	26.367	21.82	0.633078	0.89999	1.31704	1.98208	1.0115	0.634517	0.899862	1.31698	1.98628	1.01264
1044	361.367	57.4244	43.218	33.202	26.363	21.8578	0.63592	0.901974	1.32098	2.00527	1.01603	0.634443	0.899753	1.31768	1.98673	1.01269
1045	360.649	57.442	43.212	33.194	26.358	21.869	0.633607	0.900002	1.31893	2.00852	1.01383	0.63389	0.898999	1.31748	1.99028	1.0123
1046	358.304	57.452	43.213	33.192	26.359	21.858	0.629089	0.893883	1.31093	1.99014	1.00664	0.633363	0.898809	1.3181	1.99287	1.01216
1047	360.308	57.3978	43.21	33.189	26.36	21.8122	0.634891	0.898882	1.31904	1.98068	1.01251	0.633687	0.898236	1.31809	1.99373	1.01224
1048	360.441	57.424	43.202	33.177	26.351	21.85	0.633598	0.898855	1.3201	2.00201	1.01321	0.633808	0.897761	1.31817	1.99041	1.01197
1049	360.381	57.431	43.206	33.174	26.347	21.8	0.633359	0.898079	1.31969	1.98142	1.01143	0.633747	0.89723	1.31806	1.9896	1.01169
1050	359.68	57.37	43.217	33.181	26.353	21.83	0.635342	0.895974	1.31693	1.98806	1.01204	0.634566	0.897615	1.31925	1.98838	1.01243
1051	360.898	57.392	43.223	33.183	26.356	21.804	0.636774	0.89865	1.32158	1.98208	1.0141	0.634018	0.896835	1.31868	1.98892	1.01178
1052	359.95	57.44	43.228	33.188	26.361	21.868	0.63318	0.89629	1.31811	2.00284	1.01189	0.634668	0.896572	1.31889	1.98829	1.0121
1053	360.171	57.413	43.229	33.186	26.361	21.817	0.634819	0.896572	1.31931	1.98157	1.01183	0.635249	0.896685	1.31967	1.99131	1.01282
1054	358.943	57.447	43.227	33.183	26.359	21.837	0.631053	0.893426	1.315	1.98443	1.00798	0.635554	0.89688	1.32066	1.99599	1.01352
1055	360.528	57.35	43.226	33.178	26.358	21.846	0.638148	0.897014	1.32158	1.99761	1.01546	0.635053	0.896207	1.32037	1.99799	1.01308
1056	361.346	57.406	43.234	33.184	26.367	21.856	0.637429	0.898871	1.32517	2.00258	1.01644	0.635211	0.896183	1.32114	1.99356	1.013
1057	360.836	57.378	43.227	33.174	26.36	21.896	0.637474	0.897334	1.32388	2.02081	1.01696	0.635208	0.896112	1.32184	1.9972	1.01331
1058	359.542	57.42	43.226	33.171	26.359	21.856	0.633264	0.893938	1.31952	1.99612	1.01097	0.635584	0.896139	1.32276	1.9966	1.01365
1059	360.528	57.431	43.221	33.163	26.353	21.782	0.634286	0.896122	1.32352	1.97182	1.01133	0.635284	0.895833	1.32312	1.9992	1.01358
1060	360.617	57.425	43.223	33.162	26.354	21.862	0.6348	0.896076	1.32424	2.007	1.01402	0.634786	0.895122	1.32293	1.99673	1.01285
1061	359.734	57.4091	43.217	33.153	26.347	21.8055	0.633687	0.893615	1.32138	1.98024	1.01038	0.63368	0.893899	1.32192	1.99029	1.0112
1062	360.385	57.38	43.215	33.147	26.343	21.8736	0.636048	0.894876	1.32416	2.01586	1.01499	0.633273	0.893257	1.32176	1.98852	1.01059
1063	360.13	57.42	43.218	33.146	26.345	21.81	0.633942	0.893889	1.32381	1.98528	1.01132	0.632792	0.892676	1.3217	1.99352	1.01041
1064	358.177	57.4333	43.214	33.139	26.339	21.8067	0.629735	0.888776	1.31683	1.97567	1.00536	0.632629	0.891849	1.32132	1.99163	1.00987
1065	358.482	57.4271	43.211	33.135	26.337	21.8193	0.630414	0.889446	1.31834	1.98376	1.00675	0.632756	0.892084	1.32247	1.99433	1.01037
1066	359.676	57.46	43.208	33.128	26.332	21.8514	0.630921	0.892053	1.32312	2.00686	1.01008	0.632352	0.891737	1.32272	1.9922	1.0099
1067	359.106	57.376	43.208	33.124	26.331	21.828	0.633657	0.890287	1.3216	1.9937	1.0102	0.632448	0.891641	1.32334	1.99523	1.01021
1068	361.184	57.4353	43.206	33.12	26.328	21.8113	0.634576	0.895261	1.32945	1.99917	1.01388	0.632851	0.891725	1.32417	1.99694	1.01073
1069	360.121	57.4268	43.209	33.121	26.331	21.8316	0.63322	0.892449	1.32592	2.00093	1.01171	0.632819	0.891267	1.32428	1.99836	1.01067
1070	360.61	57.42	43.214	33.121	26.333	21.84	0.634609	0.893218	1.32812	2.00651	1.01352	0.632427	0.890687	1.32412	1.99419	1.00994
1071	359.124	57.4033	43.21	33.115	26.327	21.81	0.632558	0.889362	1.32264	1.98763	1.00897	0.632091	0.890704	1.32486	1.99643	1.00998
1072	358.007	57.4133	43.211	33.112	26.327	21.8378	0.63019	0.886243	1.31911	1.9937	1.00633	0.631406	0.889332	1.32352	1.99869	1.00905
1073	358.783	57.4867	43.208	33.107	26.322	21.7867	0.628181	0.88799	1.32197	1.97771	1.005	0.631264	0.888588	1.3231	1.99939	1.00871
1074	359.937	57.4747	43.221	33.115	26.333	21.8547	0.631305	0.890403	1.32681	2.00932	1.01049	0.631264	0.888447	1.3235	2.00024	1.00877
1075	358.054	57.4275	43.214	33.107	26.326	21.8838	0.629778	0.885658	1.32006	2.01505	1.00736	0.630932	0.887802	1.32324	1.99838	1.0082
1076	358.8	57.41	43.222	33.112	26.332	21.86	0.632224	0.88724	1.32301	2.00581	1.00928	0.630784	0.8874	1.3233	1.9974	1.00792
1077	360.891	57.435	43.218	33.106	26.327	21.8437	0.634612	0.892235	1.33092	2.01244	1.01399	0.631198	0.886935	1.32336	1.99945	1.00817
1078	358.042	57.4188	43.216	33.1	26.323	21.79	0.630234	0.884842	1.3208	1.97464	1.00493	0.631402	0.886489	1.32337	1.99855	1.0081
1079	357.543	57.4213	43.214	33.096	26.322	21.8231	0.629156	0.883433	1.31954	1.98685	1.00439	0.631518	0.886285	1.3238	1.99703	1.00808
1080	358.21	57.4075	43.217	33.095	26.323	21.8275	0.631074	0.884731	1.32239	1.99205	1.00677	0.631036	0.885728	1.32369	1.99569	1.00749
1081	359.315	57.4119	43.215	33.091	26.321	21.8363	0.632736	0.887285	1.32686	2.00298	1.01	0.630071	0.884516	1.32269	1.99237	1.00613
1082	358.183	57.4173	43.217	33.09	26.322	21.8547	0.63059	0.884229	1.32308	2.00446	1.00719	0.630016	0.884422	1.3233	1.99392	1.00625
1083	357.859	57.4407	43.214	33.086	26.32	21.8387	0.628852	0.88334	1.32227	1.99639	1.00516	0.629951	0.884633	1.32432	1.99515	1.0065
1084	358.131	57.4781	43.218	33.087	26.324	21.8231	0.627854	0.883751	1.32386	1.98923	1.00443	0.629886	0.884753	1.32521	1.99798	1.00681
1085	358.413	57.4481	43.222	33.088	26.326	21.8131	0.629849	0.884183	1.3251	1.9855	1.00579	0.629294	0.883784	1.32448	1.99743	1.00597
1086	358.78	57.4837	43.217	33.081	26.32	21.825	0.6287	0.884915	1.32665	1.99544	1.00615	0.629099	0.88386	1.3253	1.99631	1.00592
1087	359.152	57.456	43.218	33.079	26.321	21.858	0.630622	0.885571	1.32862	2.01183	1.00891	0.629342	0.883866	1.326	1.99881	1.00634
1088	357.201	57.4194	43.213	33.071	26.315	21.8481	0.628593	0.8805	1.32179	1.99917	1.00419	0.629444	0.883644	1.32638	1.9972	1.00628
1089	359.036	57.4781	43.213	33.068	26.313	21.8175	0.62922	0.884762	1.32878	1.99664	1.00681	0.629611	0.883321	1.32658	1.99294	1.00603
1090	358.546	57.4325	43.217	33.07	26.316	21.865	0.630555	0.88338	1.32716	2.01385	1.00807	0.629268	0.882315	1.32584	1.99455	1.00548
1091	358.172	57.4625	43.217	33.067	26.317	21.79	0.628571	0.882198	1.32656	1.97798	1.00406	0.629213	0.881592	1.32555	1.9966	1.0053
1092	358.095	57.3933	43.206	33.055	26.306	21.7283	0.631012	0.881921	1.32647	1.95566	1.00405	0.630046	0.882188	1.32719	1.99754	1.00632
1093	356.591	57.44	43.206	33.051	26.305	21.8625	0.626302	0.877871	1.32149	2.0067	1.00229	0.630186	0.881606	1.32707	2.00182	1.00647
1094	357.805	57.4012	43.208	33.049	26.306	21.8913	0.630238	0.880512	1.32658	2.02619	1.00762	0.629878	0.881014	1.32697	1.9958	1.00568
1095	359.566	57.375	43.206	33.045	26.303	21.8212	0.634423	0.884671	1.3333	2.00572	1.01133	0.629999	0.880935	1.32757	1.99671	1.00588
1096	358.054	57.41	43.206	33.042	26.301	21.8841	0.630198	0.88069	1.32789	2.02662	1.00787	0.630143	0.881269	1.32888	2.00273	1.00666
1097	357.566	57.4362	43.211	33.044	26.305	21.7713	0.628401	0.879232	1.32648	1.97169	1.00257	0.63035	0.881707	1.33025	2.00326	1.00716
1098	358.619	57.4581	43.214	33.045	26.308	21.79	0.629416	0.881649	1.33078	1.98439	1.00543	0.630003	0.881415	1.3305	1.99976	1.00666
1099	359.823	57.45	43.217	33.044	26.309	21.8063	0.632022	0.884259	1.33564	1.99779	1.0095	0.629537	0.881357	1.33109	2.00025	1.00646
1100	358.541	57.4938	43.215	33.04	26.306	21.8475	0.627753	0.880937	1.33109	2.01044	1.00583	0.6296	0.880957	1.33119	1.9996	1.00635
1101	357.642	57.4537	43.212	33.034	26.303	21.8363	0.627806	0.878469	1.32834	2.00169	1.00412	0.62989	0.881197	1.33225	2.0022	1.00693
1102	360.072	57.4712	43.209	33.029	26.298	21.8175	0.631164	0.884264	1.33737	2.00911	1.00991	0.630007	0.880552	1.332	2.00428	1.00689
1103	357.618	57.3819	43.205	33.021	26.292	21.8706	0.630636	0.877892	1.32865	2.0221	1.00706	0.62996	0.880236	1.33219	2.00775	1.007
1104	358.918	57.438	43.205	33.019	26.292	21.7827	0.630433	0.88091	1.33387	1.98986	1.00663	0.629528	0.879012	1.33105	2.00531	1.00601
1105	357.519	57.38	43.198	33.008	26.283	21.8118	0.630233	0.877132	1.32907	1.99899	1.00516	0.629577	0.878431	1.33082	2.00103	1.00554
1106	359.594	57.4362	43.205	33.013	26.289	21.8431	0.631697	0.882049	1.33698	2.02206	1.01029	0.629709	0.878104	1.33107	1.99916	1.00544
1107	355.75	57.4413	43.205	33.01	26.288	21.8263	0.624726	0.872364	1.32308	1.99333	0.998877	0.629282	0.877744	1.3312	1.99698	1.00493
1108	356.688	57.41	43.214	33.016	26.295	21.7725	0.628148	0.874406	1.32676	1.97174	1.00088	0.628505	0.876732	1.33039	2.00066	1.00422
1109	359.847	57.4425	43.21	33.01	26.292	21.785	0.632088	0.881979	1.33912	1.99605	1.00918	0.628005	0.876038	1.33005	2.00381	1.00382
1110	357.115	57.4282	43.204	33.005	26.29	21.8412	0.627652	0.875367	1.32954	2.00679	1.0035	0.625117	0.87175	1.32441	1.99071	0.998939
1111	356.591	57.4688	43.205	33.003	26.291	21.8682	0.624992	0.873827	1.32819	2.01566	1.00164	0.623105	0.869145	1.32126	1.98395	0.995925
1112	356.029	57.4037	43.202	32.998	26.289	21.885	0.626734	0.872277	1.32668	2.02105	1.00237	0.621493	0.866425	1.31795	1.98158	0.993386
1113	347.833	57.42	43.199	32.993	26.291	21.7862	0.611477	0.852029	1.2975	1.93037	0.976132	0.618283	0.861886	1.31185	1.97439	0.988526
1114	348.725	57.475	43.198	32.991	26.29	21.81	0.610641	0.854132	1.30102	1.94601	0.977779	0.615383	0.858079	1.30688	1.96328	0.98402
1115	349.263	57.3467	43.192	32.984	26.286	21.82	0.61687	0.855367	1.30361	1.95512	0.983102	0.613184	0.854413	1.30209	1.94831	0.979785
1116	347.223	57.4305	43.191	32.981	26.285	21.8236	0.609615	0.850204	1.29638	1.94572	0.975159	0.610863	0.851141	1.29794	1.93173	0.975592
1117	346.752	57.4671	43.194	32.98	26.285	21.7912	0.607355	0.848718	1.29482	1.92905	0.971952	0.61169	0.850626	1.29781	1.9199	0.975137
1118	346.592	57.41	43.196	32.98	26.287	21.7525	0.609597	0.848161	1.29461	1.91086	0.972004	0.61256	0.850814	1.2988	1.91329	0.975463
1119	347.258	57.4156	43.195	32.974	26.284	21.7267	0.610486	0.849373	1.29767	1.90494	0.973014	0.611839	0.849524	1.29757	1.90231	0.973695
1120	346.905	57.245	43.195	32.973	26.284	21.59	0.617269	0.848427	1.29655	1.8476	0.972949	0.611722	0.848629	1.29686	1.89525	0.972774
1121	349.912	57.3712	43.187	32.961	26.273	21.6682	0.616729	0.855446	1.30798	1.89973	0.980064	0.611967	0.847749	1.29617	1.88745	0.972036
1122	346.322	57.3413	43.19	32.96	26.274	21.6644	0.611823	0.84634	1.29495	1.87826	0.97072	0.611856	0.847073	1.29574	1.88612	0.971597
1123	345.44	57.3805	43.195	32.962	26.275	21.7209	0.608793	0.843937	1.29146	1.89632	0.968718	0.612369	0.84697	1.2961	1.88437	0.971823
1124	344.977	57.3559	43.196	32.96	26.274	21.6729	0.609075	0.842558	1.28992	1.87444	0.966784	0.611546	0.84644	1.29587	1.89227	0.971632
1125	345.434	57.3847	43.2	32.961	26.275	21.7335	0.608814	0.843427	1.29163	1.90155	0.968928	0.611028	0.845128	1.2944	1.89223	0.970664
1126	347.675	57.3544	43.2	32.958	26.273	21.6806	0.614077	0.84865	1.30021	1.89268	0.974596	0.61145	0.845277	1.29515	1.89391	0.971195
1127	346.167	57.3562	43.204	32.959	26.276	21.7281	0.611508	0.844722	1.29495	1.90289	0.971613	0.612468	0.845769	1.29649	1.89379	0.97218
1128	346.899	57.3481	43.203	32.955	26.272	21.7063	0.613108	0.846261	1.29769	1.89947	0.973292	0.613167	0.846	1.29745	1.89513	0.972919
1129	347.46	57.3325	43.203	32.952	26.271	21.675	0.614778	0.847381	1.30018	1.89001	0.974437	0.61359	0.846073	1.29823	1.89386	0.973237
1130	347.529	57.3141	43.208	32.955	26.276	21.6924	0.61592	0.847385	1.30083	1.89549	0.97561	0.613162	0.845089	1.29739	1.89626	0.972679
1131	346.313	57.3016	43.2	32.944	26.267	21.6711	0.613962	0.844172	1.29666	1.8838	0.971956	0.613836	0.845722	1.29905	1.89351	0.973365
1132	346.321	57.3512	43.199	32.94	26.265	21.6906	0.61178	0.843943	1.29708	1.89271	0.971158	0.613772	0.845263	1.29904	1.89001	0.972939
1133	345.526	57.3329	43.197	32.935	26.261	21.7371	0.611077	0.841761	1.2943	1.90943	0.970691	0.613502	0.844739	1.29893	1.88897	0.972512
1134	348.661	57.35	43.205	32.94	26.269	21.6417	0.616226	0.849149	1.30663	1.8837	0.976412	0.613385	0.844303	1.29893	1.88837	0.972254
1135	346.258	57.3353	43.206	32.938	26.267	21.65	0.61266	0.843052	1.29762	1.87491	0.970311	0.613297	0.844592	1.30006	1.8907	0.972607
1136	346.629	57.3412	43.202	32.931	26.262	21.6594	0.612888	0.843709	1.29941	1.8828	0.971447	0.613227	0.84454	1.30065	1.89475	0.972891
1137	346.954	57.3035	43.202	32.929	26.261	21.6747	0.615099	0.844334	1.30082	1.89125	0.9738	0.613649	0.84517	1.30232	1.89562	0.973657
1138	347.854	57.3735	43.195	32.918	26.252	21.6753	0.613346	0.846194	1.30458	1.90013	0.974428	0.613525	0.845155	1.30292	1.89959	0.973922
1139	346.846	57.3839	43.199	32.92	26.256	21.7422	0.611294	0.843579	1.30119	1.92102	0.973146	0.613446	0.845181	1.30364	1.90349	0.974238
1140	348.015	57.3653	43.196	32.914	26.252	21.71	0.61403	0.846175	1.30597	1.91554	0.976053	0.613272	0.845153	1.30427	1.90993	0.974628
1141	349.263	57.3883	43.199	32.915	26.254	21.6861	0.615362	0.849044	1.31085	1.91151	0.978266	0.61251	0.844155	1.30343	1.91096	0.973766
1142	346.974	57.3694	43.198	32.911	26.252	21.6918	0.612101	0.843233	1.30265	1.90217	0.972524	0.612914	0.844009	1.30386	1.91236	0.974124
1143	347.191	57.3882	43.198	32.908	26.251	21.7488	0.611672	0.843515	1.30386	1.9279	0.974176	0.61322	0.843791	1.30422	1.9077	0.97399
1144	344.752	57.3325	43.198	32.905	26.249	21.7092	0.60977	0.837345	1.29489	1.89848	0.967769	0.612521	0.842761	1.30328	1.90468	0.972879
1145	348.042	57.3212	43.2	32.905	26.251	21.6953	0.616171	0.845173	1.30764	1.90993	0.976937	0.611954	0.841782	1.3025	1.90794	0.972294
1146	346.825	57.3365	43.202	32.905	26.254	21.6624	0.613438	0.842053	1.30366	1.88835	0.972203	0.611783	0.841421	1.30262	1.90907	0.972156
1147	345.653	57.3882	43.202	32.902	26.252	21.6906	0.609134	0.838963	1.29945	1.89444	0.968279	0.611749	0.841102	1.30279	1.90871	0.972028
1148	347.119	57.3978	43.204	32.9	26.252	21.7657	0.611391	0.842195	1.30535	1.93431	0.974173	0.612163	0.841556	1.3042	1.91107	0.972791
1149	346.57	57.3817	43.199	32.893	26.246	21.71	0.610904	0.8407	1.30348	1.91011	0.971555	0.611707	0.841059	1.30415	1.9107	0.972307
1150	346.877	57.38	43.197	32.889	26.244	21.74	0.611431	0.841282	1.30503	1.92538	0.973281	0.611055	0.840374	1.30381	1.91256	0.971742
1151	346.701	57.3471	43.2	32.888	26.245	21.7188	0.612673	0.840527	1.30476	1.91497	0.973106	0.611439	0.840605	1.30486	1.91423	0.972316
1152	347.282	57.3647	43.201	32.886	26.245	21.6932	0.612977	0.841691	1.30734	1.90737	0.973553	0.611334	0.840213	1.30491	1.91212	0.97199
1153	345.555	57.3882	43.2	32.882	26.243	21.6994	0.608875	0.837262	1.30123	1.90133	0.968243	0.611702	0.840117	1.30545	1.9123	0.972278
1154	346.99	57.3775	43.199	32.879	26.241	21.69	0.611824	0.840577	1.30683	1.90612	0.972301	0.611911	0.839881	1.30579	1.90842	0.972126
1155	346.628	57.3888	43.198	32.875	26.238	21.7235	0.610656	0.839456	1.30567	1.91954	0.971892	0.611154	0.83902	1.30508	1.91175	0.971471
1156	346.963	57.3391	43.2	32.874	26.239	21.7009	0.613481	0.840022	1.30732	1.91139	0.97357	0.610993	0.838382	1.30477	1.91389	0.97125
1157	346.869	57.3488	43.2	32.872	26.239	21.6706	0.612893	0.839632	1.30736	1.89819	0.972214	0.611366	0.838585	1.30577	1.918	0.971955
1158	344.817	57.39	43.197	32.867	26.235	21.7876	0.607372	0.834504	1.29982	1.93833	0.968523	0.611311	0.838416	1.30621	1.92073	0.972102
1159	346.074	57.3365	43.196	32.862	26.233	21.7324	0.61185	0.837222	1.30515	1.92236	0.972006	0.611336	0.837902	1.30618	1.92023	0.971908
1160	346.779	57.3747	43.197	32.86	26.233	21.7412	0.611486	0.838683	1.3082	1.93006	0.973181	0.610858	0.837384	1.30608	1.92118	0.971479
1161	347.14	57.3916	43.198	32.859	26.234	21.7263	0.611438	0.839395	1.30996	1.92527	0.973328	0.610646	0.837006	1.30618	1.92621	0.971557
1162	345.778	57.35	43.198	32.856	26.234	21.7224	0.610829	0.835859	1.30541	1.91603	0.970533	0.61089	0.836623	1.30629	1.92263	0.971371
1163	346.099	57.3782	43.197	32.852	26.23	21.7188	0.610136	0.836393	1.30663	1.91801	0.97057	0.611006	0.836823	1.30724	1.9234	0.971692
1164	346.377	57.36	43.197	32.851	26.231	21.7522	0.611412	0.836983	1.30807	1.93344	0.972757	0.610462	0.836147	1.3068	1.92105	0.97091
1165	344.342	57.3247	43.191	32.842	26.223	21.7235	0.60908	0.831825	1.30058	1.91324	0.967222	0.61009	0.835075	1.30576	1.92045	0.970131
1166	347.257	57.36	43.19	32.838	26.22	21.7167	0.612662	0.838622	1.31179	1.92778	0.974254	0.609696	0.83455	1.30557	1.92134	0.969735
1167	345.391	57.3994	43.19	32.836	26.22	21.7076	0.607679	0.833954	1.30513	1.91358	0.967704	0.6098	0.834152	1.30561	1.92541	0.96993
1168	344.635	57.3395	43.188	32.831	26.217	21.7321	0.608832	0.831888	1.30267	1.92109	0.967875	0.60958	0.833727	1.30564	1.92432	0.969582
1169	344.857	57.3643	43.186	32.826	26.215	21.73	0.60807	0.832184	1.3041	1.92228	0.967766	0.609662	0.833927	1.30656	1.92155	0.969649
1170	345.548	57.3317	43.19	32.827	26.217	21.7789	0.610868	0.833609	1.30691	1.94648	0.971929	0.60912	0.833166	1.30606	1.9219	0.969001
1171	345.812	57.3667	43.191	32.825	26.217	21.7278	0.609869	0.834006	1.30831	1.92579	0.970323	0.609393	0.833142	1.30666	1.92446	0.969412
1172	345.523	57.3618	43.193	32.826	26.217	21.6559	0.609656	0.833228	1.30702	1.89385	0.967692	0.609637	0.833192	1.3074	1.92487	0.96971
1173	345.649	57.3783	43.186	32.816	26.211	21.7342	0.608866	0.833291	1.30829	1.93021	0.969722	0.609263	0.832723	1.30728	1.92618	0.96938
1174	345.923	57.3747	43.188	32.816	26.211	21.7337	0.609589	0.833791	1.30932	1.93153	0.970575	0.609354	0.832693	1.3079	1.92197	0.969246
1175	345.377	57.3343	43.192	32.817	26.215	21.7271	0.61054	0.832234	1.30785	1.92395	0.969966	0.608971	0.83224	1.30776	1.92249	0.968864
1176	344.06	57.3957	43.189	32.812	26.212	21.7586	0.605453	0.8289	1.30326	1.93143	0.965453	0.608228	0.831376	1.30711	1.92784	0.968353
1177	346.061	57.34	43.192	32.811	26.213	21.7	0.611501	0.833399	1.31123	1.91702	0.97099	0.608033	0.830993	1.30714	1.92686	0.968042
1178	345.029	57.3959	43.19	32.808	26.21	21.7394	0.607194	0.830834	1.30732	1.92944	0.967647	0.607947	0.830308	1.30677	1.92415	0.967533
1179	343.645	57.4	43.187	32.801	26.205	21.7567	0.604455	0.827183	1.30247	1.93131	0.964121	0.608163	0.830927	1.30841	1.92648	0.968252
1180	345.134	57.39	43.187	32.799	26.205	21.7188	0.607501	0.830606	1.30851	1.92332	0.967542	0.608861	0.831651	1.31021	1.92826	0.969299
1181	344.566	57.3292	43.184	32.793	26.201	21.6971	0.608982	0.829002	1.30676	1.91259	0.967011	0.608433	0.831049	1.30991	1.92942	0.968857
1182	347.778	57.3953	43.19	32.797	26.207	21.7259	0.612056	0.836567	1.31934	1.94024	0.975002	0.608583	0.830799	1.31022	1.9288	0.96887
1183	346.795	57.395	43.19	32.794	26.205	21.745	0.61034	0.833963	1.31581	1.94392	0.972777	0.610042	0.832196	1.31303	1.92754	0.970573
1184	344.942	57.3628	43.191	32.791	26.204	21.7244	0.608502	0.829188	1.30918	1.92509	0.967897	0.610281	0.832076	1.31343	1.92679	0.97069
1185	344.964	57.3687	43.19	32.788	26.202	21.7222	0.608244	0.829082	1.30946	1.9251	0.967736	0.610161	0.832105	1.31409	1.93003	0.970919
1186	348.311	57.3606	43.194	32.79	26.204	21.6747	0.61467	0.836965	1.32217	1.92255	0.976048	0.609645	0.830902	1.31277	1.92748	0.969841
1187	345.35	57.37	43.197	32.792	26.208	21.7067	0.609169	0.829769	1.31132	1.91804	0.968362	0.608555	0.829256	1.31079	1.92277	0.968024
1188	345.246	57.3876	43.195	32.786	26.204	21.7441	0.608143	0.829202	1.31133	1.93529	0.968609	0.608685	0.829137	1.31119	1.92389	0.968191
1189	344.874	57.3643	43.194	32.783	26.202	21.717	0.608444	0.828149	1.31011	1.92236	0.96746	0.608627	0.828781	1.31122	1.9208	0.96784
1190	342.628	57.4039	43.192	32.777	26.198	21.7156	0.602714	0.82244	1.30198	1.91095	0.960057	0.60722	0.826598	1.30841	1.91839	0.965671
1191	345.158	57.3565	43.197	32.78	26.203	21.7388	0.609412	0.828353	1.31199	1.93293	0.969065	0.607098	0.825938	1.30807	1.9163	0.965189
1192	344.49	57.3647	43.196	32.777	26.201	21.6765	0.607836	0.826591	1.30965	1.90346	0.965276	0.606677	0.824893	1.30711	1.91164	0.964141
1193	342.509	57.3514	43.194	32.773	26.199	21.7057	0.604821	0.821679	1.30251	1.90567	0.960869	0.606436	0.824262	1.30682	1.91033	0.96365
1194	344.088	57.34	43.199	32.774	26.202	21.6828	0.608317	0.825152	1.30892	1.90347	0.964989	0.60748	0.824652	1.30811	1.91087	0.964652
1195	342.793	57.3644	43.204	32.777	26.208	21.7039	0.605195	0.821889	1.30459	1.90267	0.961268	0.60731	0.824509	1.30855	1.90997	0.964499
1196	343.66	57.3567	43.197	32.767	26.199	21.7083	0.606759	0.82373	1.30808	1.91319	0.964028	0.606987	0.824297	1.30888	1.91147	0.964363
1197	344.328	57.3124	43.201	32.769	26.203	21.7072	0.610017	0.825172	1.31102	1.91472	0.967071	0.608053	0.825609	1.31165	1.91508	0.96609
1198	345.336	57.3944	43.2	32.765	26.2	21.7189	0.608223	0.827349	1.31506	1.92662	0.967989	0.608438	0.826148	1.3131	1.91837	0.966925
1199	344.468	57.4167	43.196	32.759	26.195	21.6956	0.605576	0.825112	1.31196	1.91395	0.964325	0.609852	0.827689	1.31616	1.92194	0.968987
1200	346.968	57.3689	43.202	32.762	26.2	21.7078	0.612286	0.830862	1.32188	1.93094	0.972958	0.610224	0.827958	1.31716	1.9236	0.969555
1201	346.192	57.3667	43.202	32.761	26.2	21.7075	0.611013	0.828924	1.31913	1.9265	0.970835	0.610057	0.827812	1.31752	1.92708	0.969667
1202	347.891	57.3378	43.198	32.753	26.194	21.6822	0.615093	0.832674	1.32601	1.92768	0.9757	0.609524	0.826821	1.31652	1.92721	0.968861
1203	344.975	57.3511	43.198	32.752	26.194	21.7133	0.609362	0.825615	1.31509	1.9248	0.968004	0.609342	0.825799	1.31551	1.92703	0.968248
1204	344.46	57.34	43.196	32.747	26.191	21.75	0.608845	0.824146	1.31353	1.93909	0.967856	0.608714	0.824882	1.31467	1.92654	0.967392
1205	342.965	57.38	43.196	32.745	26.19	21.7417	0.604493	0.820412	1.30803	1.92749	0.962349	0.60797	0.823919	1.31382	1.92866	0.966609
1206	342.039	57.3511	43.201	32.747	26.194	21.7233	0.604304	0.817962	1.30489	1.91268	0.960034	0.607323	0.822702	1.31248	1.93303	0.965872
1207	344.847	57.3772	43.195	32.738	26.187	21.7144	0.607885	0.82444	1.31601	1.92757	0.966965	0.607065	0.822346	1.31255	1.93416	0.965667
1208	344.003	57.39	43.194	32.734	26.185	21.755	0.60581	0.822188	1.31319	1.94133	0.965352	0.606485	0.821919	1.31246	1.93073	0.964926
1209	344.892	57.311	43.189	32.727	26.178	21.775	0.610558	0.824154	1.31658	1.95828	0.970543	0.607045	0.82226	1.31364	1.9329	0.965692
1210	344.527	57.3717	43.195	32.731	26.184	21.7274	0.607556	0.823123	1.31559	1.93267	0.966567	0.607554	0.823099	1.31562	1.93529	0.96672
1211	343.769	57.4063	43.196	32.73	26.184	21.6963	0.604788	0.821156	1.3129	1.91507	0.962669	0.607586	0.823082	1.3162	1.93794	0.966978
1212	344.555	57.35	43.192	32.723	26.179	21.745	0.60841	0.822798	1.3163	1.94269	0.967715	0.607828	0.823068	1.31674	1.93513	0.967025
1213	345.088	57.3816	43.189	32.717	26.175	21.7037	0.607867	0.823835	1.31874	1.92945	0.967232	0.607746	0.823623	1.31822	1.9335	0.967264
1214	345.389	57.3923	43.193	32.718	26.177	21.74	0.608111	0.824318	1.32009	1.94607	0.968772	0.60805	0.823809	1.3191	1.93454	0.967704
1215	344.522	57.3717	43.194	32.717	26.177	21.695	0.607508	0.82209	1.31698	1.9217	0.965678	0.607749	0.823213	1.31873	1.93717	0.967422
1216	347.08	57.42	43.195	32.716	26.177	21.72	0.609982	0.828037	1.32696	1.94683	0.972213	0.607366	0.82258	1.31831	1.9334	0.966669
1217	345.666	57.369	43.195	32.713	26.175	21.7205	0.609682	0.824428	1.32176	1.93997	0.969649	0.606992	0.821705	1.31742	1.93187	0.965914
1218	342.612	57.404	43.192	32.708	26.171	21.741	0.602681	0.816988	1.31028	1.93348	0.960693	0.606632	0.820762	1.31647	1.93153	0.96521
1219	343.32	57.3667	43.197	32.709	26.174	21.695	0.605731	0.818364	1.31339	1.91628	0.962445	0.606346	0.820191	1.3161	1.93358	0.964911
1220	343.079	57.3639	43.193	32.704	26.169	21.6989	0.605254	0.817712	1.31247	1.91874	0.96195	0.606456	0.81949	1.3156	1.92999	0.964445
1221	343.177	57.3661	43.199	32.707	26.175	21.7611	0.605588	0.817712	1.31345	1.94374	0.963846	0.605849	0.818561	1.31471	1.92815	0.963505
1222	343.372	57.375	43.198	32.705	26.174	21.74	0.605508	0.818097	1.31439	1.93602	0.96358	0.605363	0.817797	1.31404	1.92606	0.962713
1223	345.582	57.3378	43.192	32.696	26.168	21.6722	0.610752	0.823128	1.32346	1.9217	0.968952	0.605964	0.818375	1.31553	1.93021	0.963752
1224	343.463	57.3756	43.193	32.695	26.168	21.7122	0.605433	0.817926	1.31555	1.92707	0.963071	0.605872	0.817895	1.3154	1.92916	0.963445
1225	340.857	57.4136	43.194	32.695	26.168	21.7272	0.599274	0.811642	1.30557	1.9189	0.955146	0.605869	0.817962	1.31605	1.92571	0.963339
1226	345.51	57.3567	43.195	32.692	26.167	21.7267	0.609939	0.822408	1.32379	1.94529	0.969717	0.606009	0.817731	1.31629	1.92345	0.963238
1227	342.224	57.3456	43.195	32.689	26.166	21.69	0.604613	0.814355	1.31161	1.91144	0.959807	0.605404	0.817124	1.31588	1.92434	0.962647
1228	343.896	57.3933	43.196	32.688	26.165	21.6861	0.605564	0.818176	1.31801	1.91954	0.963098	0.605566	0.816998	1.31624	1.92761	0.962956
1229	343.283	57.3443	43.194	32.683	26.162	21.6926	0.606491	0.816484	1.31607	1.92019	0.962878	0.606778	0.817919	1.31836	1.93295	0.964659
1230	344.353	57.3889	43.195	32.682	26.163	21.6978	0.606517	0.818875	1.32058	1.92797	0.964815	0.606216	0.816996	1.31748	1.93157	0.963777
1231	343.649	57.3537	43.19	32.675	26.157	21.7511	0.606567	0.817045	1.31808	1.94992	0.965235	0.605857	0.816864	1.31784	1.93528	0.963783
1232	344.156	57.3478	43.191	32.674	26.158	21.76	0.607758	0.818093	1.32042	1.95632	0.967061	0.605606	0.816491	1.31786	1.93876	0.963714
1233	343.316	57.3481	43.185	32.666	26.152	21.7178	0.606002	0.815942	1.31761	1.9356	0.963549	0.604994	0.816216	1.31804	1.9402	0.963344
1234	342.357	57.4011	43.186	32.664	26.151	21.7333	0.6021	0.813431	1.31413	1.93743	0.959849	0.604832	0.815642	1.31768	1.94212	0.963113
1235	343.353	57.4021	43.186	32.661	26.149	21.7332	0.60381	0.815566	1.31816	1.94387	0.962611	0.604778	0.815359	1.31784	1.9408	0.962921
1236	343.027	57.4244	43.184	32.656	26.146	21.7033	0.602205	0.814558	1.31731	1.9303	0.960291	0.604948	0.815544	1.31876	1.94274	0.963333
1237	343.22	57.3567	43.183	32.653	26.143	21.7233	0.605383	0.814862	1.31805	1.94144	0.963199	0.604794	0.815048	1.31855	1.94364	0.963091
1238	343.37	57.35	43.189	32.657	26.15	21.7267	0.60619	0.815064	1.31923	1.94067	0.963891	0.605363	0.815282	1.31953	1.94498	0.963746
1239	345.288	57.3657	43.19	32.655	26.149	21.767	0.608945	0.819383	1.32681	1.9699	0.969945	0.605448	0.814798	1.31928	1.94166	0.963392
1240	342.473	57.3456	43.192	32.654	26.149	21.74	0.604924	0.812471	1.31619	1.9419	0.961853	0.605233	0.813798	1.31821	1.94185	0.962777
1241	343.665	57.3717	43.196	32.655	26.151	21.7378	0.606083	0.815067	1.32098	1.94679	0.964433	0.604847	0.813318	1.31801	1.94413	0.962476
1242	342.48	57.36	43.194	32.652	26.148	21.69	0.604405	0.81218	1.31642	1.92059	0.960135	0.604426	0.81272	1.31758	1.94231	0.961831
1243	340.596	57.3679	43.193	32.649	26.148	21.74	0.600703	0.807558	1.30978	1.93169	0.955981	0.603676	0.811645	1.31636	1.93607	0.960434
1244	342.326	57.3932	43.193	32.647	26.147	21.7747	0.60268	0.811506	1.31664	1.95737	0.961092	0.602991	0.810702	1.31536	1.9352	0.959483
1245	342.125	57.3716	43.193	32.645	26.147	21.7105	0.603242	0.810876	1.31627	1.92791	0.959379	0.602981	0.810098	1.31493	1.93271	0.959055
1246	342.635	57.38	43.191	32.64	26.142	21.695	0.603698	0.811854	1.31823	1.92621	0.960165	0.603383	0.809988	1.31539	1.93559	0.959509
1247	340.176	57.36	43.189	32.636	26.14	21.7468	0.600127	0.805875	1.30917	1.93583	0.955197	0.60439	0.81089	1.31746	1.93452	0.96067
1248	342.367	57.3148	43.191	32.635	26.141	21.7048	0.606011	0.810836	1.31801	1.92939	0.961436	0.604224	0.810782	1.31789	1.93003	0.960308
1249	342.675	57.3074	43.199	32.641	26.149	21.7347	0.607219	0.81141	1.3196	1.94072	0.96331	0.603694	0.81034	1.31776	1.93218	0.959933
1250	343.781	57.3384	43.197	32.637	26.147	21.6805	0.607755	0.813874	1.32427	1.92423	0.964108	0.603514	0.810057	1.3179	1.9343	0.959869
1251	342.527	57.43	43.194	32.632	26.143	21.6967	0.601515	0.810752	1.31964	1.92589	0.958563	0.603922	0.810718	1.31955	1.93531	0.96064
1252	341.369	57.4257	43.191	32.626	26.138	21.7457	0.599535	0.807782	1.31538	1.943	0.95675	0.60378	0.810837	1.32037	1.93856	0.9609
1253	342.316	57.3984	43.193	32.626	26.139	21.73	0.602439	0.80987	1.31924	1.94101	0.959717	0.603179	0.810248	1.31996	1.93878	0.960272
1254	342.648	57.3985	43.192	32.623	26.137	21.728	0.602978	0.810504	1.32072	1.94289	0.960593	0.602483	0.809407	1.31918	1.9415	0.959603
1255	343.269	57.3753	43.191	32.618	26.135	21.7389	0.605017	0.811664	1.32373	1.95214	0.963256	0.602752	0.809227	1.31944	1.94069	0.959693
1256	341.45	57.344	43.188	32.614	26.131	21.736	0.603013	0.807287	1.31671	1.94226	0.958914	0.603186	0.809331	1.32019	1.93722	0.959892
1257	341.843	57.3633	43.188	32.611	26.131	21.7333	0.602884	0.807987	1.31884	1.94332	0.959426	0.603076	0.808794	1.31992	1.93442	0.959425
1258	342.514	57.3811	43.19	32.612	26.132	21.6726	0.603398	0.809497	1.32143	1.92019	0.959197	0.602636	0.807741	1.31883	1.93493	0.958663
1259	342.162	57.3858	43.19	32.61	26.133	21.6747	0.602576	0.80851	1.32068	1.91869	0.958139	0.602298	0.807059	1.31831	1.93443	0.958107
1260	341.241	57.37	43.191	32.608	26.132	21.6921	0.601666	0.806107	1.31733	1.92145	0.95645	0.602161	0.807026	1.31886	1.93594	0.958173
1261	340.048	57.36	43.189	32.604	26.13	21.7625	0.5999	0.803135	1.31313	1.94647	0.955257	0.602357	0.807359	1.31994	1.93979	0.95879
1262	341.733	57.3622	43.186	32.598	26.126	21.7417	0.602651	0.806887	1.32004	1.9486	0.95937	0.602439	0.806935	1.31984	1.94114	0.958763
1263	341.871	57.3732	43.177	32.587	26.115	21.7384	0.602049	0.807061	1.32058	1.95284	0.959376	0.602461	0.806399	1.31952	1.94355	0.958695
1264	343.315	57.3889	43.185	32.593	26.122	21.7658	0.60426	0.810317	1.32636	1.97026	0.963742	0.602463	0.806244	1.31985	1.94211	0.958595
1265	341.807	57.3374	43.189	32.594	26.124	21.6957	0.603969	0.80653	1.32074	1.92966	0.959009	0.602437	0.80617	1.32027	1.93825	0.958373
1266	341.12	57.34	43.191	32.594	26.126	21.72	0.602728	0.804756	1.31849	1.93554	0.957664	0.602185	0.80563	1.3199	1.93621	0.95785
1267	341.298	57.374	43.193	32.594	26.128	21.664	0.601682	0.805024	1.31959	1.91139	0.955749	0.602052	0.805107	1.31964	1.93135	0.95725
1268	340.341	57.3795	43.192	32.591	26.126	21.6932	0.59972	0.802614	1.31609	1.91943	0.9537	0.601714	0.8041	1.31858	1.92451	0.956124
1269	340.647	57.3667	43.194	32.59	26.126	21.7233	0.600887	0.803109	1.31748	1.93432	0.955709	0.60169	0.804119	1.31919	1.92518	0.956237
1270	340.865	57.3652	43.189	32.582	26.12	21.679	0.601121	0.803397	1.31873	1.91887	0.955174	0.601809	0.804373	1.32016	1.92558	0.956554
1271	340.876	57.3516	43.193	32.584	26.123	21.69	0.601889	0.80327	1.31897	1.92238	0.955863	0.602033	0.804018	1.32009	1.92834	0.956732
1272	342.38	57.368	43.192	32.581	26.121	21.696	0.603802	0.806663	1.325	1.93435	0.9598	0.602017	0.803679	1.32007	1.92907	0.956643
1273	342.391	57.38	43.198	32.585	26.126	21.71	0.603565	0.806536	1.32525	1.93835	0.959884	0.601716	0.803639	1.32053	1.92797	0.956431
1274	340.758	57.3209	43.199	32.584	26.126	21.7136	0.603244	0.802539	1.31913	1.9307	0.95699	0.601821	0.803855	1.32137	1.92964	0.956787
1275	339.877	57.3648	43.194	32.576	26.119	21.7039	0.599609	0.800239	1.31593	1.92452	0.953082	0.602053	0.80438	1.32279	1.934	0.957574
1276	341.009	57.4276	43.19	32.571	26.116	21.691	0.598781	0.802826	1.32071	1.92658	0.954226	0.602118	0.804165	1.32298	1.93688	0.957739
1277	341.958	57.3944	43.19	32.569	26.115	21.6869	0.601854	0.80491	1.3246	1.9306	0.957665	0.602209	0.803748	1.32287	1.93941	0.957786
1278	342.92	57.3991	43.194	32.57	26.119	21.7291	0.603516	0.806947	1.32894	1.95289	0.961368	0.602608	0.804404	1.32457	1.94222	0.958667
1279	342.193	57.3505	43.193	32.568	26.118	21.7411	0.604259	0.805159	1.32633	1.95452	0.96096	0.602741	0.804794	1.32581	1.94723	0.959356
1280	341.6	57.3255	43.191	32.564	26.116	21.75	0.604198	0.803615	1.32444	1.95603	0.960214	0.603272	0.80499	1.32672	1.94722	0.95988
1281	343.192	57.3522	43.195	32.565	26.119	21.72	0.606039	0.807131	1.33103	1.9504	0.963153	0.60326	0.804825	1.32706	1.95312	0.960213
1282	341.488	57.4068	43.191	32.559	26.114	21.7574	0.600541	0.802972	1.32462	1.95959	0.957904	0.602975	0.804238	1.32659	1.94977	0.95956
1283	342.074	57.387	43.193	32.559	26.115	21.676	0.602498	0.804199	1.3271	1.92653	0.957895	0.602815	0.804174	1.32703	1.9508	0.959554
1284	341.982	57.3984	43.191	32.554	26.111	21.7753	0.601766	0.803755	1.32695	1.97188	0.959998	0.602666	0.804314	1.32777	1.95095	0.959615
1285	341.656	57.3916	43.192	32.553	26.11	21.6832	0.601525	0.802838	1.32569	1.92946	0.956793	0.602228	0.804061	1.32781	1.9519	0.959311
1286	342.547	57.3895	43.191	32.549	26.107	21.7416	0.603141	0.804706	1.32935	1.96171	0.960919	0.602423	0.803661	1.32758	1.94705	0.958969
1287	342.566	57.394	43.195	32.551	26.11	21.734	0.603152	0.804599	1.32963	1.95707	0.960645	0.602762	0.803174	1.32729	1.94315	0.958725
1288	342.954	57.4163	43.197	32.551	26.111	21.73	0.602971	0.805358	1.33134	1.95705	0.961023	0.60268	0.80286	1.32727	1.93604	0.95813
1289	340.809	57.3574	43.202	32.554	26.114	21.6895	0.601908	0.800171	1.32302	1.92568	0.955506	0.602535	0.802372	1.32696	1.93518	0.957772
1290	341.17	57.31	43.209	32.558	26.121	21.63	0.604868	0.800793	1.32503	1.89919	0.956194	0.601931	0.801254	1.32563	1.92912	0.956449
1291	341.527	57.409	43.207	32.555	26.12	21.678	0.601195	0.801556	1.32683	1.92215	0.955828	0.60237	0.801206	1.32611	1.92963	0.956803
1292	340.68	57.39	43.207	32.553	26.118	21.69	0.600508	0.799418	1.32354	1.92344	0.954286	0.601925	0.79998	1.3246	1.9266	0.955703
1293	339.663	57.3842	43.206	32.55	26.117	21.6926	0.598918	0.796882	1.32	1.91927	0.951662	0.60202	0.799886	1.32503	1.93062	0.95603
1294	342.905	57.342	43.201	32.542	26.111	21.7387	0.606224	0.804261	1.33301	1.96065	0.963125	0.601639	0.799991	1.32572	1.93469	0.956173
1295	339.747	57.3646	43.205	32.545	26.114	21.7263	0.599855	0.796781	1.32074	1.93579	0.953321	0.601731	0.799736	1.32588	1.93688	0.956295
1296	341.006	57.3489	43.201	32.538	26.109	21.7458	0.602571	0.799507	1.32605	1.95387	0.957796	0.601595	0.799364	1.32579	1.93677	0.956058
1297	341.932	57.4	43.205	32.54	26.112	21.6775	0.602206	0.80153	1.32986	1.92768	0.957191	0.602351	0.800059	1.32746	1.94026	0.957214
1298	341.28	57.3767	43.2	32.532	26.107	21.7033	0.601834	0.799775	1.32794	1.93748	0.956681	0.6025	0.80036	1.32846	1.94166	0.95763
1299	340.047	57.3821	43.203	32.534	26.108	21.6863	0.599557	0.796812	1.32294	1.92261	0.952626	0.601897	0.799886	1.32823	1.94105	0.957013
1300	342.25	57.36	43.199	32.527	26.102	21.7	0.604212	0.801748	1.33171	1.94372	0.959759	0.60157	0.799507	1.3281	1.93665	0.956386
1301	344.32	57.375	43.2	32.525	26.101	21.7325	0.607266	0.80637	1.33998	1.97047	0.966038	0.601323	0.799171	1.32803	1.9387	0.956225
1302	338.871	57.4211	43.198	32.521	26.099	21.713	0.595634	0.79346	1.31918	1.93153	0.949001	0.600979	0.798572	1.32748	1.93799	0.955679
1303	340.384	57.376	43.2	32.521	26.099	21.674	0.600282	0.796854	1.32507	1.92307	0.953403	0.601495	0.799204	1.32905	1.94173	0.956663
1304	341.441	57.4125	43.197	32.516	26.095	21.6995	0.600473	0.799178	1.32939	1.94199	0.956069	0.601389	0.798476	1.32842	1.93925	0.956101
1305	339.968	57.3789	43.2	32.517	26.098	21.7	0.599425	0.795583	1.32407	1.93252	0.952854	0.600597	0.796837	1.32627	1.92971	0.954152
1306	342.448	57.3976	43.204	32.519	26.101	21.708	0.603174	0.801236	1.33394	1.94883	0.959519	0.601241	0.797184	1.32741	1.92727	0.954681
1307	340.585	57.3205	43.211	32.523	26.108	21.6879	0.603466	0.796652	1.3273	1.92634	0.955823	0.601221	0.796998	1.32769	1.92833	0.954702
1308	339.928	57.332	43.209	32.518	26.104	21.64	0.601728	0.794893	1.32495	1.90372	0.952393	0.600723	0.796094	1.32677	1.92422	0.953695
1309	340.387	57.3795	43.2	32.508	26.096	21.651	0.600139	0.795892	1.32715	1.91442	0.952703	0.600743	0.795919	1.32706	1.9256	0.953764
1310	340.304	57.374	43.198	32.504	26.093	21.686	0.600141	0.795549	1.32703	1.93047	0.953553	0.600314	0.794727	1.32567	1.92339	0.952751
1311	339.214	57.4053	43.2	32.504	26.094	21.6616	0.596987	0.792853	1.32299	1.91326	0.949019	0.600503	0.795128	1.32687	1.92773	0.953435
1312	339.953	57.37	43.195	32.496	26.087	21.711	0.599563	0.794356	1.32607	1.94214	0.953343	0.600091	0.7949	1.327	1.93371	0.953477
1313	339.359	57.3338	43.198	32.498	26.091	21.7029	0.600175	0.792894	1.32417	1.93338	0.952426	0.600411	0.794857	1.32742	1.94056	0.954132
1314	342.266	57.3421	43.194	32.491	26.085	21.7121	0.604791	0.799462	1.33572	1.95675	0.960611	0.601363	0.79556	1.32911	1.94294	0.955349
1315	339.688	57.38	43.199	32.494	26.089	21.724	0.598844	0.793293	1.32587	1.94552	0.952681	0.601901	0.795702	1.32985	1.94181	0.955764
1316	340.706	57.3411	43.201	32.495	26.091	21.7505	0.602377	0.795595	1.33005	1.96238	0.957293	0.602629	0.795758	1.33043	1.93747	0.95605
1317	342.919	57.325	43.197	32.487	26.084	21.6813	0.606807	0.800464	1.3389	1.94718	0.962073	0.603184	0.796415	1.33201	1.93565	0.956728
1318	340.116	57.3558	43.202	32.491	26.089	21.6263	0.60075	0.793847	1.32816	1.90533	0.951919	0.602166	0.795435	1.33086	1.93086	0.955293
1319	340.567	57.283	43.202	32.489	26.088	21.6343	0.604657	0.794752	1.33013	1.91172	0.955343	0.602276	0.795466	1.33141	1.93092	0.955448
1320	341.773	57.3488	43.204	32.49	26.091	21.6424	0.604061	0.797491	1.33526	1.92068	0.957175	0.602347	0.795091	1.33132	1.92751	0.95514
1321	339.772	57.4125	43.2	32.483	26.085	21.6683	0.597663	0.7926	1.32765	1.92324	0.950565	0.601314	0.793861	1.32979	1.92691	0.953812
1322	340.257	57.3875	43.201	32.481	26.084	21.7125	0.599615	0.793511	1.32975	1.94589	0.95377	0.601315	0.793948	1.33046	1.93374	0.954348
1323	340.057	57.3035	43.202	32.481	26.086	21.7005	0.602875	0.792971	1.32939	1.93853	0.955137	0.600621	0.79358	1.33041	1.93707	0.953977
1324	339.644	57.3568	43.195	32.472	26.079	21.7088	0.599577	0.791858	1.32819	1.94295	0.95277	0.60005	0.792926	1.32985	1.94152	0.95358
1325	340.788	57.3805	43.199	32.475	26.083	21.7211	0.60076	0.794451	1.33287	1.95319	0.955673	0.6003	0.792993	1.33047	1.94546	0.954081
1326	339.94	57.37	43.201	32.473	26.082	21.69	0.599795	0.792179	1.32976	1.935	0.952747	0.601697	0.794216	1.33303	1.94485	0.955693
1327	340.286	57.38	43.203	32.474	26.084	21.7255	0.600067	0.792912	1.33132	1.95185	0.954398	0.601012	0.793811	1.33288	1.94564	0.955144
1328	340.417	57.4	43.202	32.471	26.082	21.7195	0.59941	0.793069	1.33204	1.95083	0.954071	0.601384	0.794396	1.33429	1.94719	0.955865
1329	344.346	57.3286	43.202	32.469	26.081	21.6471	0.609394	0.802072	1.34763	1.94157	0.965056	0.601379	0.794127	1.33433	1.94894	0.955873
1330	339.316	57.3855	43.202	32.466	26.08	21.7165	0.598083	0.790137	1.32836	1.94406	0.951292	0.601336	0.794161	1.33484	1.95033	0.956008
1331	341.844	57.388	43.196	32.459	26.072	21.698	0.602177	0.795949	1.33805	1.95384	0.957815	0.601749	0.794561	1.33601	1.95189	0.956657
1332	340.49	57.37	43.2	32.46	26.075	21.744	0.600723	0.792574	1.33316	1.96542	0.955735	0.601521	0.793972	1.33551	1.95025	0.956137
1333	340.485	57.4027	43.204	32.462	26.078	21.7009	0.599498	0.792414	1.33335	1.9447	0.95369	0.600269	0.792596	1.33374	1.95238	0.954752
1334	341.997	57.384	43.204	32.459	26.076	21.72	0.602957	0.795712	1.33948	1.96279	0.958942	0.60046	0.792686	1.33434	1.95338	0.955042
1335	339.152	57.393	43.21	32.463	26.081	21.709	0.597814	0.788946	1.32855	1.93934	0.950432	0.600825	0.79246	1.33448	1.9551	0.955311
1336	340.748	57.391	43.208	32.458	26.078	21.724	0.600628	0.792437	1.33522	1.95652	0.955359	0.601413	0.792676	1.3354	1.95237	0.955715
1337	340.064	57.39	43.207	32.456	26.076	21.7185	0.599421	0.790772	1.33254	1.95102	0.95332	0.602112	0.793061	1.33651	1.95399	0.956536
1338	341.673	57.332	43.207	32.454	26.075	21.73	0.604732	0.794368	1.33906	1.9659	0.959703	0.602014	0.792624	1.33625	1.9507	0.956084
1339	341.647	57.3313	43.21	32.454	26.078	21.6896	0.604843	0.794085	1.33958	1.94629	0.958559	0.602627	0.793097	1.33753	1.95318	0.956956
1340	342.15	57.3596	43.207	32.449	26.071	21.6981	0.604393	0.795105	1.34113	1.95607	0.959436	0.601962	0.79229	1.33661	1.95101	0.955994
1341	341.16	57.3705	43.209	32.449	26.073	21.676	0.602268	0.792659	1.33767	1.93973	0.955779	0.602078	0.792358	1.33723	1.95047	0.956139
1342	341.019	57.3715	43.212	32.451	26.077	21.72	0.602103	0.792257	1.33754	1.95673	0.956535	0.600856	0.791264	1.3359	1.94787	0.954643
1343	338.727	57.418	43.209	32.446	26.073	21.711	0.595973	0.786786	1.32876	1.94135	0.948629	0.600874	0.791458	1.33667	1.95028	0.954969
1344	340.743	57.3961	43.204	32.438	26.066	21.6913	0.600235	0.791249	1.33688	1.94724	0.954336	0.600124	0.790289	1.33527	1.94871	0.953798
1345	338.818	57.412	43.204	32.437	26.067	21.718	0.596175	0.786705	1.32974	1.94768	0.94923	0.599834	0.789449	1.33432	1.94961	0.953242
1346	342.645	57.3645	43.205	32.436	26.067	21.7035	0.604974	0.795443	1.34497	1.96313	0.96084	0.599991	0.789692	1.33527	1.953	0.953752
1347	339.071	57.3542	43.206	32.434	26.067	21.7089	0.599141	0.786927	1.33136	1.94508	0.951237	0.601092	0.790562	1.3373	1.95327	0.955038
1348	339.037	57.3238	43.203	32.43	26.062	21.7065	0.600241	0.786774	1.33102	1.94604	0.951887	0.601396	0.790808	1.33822	1.95684	0.955649
1349	342.23	57.385	43.201	32.425	26.06	21.74	0.603197	0.793963	1.34419	1.9805	0.960107	0.601763	0.790798	1.33867	1.95854	0.956037
1350	341.854	57.364	43.207	32.428	26.064	21.666	0.603684	0.79287	1.34292	1.94324	0.957628	0.600803	0.789772	1.33738	1.95747	0.954827
1351	341.9	57.395	43.205	32.426	26.063	21.729	0.602361	0.792977	1.34331	1.9722	0.958616	0.601901	0.791051	1.33995	1.95772	0.956327
1352	339.259	57.3734	43.208	32.426	26.063	21.7348	0.598744	0.786634	1.33294	1.9596	0.951943	0.602312	0.791841	1.34183	1.9618	0.957358
1353	339.96	57.4133	43.207	32.425	26.063	21.7171	0.598253	0.788257	1.3359	1.95565	0.952369	0.601893	0.79109	1.34095	1.95832	0.9565
1354	343.342	57.35	43.205	32.42	26.059	21.65	0.606826	0.795879	1.3494	1.94682	0.961742	0.601619	0.790635	1.34059	1.95978	0.956204
1355	341.896	57.38	43.208	32.42	26.061	21.7324	0.603119	0.792307	1.34414	1.97463	0.9591	0.601623	0.790169	1.34028	1.95811	0.955897
1356	340.341	57.3857	43.211	32.423	26.064	21.7143	0.600262	0.788704	1.33803	1.95611	0.954101	0.601696	0.790102	1.3406	1.95652	0.955866
1357	340.892	57.3691	43.207	32.415	26.057	21.6943	0.601767	0.789687	1.34041	1.95347	0.955555	0.601967	0.790022	1.34097	1.95651	0.956054
1358	340.968	57.3587	43.208	32.414	26.058	21.71	0.602387	0.789717	1.34113	1.96049	0.956467	0.60119	0.789135	1.33999	1.95845	0.955232
1359	339.466	57.368	43.206	32.411	26.055	21.6995	0.599256	0.786166	1.33522	1.94849	0.951726	0.601489	0.789391	1.3409	1.95642	0.955509
1360	340.19	57.3709	43.2	32.403	26.049	21.7	0.600156	0.787696	1.33849	1.95556	0.95369	0.602055	0.789966	1.34242	1.95974	0.956467
1361	341.106	57.384	43.204	32.405	26.053	21.703	0.601386	0.78967	1.34251	1.96038	0.955988	0.601722	0.789524	1.34213	1.96078	0.95612
1362	343.081	57.372	43.2	32.399	26.048	21.673	0.605209	0.794095	1.3505	1.96046	0.961038	0.601949	0.789868	1.34317	1.96433	0.956732
1363	342.618	57.3789	43.203	32.398	26.047	21.7195	0.604225	0.792731	1.34868	1.9793	0.960806	0.602535	0.79055	1.34481	1.96699	0.957718
1364	339.998	57.382	43.202	32.396	26.045	21.71	0.599432	0.786595	1.33836	1.96077	0.953123	0.603002	0.790643	1.34546	1.96718	0.95814
1365	342.451	57.3818	43.207	32.399	26.05	21.7377	0.603978	0.792125	1.34845	1.98533	0.960752	0.602725	0.790195	1.34513	1.96872	0.957849
1366	342.001	57.3757	43.205	32.395	26.046	21.6995	0.60336	0.790938	1.34667	1.96712	0.958627	0.602178	0.789398	1.3442	1.97187	0.957279
1367	340.977	57.3338	43.207	32.394	26.047	21.691	0.603421	0.788349	1.34306	1.95692	0.956648	0.601787	0.788975	1.34394	1.97156	0.956825
1368	340.191	57.3957	43.208	32.395	26.049	21.7343	0.599447	0.786533	1.34018	1.97111	0.953948	0.601744	0.788665	1.34388	1.9719	0.956698
1369	341.111	57.3864	43.206	32.391	26.046	21.7445	0.601379	0.788513	1.34401	1.98253	0.957052	0.600963	0.78757	1.34246	1.96886	0.955441
1370	341.718	57.411	43.208	32.391	26.048	21.7271	0.60149	0.78977	1.34683	1.97714	0.957627	0.600698	0.787104	1.34212	1.96689	0.954943
1371	339.47	57.37	43.205	32.386	26.043	21.72	0.599135	0.78443	1.33797	1.96316	0.95223	0.600335	0.786511	1.34156	1.96232	0.954151
1372	339.544	57.392	43.209	32.388	26.046	21.724	0.598505	0.784456	1.33847	1.96404	0.951957	0.600738	0.786729	1.34242	1.96139	0.95454
1373	340.97	57.3815	43.21	32.388	26.047	21.683	0.601507	0.787679	1.34431	1.95331	0.95514	0.601792	0.788097	1.3453	1.9624	0.956133
1374	339.557	57.3405	43.213	32.388	26.049	21.639	0.60088	0.784196	1.33916	1.92495	0.951101	0.601715	0.787715	1.34509	1.95834	0.955677
1375	341.292	57.372	43.205	32.378	26.04	21.697	0.602266	0.788058	1.34621	1.96461	0.95667	0.60208	0.788075	1.34616	1.95988	0.956266
1376	345.734	57.4043	43.206	32.376	26.04	21.6957	0.608757	0.798093	1.36416	1.98956	0.968207	0.602998	0.789067	1.34841	1.96313	0.957686
1377	340.968	57.3904	43.206	32.376	26.04	21.6658	0.600956	0.787091	1.34536	1.94873	0.954433	0.602971	0.788562	1.34807	1.96147	0.957341
1378	340.94	57.365	43.199	32.368	26.033	21.715	0.601687	0.786954	1.34546	1.97395	0.956353	0.603422	0.789402	1.34998	1.96646	0.958475
1379	342.992	57.3789	43.204	32.369	26.037	21.7211	0.604929	0.791399	1.3542	1.9868	0.9619	0.603449	0.788949	1.34971	1.96687	0.958315
1380	339.88	57.3315	43.201	32.365	26.033	21.6569	0.601322	0.784146	1.34192	1.9417	0.952723	0.602882	0.787974	1.34845	1.96838	0.957527
1381	342.512	57.38	43.204	32.366	26.035	21.666	0.604035	0.790072	1.35252	1.9599	0.959041	0.602488	0.787792	1.34869	1.97112	0.957403
1382	340.328	57.3235	43.201	32.361	26.032	21.7075	0.602457	0.784889	1.34432	1.96744	0.955548	0.602132	0.787258	1.34833	1.97506	0.957162
1383	343.125	57.3867	43.203	32.362	26.033	21.7443	0.604789	0.791266	1.35537	2.00016	0.962688	0.601857	0.7867	1.34782	1.97171	0.95652
1384	340.857	57.4473	43.202	32.358	26.032	21.7018	0.598194	0.78582	1.34705	1.96792	0.953568	0.601922	0.786819	1.34849	1.97412	0.956833
1385	339.82	57.3781	43.2	32.353	26.027	21.7824	0.5992	0.783213	1.34295	2.00148	0.954667	0.601403	0.786228	1.34794	1.97802	0.956447
1386	341.708	57.37	43.203	32.355	26.03	21.679	0.603	0.787491	1.35062	1.96339	0.957407	0.601602	0.786791	1.34936	1.9791	0.957024
1387	340.681	57.354	43.201	32.351	26.026	21.6773	0.601782	0.784978	1.34656	1.95854	0.954912	0.600861	0.785761	1.34811	1.97445	0.955746
1388	341.161	57.4055	43.2	32.348	26.024	21.732	0.600402	0.785939	1.34867	1.98719	0.956342	0.601364	0.78593	1.34881	1.97731	0.956382
1389	342.477	57.38	43.201	32.347	26.025	21.69	0.603845	0.788826	1.35431	1.97507	0.959587	0.600782	0.785467	1.34846	1.97625	0.955735
1390	340.47	57.3976	43.202	32.346	26.025	21.699	0.599605	0.784061	1.34658	1.9676	0.953737	0.600836	0.785587	1.34916	1.97572	0.95587
1391	341.778	57.3992	43.199	32.342	26.022	21.7238	0.601713	0.787	1.35197	1.98794	0.958023	0.600962	0.785736	1.34994	1.97881	0.956285
1392	338.82	57.43	43.197	32.337	26.018	21.77	0.595131	0.779972	1.34048	1.994	0.95014	0.601021	0.78551	1.35005	1.977	0.956148
1393	342.513	57.3876	43.196	32.334	26.017	21.6476	0.603373	0.788329	1.35552	1.95974	0.958347	0.6006	0.784676	1.34908	1.97213	0.955162
1394	341.575	57.3664	43.197	32.333	26.017	21.7045	0.602665	0.786026	1.35202	1.98017	0.957818	0.600704	0.784543	1.34935	1.97128	0.955162
1395	340.88	57.38	43.196	32.331	26.016	21.7	0.600818	0.784353	1.34949	1.97451	0.955381	0.600425	0.784165	1.34916	1.96719	0.954582
1396	340.381	57.3614	43.2	32.332	26.017	21.6329	0.600895	0.78299	1.34751	1.94098	0.952687	0.601348	0.784628	1.3504	1.96392	0.955305
1397	340.506	57.3838	43.204	32.334	26.021	21.6814	0.600336	0.783133	1.34843	1.96163	0.953735	0.601276	0.784326	1.35034	1.9655	0.955234
1398	341.069	57.42	43.203	32.332	26.019	21.6671	0.599755	0.784354	1.35066	1.95933	0.953962	0.601161	0.784076	1.35038	1.96299	0.954925
1399	340.633	57.3575	43.202	32.329	26.017	21.6967	0.601592	0.783209	1.34915	1.97111	0.955203	0.601011	0.78368	1.35012	1.95917	0.954427
1400	342.036	57.3857	43.202	32.326	26.016	21.6771	0.602867	0.786217	1.35513	1.97077	0.957853	0.600314	0.783374	1.35007	1.96105	0.953978
1401	341.255	57.38	43.205	32.327	26.018	21.671	0.601861	0.784278	1.35226	1.96257	0.955655	0.600982	0.784256	1.35201	1.96661	0.955296
1402	340.113	57.3757	43.199	32.32	26.011	21.6457	0.599774	0.781581	1.34773	1.94783	0.951897	0.601146	0.783802	1.35173	1.96824	0.955293
1403	339.854	57.4513	43.196	32.315	26.008	21.66	0.596013	0.780843	1.34713	1.95408	0.949543	0.601373	0.783875	1.35234	1.9685	0.955554
1404	343.602	57.3981	43.2	32.317	26.01	21.7162	0.605014	0.789309	1.36199	2.00057	0.962958	0.60167	0.783892	1.35281	1.96772	0.95576
1405	340.157	57.35	43.198	32.312	26.007	21.6919	0.600899	0.781179	1.34876	1.97074	0.95394	0.601884	0.784305	1.35392	1.9628	0.955889
1406	341.263	57.3443	43.2	32.314	26.01	21.6857	0.603181	0.78372	1.35336	1.97294	0.957029	0.602762	0.784613	1.35488	1.96263	0.956663
1407	342.497	57.358	43.204	32.315	26.012	21.6552	0.604948	0.786338	1.35847	1.9653	0.959301	0.603697	0.784767	1.35559	1.96154	0.957333
1408	342.888	57.4124	43.205	32.315	26.012	21.5662	0.603363	0.787163	1.36002	1.92815	0.956554	0.603232	0.783661	1.35411	1.95503	0.956061
1409	341.43	57.2933	43.206	32.315	26.013	21.6281	0.605916	0.783742	1.35445	1.94662	0.957317	0.603109	0.783867	1.35489	1.95885	0.956379
1410	340.73	57.3429	43.206	32.312	26.012	21.6357	0.602556	0.781921	1.3521	1.94646	0.954235	0.603354	0.784121	1.35586	1.95782	0.956688
1411	340.606	57.3514	43.201	32.306	26.006	21.6505	0.601759	0.781565	1.35161	1.95502	0.954054	0.602651	0.783314	1.35486	1.95822	0.955843
1412	341.16	57.42	43.206	32.308	26.01	21.74	0.600042	0.782621	1.35424	1.99742	0.956166	0.602465	0.78269	1.35426	1.9624	0.955673
1413	342.477	57.3625	43.208	32.308	26.013	21.6575	0.604892	0.785499	1.36012	1.96578	0.959186	0.601815	0.782312	1.35412	1.96278	0.955131
1414	340.41	57.3881	43.205	32.304	26.007	21.6829	0.600029	0.780686	1.35148	1.96808	0.953391	0.601839	0.7823	1.35451	1.96336	0.955225
1415	341.393	57.38	43.204	32.301	26.006	21.6457	0.602061	0.782796	1.35581	1.9574	0.955365	0.601565	0.781899	1.35429	1.96261	0.954831
1416	340.745	57.3774	43.212	32.306	26.012	21.6419	0.601367	0.781095	1.35345	1.94931	0.95352	0.602105	0.782301	1.35543	1.95834	0.955215
1417	341.101	57.3614	43.213	32.306	26.012	21.64	0.60272	0.781841	1.35487	1.95049	0.954893	0.602088	0.782358	1.35594	1.96242	0.955529
1418	339.786	57.3724	43.211	32.303	26.011	21.6543	0.599846	0.778753	1.35007	1.94978	0.951299	0.602509	0.782403	1.35643	1.96037	0.95575
1419	342.795	57.4018	43.209	32.298	26.007	21.6514	0.603818	0.785434	1.36224	1.96754	0.958855	0.602484	0.782181	1.35646	1.96303	0.955813
1420	343.092	57.3856	43.203	32.289	25.999	21.6981	0.604778	0.785899	1.36364	1.99432	0.961381	0.602616	0.782526	1.35743	1.96875	0.956482
1421	340.954	57.3414	43.205	32.291	26	21.6371	0.602971	0.781002	1.35493	1.95373	0.954939	0.602408	0.782407	1.35759	1.9692	0.956353
1422	341.122	57.3748	43.206	32.29	26.001	21.6852	0.601892	0.781244	1.35603	1.97603	0.955805	0.603044	0.782636	1.35843	1.97035	0.957011
1423	342.173	57.41	43.207	32.289	26	21.7	0.602291	0.783507	1.36021	1.98938	0.9582	0.602903	0.781837	1.35743	1.97087	0.95653
1424	341.112	57.3932	43.21	32.291	26.002	21.6368	0.601262	0.781006	1.35599	1.9536	0.95399	0.602295	0.780925	1.3562	1.96638	0.95539
1425	340.954	57.3205	43.215	32.292	26.006	21.6523	0.604294	0.780357	1.356	1.95783	0.955904	0.602147	0.780974	1.35665	1.96881	0.955516
1426	340.76	57.3467	43.215	32.291	26.005	21.6833	0.602831	0.779843	1.35523	1.97123	0.955491	0.602279	0.78089	1.35684	1.96319	0.955255
1427	340.649	57.4033	43.222	32.297	26.012	21.6733	0.600523	0.779517	1.35501	1.96287	0.953397	0.602718	0.780526	1.35653	1.96084	0.955219
1428	341.48	57.4045	43.222	32.296	26.01	21.6782	0.601937	0.781347	1.3581	1.97077	0.955821	0.602466	0.780164	1.35627	1.96229	0.954978
1429	341.24	57.38	43.228	32.3	26.015	21.61	0.602812	0.780655	1.35736	1.93666	0.953984	0.602364	0.780086	1.3564	1.96407	0.955007
1430	341.403	57.33	43.231	32.302	26.017	21.6909	0.605367	0.780956	1.35801	1.97293	0.957945	0.602205	0.779856	1.35632	1.9612	0.954641
1431	340.38	57.4264	43.232	32.301	26.017	21.6836	0.599499	0.778474	1.35415	1.96372	0.952306	0.602037	0.779264	1.35559	1.9585	0.954063
1432	341.026	57.3582	43.233	32.3	26.017	21.69	0.603579	0.77981	1.35694	1.97034	0.956108	0.601573	0.778913	1.35539	1.96096	0.953758
1433	340.399	57.3729	43.23	32.295	26.013	21.6514	0.601715	0.778232	1.35466	1.95112	0.952925	0.601532	0.778874	1.35568	1.96411	0.953943
1434	339.148	57.3764	43.23	32.295	26.014	21.6524	0.599353	0.775372	1.34989	1.94394	0.949355	0.601452	0.778988	1.35628	1.96491	0.954056
1435	340.75	57.46	43.231	32.294	26.015	21.73	0.598689	0.778893	1.3567	1.98804	0.95368	0.601742	0.778616	1.35605	1.96438	0.954039
1436	341.434	57.4059	43.239	32.301	26.022	21.6641	0.60252	0.780385	1.35943	1.9587	0.955279	0.601035	0.778016	1.35543	1.96021	0.953046
1437	342.064	57.3814	43.242	32.303	26.025	21.7027	0.604807	0.781753	1.36215	1.97849	0.958735	0.60112	0.777944	1.3557	1.96166	0.953192
1438	339.55	57.35	43.238	32.297	26.021	21.69	0.601527	0.775866	1.35257	1.96	0.952187	0.601154	0.777962	1.35614	1.96585	0.953521
1439	339.501	57.4162	43.238	32.295	26.02	21.6476	0.598633	0.775613	1.3526	1.94117	0.949161	0.601914	0.778229	1.35702	1.96201	0.953984
1440	340.489	57.3686	43.236	32.291	26.016	21.6759	0.602309	0.777726	1.35653	1.9613	0.953944	0.602141	0.778415	1.35778	1.96283	0.95434
1441	339.545	57.3973	43.24	32.294	26.02	21.7182	0.599594	0.775499	1.35298	1.97326	0.951663	0.601769	0.777618	1.35682	1.96567	0.953851
1442	341.912	57.3928	43.241	32.293	26.021	21.6624	0.604007	0.780763	1.36285	1.96113	0.956921	0.601959	0.778151	1.35813	1.96815	0.954478
1443	342.346	57.4014	43.234	32.285	26.014	21.6573	0.604111	0.781684	1.3648	1.96447	0.957771	0.602044	0.778054	1.35834	1.97628	0.954995
1444	339.994	57.3536	43.239	32.288	26.017	21.7636	0.602201	0.776171	1.35542	1.99838	0.955308	0.602119	0.778163	1.35898	1.98088	0.95543
1445	341.526	57.4029	43.24	32.288	26.018	21.7	0.602855	0.779597	1.36175	1.97734	0.956578	0.602593	0.77841	1.3598	1.98058	0.955907
1446	339.545	57.4009	43.235	32.281	26.012	21.7636	0.59923	0.774935	1.35407	1.9981	0.952782	0.602187	0.777705	1.35894	1.98002	0.955247
1447	341.167	57.3844	43.236	32.28	26.013	21.7344	0.602834	0.778493	1.36096	1.99347	0.956989	0.602189	0.777434	1.35881	1.98309	0.955311
1448	340.674	57.3641	43.238	32.28	26.012	21.6914	0.602916	0.777226	1.35878	1.9712	0.954997	0.602568	0.778328	1.36079	1.98049	0.95598
1449	340.062	57.3768	43.235	32.277	26.011	21.6673	0.601164	0.775831	1.35678	1.9572	0.952301	0.601836	0.777844	1.36037	1.98211	0.955378
1450	341.858	57.3818	43.235	32.275	26.009	21.7055	0.604126	0.779786	1.36394	1.98591	0.95822	0.602203	0.777981	1.36106	1.97481	0.955319
1451	343.081	57.4164	43.236	32.274	26.01	21.6786	0.604849	0.782432	1.36926	1.98018	0.959992	0.602156	0.777668	1.36091	1.97736	0.955299
1452	340.413	57.4726	43.235	32.271	26.008	21.7287	0.597736	0.776206	1.35883	1.98872	0.952366	0.602077	0.777512	1.3611	1.97699	0.955192
1453	340.368	57.3736	43.234	32.267	26.005	21.6345	0.601797	0.775891	1.35886	1.94698	0.952368	0.602608	0.778089	1.36257	1.97763	0.955961
1454	340.58	57.3718	43.24	32.272	26.011	21.7777	0.602506	0.776305	1.35993	2.01133	0.956845	0.60217	0.777585	1.36214	1.97877	0.955508
1455	340.567	57.3726	43.238	32.268	26.008	21.683	0.602364	0.776133	1.36009	1.96861	0.954248	0.602202	0.777531	1.36245	1.98272	0.955774
1456	342.268	57.3841	43.238	32.266	26.007	21.645	0.604881	0.779867	1.3671	1.96165	0.957686	0.603165	0.777576	1.36291	1.97939	0.95626
1457	340.717	57.4045	43.233	32.26	26.001	21.7291	0.601059	0.776263	1.36091	1.99394	0.955047	0.602949	0.777209	1.36263	1.98717	0.956404
1458	343.291	57.419	43.235	32.261	26.003	21.7286	0.605069	0.782055	1.37141	2.00784	0.96186	0.602827	0.776944	1.36256	1.98129	0.95588
1459	340.891	57.3336	43.235	32.26	26.003	21.6668	0.604476	0.776518	1.36204	1.96539	0.955766	0.602774	0.776706	1.36257	1.98219	0.955811
1460	339.55	57.3782	43.237	32.26	26.004	21.7627	0.600285	0.77332	1.3569	2.00146	0.953377	0.602158	0.775839	1.36146	1.98635	0.955203
1461	340.14	57.3686	43.235	32.255	26	21.6838	0.601653	0.774454	1.35947	1.97014	0.95318	0.602243	0.775975	1.36212	1.98486	0.955303
1462	340.207	57.3633	43.235	32.253	26	21.6933	0.601994	0.774464	1.36017	1.97488	0.953761	0.601534	0.774622	1.36015	1.98408	0.954056
1463	339.945	57.3848	43.234	32.251	25.999	21.73	0.600573	0.773797	1.35934	1.99077	0.953432	0.600856	0.77432	1.36008	1.98731	0.953695
1464	341.479	57.4182	43.229	32.245	25.993	21.6891	0.601654	0.777219	1.36548	1.98354	0.955745	0.600931	0.774783	1.36136	1.98542	0.953967
1465	339.474	57.3614	43.219	32.234	25.983	21.7445	0.600101	0.772585	1.35768	2.00234	0.953127	0.600992	0.775303	1.3628	1.98799	0.954528
1466	340.334	57.4109	43.224	32.237	25.988	21.7082	0.599732	0.774401	1.36155	1.98801	0.953243	0.601355	0.775671	1.36392	1.98814	0.955041
1467	341.344	57.4234	43.22	32.231	25.983	21.691	0.600812	0.776559	1.36581	1.98827	0.955279	0.601809	0.776361	1.36563	1.98604	0.955676
1468	342.114	57.4255	43.22	32.228	25.983	21.6809	0.602081	0.778097	1.36955	1.98807	0.957107	0.601598	0.775982	1.3655	1.98654	0.955413
1469	341.68	57.35	43.22	32.227	25.983	21.66	0.604529	0.77704	1.36803	1.97594	0.957355	0.602139	0.776449	1.36686	1.98192	0.95583
1470	342.44	57.3967	43.217	32.222	25.979	21.6467	0.603752	0.778627	1.3713	1.97607	0.957874	0.602521	0.776614	1.36764	1.97891	0.956054
1471	340.716	57.4062	43.214	32.217	25.975	21.6883	0.600182	0.774566	1.36461	1.98704	0.953908	0.603222	0.776847	1.36858	1.97756	0.95662
1472	341.346	57.3442	43.213	32.214	25.972	21.6403	0.603887	0.775857	1.36713	1.97003	0.956046	0.603111	0.776575	1.36851	1.98375	0.956788
1473	341.275	57.37	43.207	32.206	25.965	21.6273	0.602407	0.775555	1.36707	1.96692	0.954812	0.603541	0.77681	1.36936	1.98517	0.957335
1474	342.495	57.345	43.209	32.206	25.967	21.64	0.605714	0.778185	1.3724	1.97882	0.959235	0.602993	0.775869	1.36815	1.98694	0.956587
1475	341.649	57.4104	43.206	32.202	25.963	21.7584	0.601309	0.776193	1.36901	2.0314	0.958289	0.60336	0.775912	1.36868	1.98642	0.956869
1476	342.84	57.3127	43.205	32.198	25.96	21.6441	0.607539	0.778685	1.374	1.98591	0.961179	0.602806	0.775495	1.36842	1.98792	0.956419
1477	339.944	57.3674	43.201	32.193	25.957	21.683	0.599913	0.772038	1.36283	1.98846	0.952642	0.602424	0.775431	1.36874	1.99206	0.956433
1478	341.253	57.36	43.206	32.196	25.961	21.6596	0.60275	0.77487	1.3683	1.98338	0.955879	0.601632	0.774693	1.36781	1.99408	0.955658
1479	340.462	57.3877	43.202	32.19	25.956	21.6585	0.600009	0.772934	1.36534	1.98056	0.952895	0.602289	0.775095	1.36894	1.99064	0.956169
1480	341.451	57.4364	43.203	32.19	25.956	21.6791	0.599737	0.775109	1.36931	1.9959	0.954913	0.601382	0.77454	1.36836	1.99522	0.955579
1481	340.593	57.3944	43.207	32.192	25.958	21.6856	0.600168	0.77302	1.36587	1.99298	0.953806	0.601258	0.774549	1.3687	1.99638	0.955612
1482	343.292	57.3704	43.206	32.189	25.956	21.6804	0.605906	0.779005	1.37691	2.00727	0.961872	0.600678	0.773918	1.36794	1.99896	0.955061
1483	341.501	57.41	43.209	32.19	25.958	21.7273	0.601192	0.7748	1.36995	2.01798	0.957048	0.600786	0.773809	1.36808	2.00185	0.955272
1484	340.375	57.4109	43.206	32.185	25.952	21.69	0.599044	0.772104	1.36521	1.99657	0.952872	0.601128	0.77369	1.36825	2.00286	0.95552
1485	339.709	57.3986	43.213	32.19	25.959	21.7157	0.598687	0.770454	1.36298	2.00145	0.952022	0.600951	0.773223	1.36784	2.00198	0.955131
1486	340.497	57.3882	43.219	32.195	25.965	21.7105	0.600771	0.772173	1.36636	2.00079	0.954369	0.601078	0.773196	1.36812	2.00116	0.955187
1487	341.515	57.3995	43.22	32.193	25.963	21.7005	0.602126	0.77427	1.37045	2.003	0.956649	0.601274	0.772938	1.36799	1.99433	0.954804
1488	339.615	57.4018	43.226	32.196	25.967	21.6936	0.598934	0.769754	1.36304	1.98682	0.951086	0.601488	0.772612	1.36781	1.99279	0.954705
1489	343.613	57.38	43.223	32.193	25.963	21.671	0.606791	0.778816	1.37887	2.00149	0.962261	0.602463	0.773401	1.36954	1.99153	0.955759
1490	341.108	57.3774	43.225	32.193	25.964	21.6357	0.602563	0.772997	1.36903	1.9702	0.95437	0.60288	0.773788	1.37055	1.9911	0.956268
1491	339.736	57.3709	43.228	32.195	25.968	21.6909	0.600542	0.769819	1.36396	1.98579	0.952176	0.602377	0.773321	1.37001	1.99045	0.955669
1492	342.455	57.37	43.231	32.198	25.972	21.6755	0.605516	0.77598	1.3751	1.99262	0.959406	0.602463	0.773109	1.36994	1.99148	0.955693
1493	342.034	57.3903	43.226	32.191	25.965	21.6848	0.603688	0.774884	1.37341	1.99778	0.95793	0.601711	0.771906	1.36816	1.99149	0.954543
1494	340.35	57.4414	43.227	32.191	25.965	21.7073	0.598603	0.771	1.36665	1.99843	0.952453	0.602139	0.772236	1.36914	1.99704	0.955378
1495	339.175	57.3682	43.225	32.188	25.965	21.7127	0.599538	0.768268	1.36259	1.99408	0.951257	0.602433	0.772158	1.36937	1.99514	0.95545
1496	340.175	57.36	43.222	32.183	25.959	21.71	0.601526	0.770394	1.36638	2.0015	0.954208	0.601914	0.771877	1.36928	1.99635	0.955074
1497	342.436	57.3632	43.226	32.184	25.962	21.7009	0.60556	0.775304	1.37591	2.00909	0.96022	0.601334	0.770988	1.36808	1.99281	0.954021
1498	339.804	57.3264	43.229	32.186	25.965	21.6582	0.602601	0.769274	1.36555	1.97247	0.95268	0.601443	0.770711	1.36805	1.99092	0.953872
1499	341.96	57.4277	43.224	32.179	25.959	21.6868	0.601883	0.774014	1.37444	2.00108	0.956773	0.601231	0.771048	1.36902	1.99129	0.954006
1500	339.625	57.3848	43.225	32.179	25.959	21.6557	0.599629	0.76866	1.36505	1.97303	0.950554	0.60108	0.771045	1.36943	1.98951	0.953857
1501	339.864	57.405	43.229	32.181	25.963	21.683	0.599365	0.769062	1.36645	1.98519	0.951414	0.600241	0.770161	1.36822	1.98919	0.952825
1502	340.587	57.4683	43.231	32.182	25.964	21.6996	0.598055	0.770627	1.36936	1.99667	0.952192	0.600483	0.770448	1.36912	1.99045	0.953269
1503	340.503	57.4067	43.23	32.18	25.963	21.6833	0.600464	0.77037	1.36924	1.98908	0.953168	0.600742	0.770244	1.36909	1.99144	0.953407
1504	340.011	57.4065	43.232	32.18	25.964	21.7283	0.599687	0.769116	1.36748	2.0068	0.952992	0.601672	0.770895	1.3706	1.99204	0.954457
1505	341.032	57.3427	43.234	32.18	25.965	21.6619	0.604295	0.771287	1.37181	1.98133	0.955787	0.601866	0.770825	1.37076	1.98818	0.954347
1506	341.637	57.3886	43.241	32.186	25.971	21.7176	0.603702	0.772584	1.37424	2.00803	0.957745	0.60255	0.77078	1.37102	1.98438	0.954572
1507	341.98	57.3419	43.237	32.18	25.965	21.641	0.606136	0.77322	1.37562	1.9772	0.9579	0.602797	0.770532	1.37088	1.98188	0.95447
1508	339.925	57.3855	43.239	32.182	25.968	21.6282	0.600724	0.768573	1.36758	1.95817	0.950644	0.603116	0.770481	1.3711	1.9796	0.95455
1509	340.754	57.3631	43.232	32.173	25.96	21.6359	0.602844	0.770309	1.37113	1.97007	0.953765	0.602933	0.770318	1.37111	1.97651	0.954192
1510	340.044	57.3509	43.234	32.174	25.961	21.6491	0.602192	0.768634	1.36827	1.97154	0.952455	0.602982	0.770143	1.37114	1.97313	0.953964
1511	340.131	57.3619	43.235	32.174	25.963	21.6919	0.601921	0.768763	1.36907	1.99089	0.95355	0.60243	0.769794	1.37085	1.97531	0.953577
1512	340.773	57.3609	43.233	32.171	25.961	21.6136	0.603013	0.770143	1.37187	1.95965	0.953283	0.602171	0.769379	1.3705	1.97989	0.953478
1513	341.404	57.3639	43.234	32.169	25.959	21.6578	0.604045	0.77136	1.37441	1.98436	0.95615	0.601181	0.76847	1.36931	1.98353	0.952572
1514	341.147	57.3908	43.23	32.165	25.956	21.6756	0.602274	0.77078	1.3736	1.9925	0.955188	0.60045	0.767824	1.36859	1.98378	0.951792
1515	338.943	57.3805	43.232	32.165	25.958	21.7005	0.598905	0.765662	1.36517	1.99025	0.949953	0.600126	0.767957	1.36921	1.98496	0.951781
1516	338.247	57.4152	43.225	32.156	25.951	21.7135	0.595915	0.76395	1.3628	1.99554	0.947423	0.599991	0.767896	1.36943	1.99119	0.952062
1517	338.347	57.3929	43.226	32.156	25.951	21.6643	0.597075	0.764108	1.3632	1.97323	0.946993	0.599343	0.767095	1.3684	1.98884	0.951087
1518	340.82	57.435	43.226	32.156	25.952	21.69	0.599655	0.769693	1.37339	1.99918	0.953476	0.59954	0.767293	1.36911	1.99134	0.951515
1519	340.895	57.3882	43.233	32.161	25.956	21.7018	0.602067	0.769722	1.37347	2.00329	0.955252	0.59996	0.767826	1.37044	1.99031	0.952086
1520	339.227	57.38	43.234	32.159	25.956	21.6465	0.599511	0.76575	1.36719	1.96789	0.949324	0.600842	0.768464	1.37192	1.98536	0.952779
1521	342.101	57.4	43.232	32.156	25.952	21.697	0.603651	0.772167	1.37855	2.00997	0.958184	0.601811	0.769656	1.37433	1.99123	0.954472
1522	340.933	57.39	43.228	32.15	25.949	21.6509	0.601844	0.769391	1.37451	1.98305	0.953949	0.602171	0.769335	1.3741	1.99038	0.954499
1523	340.532	57.3725	43.233	32.154	25.954	21.6125	0.602094	0.768419	1.37311	1.96092	0.952272	0.602308	0.769448	1.37467	1.99061	0.954711
1524	342.318	57.4073	43.235	32.156	25.955	21.7064	0.603852	0.772448	1.38009	2.01428	0.95885	0.602369	0.769534	1.37514	1.99565	0.955128
1525	340.193	57.3605	43.237	32.155	25.955	21.6882	0.602177	0.767444	1.37174	1.99325	0.953661	0.601902	0.76878	1.37417	1.99314	0.954284
1526	341.556	57.4	43.24	32.158	25.959	21.7	0.603029	0.770519	1.37746	2.00491	0.956739	0.601586	0.768298	1.37362	1.99523	0.953954
1527	339.769	57.3945	43.236	32.152	25.954	21.7136	0.599936	0.76635	1.37048	2.00318	0.952243	0.601686	0.768238	1.37388	2.00044	0.954327
1528	340.037	57.3991	43.24	32.155	25.958	21.6913	0.600384	0.766884	1.37178	1.99239	0.952274	0.601483	0.767741	1.37345	1.99852	0.953845
1529	339.715	57.3956	43.232	32.145	25.949	21.6976	0.599627	0.766021	1.3707	1.99766	0.951635	0.601071	0.767695	1.37373	2.00571	0.954004
1530	340.652	57.359	43.231	32.142	25.948	21.6843	0.602795	0.767996	1.37493	1.99739	0.954883	0.600902	0.767461	1.37369	2.00797	0.95393
1531	341.115	57.3827	43.227	32.137	25.944	21.6818	0.602434	0.768971	1.37702	2.00083	0.955481	0.601395	0.768292	1.37563	2.00751	0.954767
1532	340.297	57.4278	43.232	32.142	25.949	21.7861	0.59929	0.767125	1.37371	2.04362	0.95477	0.601953	0.768539	1.3765	2.00792	0.955342
1533	341.106	57.3961	43.227	32.136	25.944	21.7239	0.601848	0.768879	1.3772	2.02073	0.956223	0.602326	0.768786	1.37736	2.0086	0.955814
1534	342.688	57.4245	43.226	32.131	25.941	21.6573	0.603385	0.772167	1.38404	1.99994	0.958104	0.602771	0.769225	1.37851	2.0118	0.956584
1535	341.11	57.335	43.223	32.128	25.939	21.665	0.604291	0.768612	1.37789	1.99526	0.956294	0.602502	0.768708	1.37797	2.00774	0.955917
1536	340.82	57.37	43.222	32.124	25.935	21.68	0.602241	0.767751	1.37672	2.00247	0.954945	0.602531	0.768529	1.37805	2.002	0.955558
1537	342.323	57.3524	43.228	32.129	25.941	21.7038	0.605907	0.771067	1.38301	2.01975	0.96027	0.602568	0.768227	1.37788	2.00108	0.955392
1538	339.847	57.3782	43.231	32.13	25.943	21.6355	0.600556	0.765352	1.37323	1.97239	0.950814	0.601634	0.7669	1.37584	2.00095	0.954038
1539	340.11	57.4164	43.233	32.131	25.944	21.7	0.599488	0.765876	1.37429	2.00348	0.952253	0.601042	0.766555	1.37554	2.00155	0.953532
1540	340.534	57.3671	43.228	32.125	25.938	21.7114	0.602113	0.766762	1.37601	2.01425	0.955062	0.600738	0.766109	1.37508	2.00275	0.953179
1541	338.872	57.4294	43.235	32.13	25.945	21.7071	0.596843	0.762881	1.36973	1.99905	0.94863	0.599513	0.764734	1.37298	1.99649	0.951269
1542	340.374	57.4127	43.234	32.128	25.943	21.6873	0.600148	0.766193	1.3758	1.9995	0.952748	0.599747	0.764871	1.37351	1.99724	0.951575
1543	339.74	57.3852	43.232	32.124	25.94	21.7161	0.600111	0.764629	1.37346	2.01081	0.952476	0.599816	0.764721	1.37358	1.99717	0.951566
1544	338.355	57.394	43.233	32.124	25.942	21.661	0.597336	0.761443	1.36831	1.97591	0.946898	0.599714	0.764456	1.37347	1.99486	0.951254
1545	340.549	57.37	43.232	32.122	25.939	21.6341	0.602187	0.766312	1.37696	1.9777	0.952961	0.599447	0.763803	1.37258	1.99325	0.950636
1546	339.951	57.3932	43.228	32.116	25.934	21.6909	0.599977	0.764829	1.37476	2.00297	0.952184	0.599071	0.763123	1.37174	1.99347	0.950048
1547	340.015	57.3605	43.226	32.113	25.932	21.6777	0.601394	0.764904	1.37524	1.99808	0.952884	0.599067	0.763073	1.37197	1.99365	0.950063
1548	337.115	57.3882	43.223	32.109	25.928	21.6882	0.594972	0.758313	1.36352	1.98779	0.944301	0.599213	0.763239	1.37262	1.998	0.950545
1549	338.595	57.3917	43.225	32.108	25.929	21.6987	0.59752	0.761434	1.36994	2.00103	0.948632	0.599188	0.763276	1.37309	2.00423	0.950955
1550	339.919	57.3874	43.226	32.107	25.927	21.7035	0.60008	0.764274	1.37508	2.01206	0.952582	0.598764	0.76294	1.37287	2.00574	0.950615
1551	339.206	57.3973	43.225	32.105	25.928	21.7014	0.598363	0.762604	1.37286	2.00636	0.950267	0.598919	0.763105	1.37356	2.00883	0.951033
1552	341.033	57.3882	43.226	32.104	25.927	21.7091	0.602013	0.766572	1.38025	2.02134	0.955834	0.599729	0.763919	1.37537	2.00844	0.952052
1553	339.241	57.4269	43.221	32.098	25.922	21.71	0.597007	0.762476	1.37322	2.01354	0.949805	0.600029	0.764142	1.3761	2.00717	0.952343
1554	340.867	57.3764	43.232	32.108	25.933	21.7136	0.602479	0.766063	1.38003	2.01966	0.955808	0.600163	0.76433	1.37678	2.00445	0.952428
1555	339.983	57.3859	43.235	32.11	25.934	21.6523	0.600638	0.764007	1.37623	1.98508	0.951437	0.600438	0.764367	1.37719	2.00199	0.952525
1556	339.625	57.395	43.235	32.107	25.932	21.67	0.59962	0.762996	1.375	1.99217	0.950665	0.600636	0.764471	1.37771	2.0009	0.952691
1557	340.779	57.4141	43.239	32.111	25.937	21.6623	0.601017	0.765589	1.3799	1.99299	0.95318	0.600111	0.763948	1.37707	2.00098	0.952083
1558	339.629	57.3813	43.237	32.107	25.935	21.6665	0.600292	0.762868	1.37568	1.98917	0.950947	0.599888	0.763454	1.3765	1.99904	0.951574
1559	341.661	57.3857	43.23	32.098	25.926	21.6843	0.603398	0.767296	1.38392	2.0137	0.956997	0.60045	0.76395	1.37782	2.00093	0.952384
1560	337.916	57.4742	43.236	32.103	25.931	21.7367	0.593328	0.758816	1.36875	2.01412	0.94555	0.600521	0.763747	1.37783	2.00084	0.952346
1561	339.665	57.365	43.234	32.099	25.928	21.695	0.600922	0.762607	1.37605	2.00605	0.952243	0.600593	0.763603	1.37799	2.00069	0.952346
1562	341.866	57.3727	43.236	32.1	25.931	21.6541	0.60457	0.767479	1.38542	1.99832	0.957108	0.600525	0.76351	1.37814	1.99929	0.952205
1563	339.267	57.3664	43.233	32.096	25.928	21.6691	0.600118	0.761577	1.37511	1.99152	0.950401	0.600003	0.762467	1.37658	1.99407	0.950987
1564	340.665	57.3944	43.236	32.097	25.93	21.6544	0.601523	0.764578	1.381	1.99194	0.953176	0.600976	0.76269	1.37733	1.99301	0.951719
1565	339.614	57.39	43.235	32.096	25.929	21.6395	0.599813	0.762219	1.37674	1.97935	0.949957	0.600846	0.762649	1.37759	1.99266	0.951633
1566	338.683	57.3527	43.235	32.094	25.927	21.6445	0.599747	0.759992	1.37296	1.97715	0.948474	0.599527	0.761427	1.37568	1.9926	0.950098
1567	338.887	57.353	43.236	32.094	25.928	21.7061	0.600138	0.760382	1.37401	2.00671	0.950676	0.599039	0.760907	1.37501	1.99283	0.949521
1568	339.78	57.4022	43.245	32.102	25.937	21.6974	0.600013	0.762316	1.37786	2.0036	0.951636	0.598997	0.760569	1.37465	1.99324	0.949344
1569	338.3	57.4483	43.242	32.098	25.934	21.7009	0.595337	0.75893	1.37208	1.99793	0.946364	0.599129	0.760414	1.37469	1.99611	0.949535
1570	337.886	57.3955	43.239	32.094	25.93	21.6918	0.5967	0.757933	1.3704	1.99311	0.946364	0.599364	0.760424	1.37501	2.00084	0.949993
1571	339.824	57.3673	43.237	32.091	25.928	21.6691	0.601233	0.76221	1.37848	1.99478	0.951935	0.59922	0.760447	1.3754	2	0.94991
1572	339.405	57.3645	43.24	32.092	25.93	21.6864	0.600735	0.761133	1.37701	1.99949	0.951294	0.599154	0.760327	1.37553	1.99942	0.949805
1573	338.959	57.3266	43.236	32.087	25.925	21.7097	0.601395	0.760067	1.3752	2.01027	0.951681	0.59968	0.760759	1.37666	2.00313	0.950647
1574	339.23	57.3922	43.237	32.086	25.926	21.6874	0.599128	0.760538	1.37675	2.00084	0.950098	0.600198	0.761461	1.3783	2.008	0.951715
1575	339.68	57.402	43.238	32.086	25.927	21.68	0.599548	0.761478	1.3788	1.99953	0.950899	0.600065	0.761376	1.37852	2.00942	0.951704
1576	339.922	57.4245	43.238	32.085	25.927	21.7282	0.599021	0.761952	1.38	2.02391	0.952259	0.599908	0.761259	1.37861	2.00808	0.951495
1577	340.383	57.4159	43.241	32.086	25.928	21.7303	0.600325	0.762847	1.38187	2.0272	0.953836	0.5994	0.761415	1.37919	2.01176	0.951509
1578	339.864	57.3968	43.243	32.087	25.93	21.6916	0.600305	0.761617	1.37999	2.00467	0.951861	0.599856	0.761621	1.37985	2.01333	0.952043
1579	339.284	57.3844	43.239	32.083	25.926	21.664	0.599637	0.760317	1.37764	1.99017	0.949833	0.599627	0.76136	1.37967	2.01471	0.951854
1580	339.69	57.44	43.235	32.078	25.921	21.75	0.597835	0.761159	1.37928	2.03602	0.951779	0.599454	0.760908	1.37914	2.01082	0.951287
1581	340.087	57.3507	43.235	32.077	25.922	21.6959	0.602321	0.76198	1.38134	2.01181	0.953831	0.600396	0.761514	1.38054	2.01144	0.952319
1582	339.107	57.41	43.232	32.072	25.918	21.6986	0.597946	0.759649	1.37759	2.0092	0.949576	0.60056	0.761354	1.38059	2.01126	0.952355
1583	338.783	57.4036	43.236	32.074	25.92	21.6782	0.597811	0.758786	1.37627	1.99668	0.948295	0.600237	0.760918	1.38013	2.0118	0.951957
1584	342.52	57.35	43.241	32.078	25.925	21.71	0.606918	0.767088	1.39168	2.03155	0.961055	0.601021	0.761289	1.38121	2.00766	0.952494
1585	339.671	57.3527	43.234	32.068	25.916	21.6773	0.601455	0.760503	1.38033	2.00338	0.952114	0.600164	0.760409	1.38	2.00766	0.951467
1586	338.223	57.3867	43.232	32.066	25.914	21.6733	0.597371	0.757262	1.37444	1.99393	0.947051	0.600102	0.760451	1.38037	2.01062	0.951653
1587	341.215	57.3709	43.232	32.063	25.912	21.6618	0.603325	0.763754	1.38683	2.00706	0.95554	0.599886	0.759949	1.37976	2.01008	0.951217
1588	337.731	57.3959	43.237	32.066	25.916	21.7191	0.596322	0.755821	1.37289	2.01178	0.94664	0.599042	0.758961	1.37829	2.005	0.949841
1589	339.575	57.4418	43.234	32.063	25.912	21.73	0.597514	0.759947	1.38016	2.02998	0.950874	0.598589	0.758558	1.37786	2.00665	0.949439
1590	337.514	57.3864	43.236	32.064	25.914	21.68	0.596297	0.755267	1.37201	1.99288	0.945247	0.598865	0.758952	1.37892	2.00942	0.950047
1591	339.769	57.3682	43.235	32.061	25.912	21.6564	0.601013	0.760178	1.3814	1.99599	0.951419	0.598193	0.758476	1.37834	2.00941	0.949369
1592	338.711	57.3895	43.236	32.06	25.912	21.7095	0.598281	0.757676	1.37732	2.01495	0.949303	0.599322	0.759603	1.38066	2.01028	0.950845
1593	339.76	57.4141	43.241	32.065	25.918	21.6991	0.599305	0.760021	1.38181	2.01332	0.951309	0.600932	0.76092	1.38342	2.00889	0.952625
1594	339.999	57.4364	43.237	32.059	25.912	21.6768	0.598617	0.76042	1.38278	2.00699	0.950793	0.601571	0.76163	1.38509	2.01105	0.953624
1595	341.501	57.3657	43.236	32.057	25.911	21.68	0.604226	0.763712	1.38912	2.01785	0.95697	0.601884	0.761822	1.38581	2.01268	0.954073
1596	343.94	57.36	43.236	32.057	25.913	21.6568	0.608786	0.769165	1.3995	2.02024	0.963332	0.60185	0.761623	1.38583	2.00885	0.95376
1597	340.008	57.3809	43.232	32.051	25.908	21.6748	0.600769	0.760236	1.38372	2.00798	0.952241	0.601551	0.761136	1.38536	2.00783	0.953268
1598	340.615	57.3468	43.23	32.048	25.906	21.6641	0.603207	0.761524	1.38642	2.00744	0.954564	0.601685	0.761085	1.38563	2.00601	0.953262
1599	338.299	57.37	43.228	32.045	25.905	21.651	0.59804	0.75628	1.37744	1.98811	0.947112	0.600897	0.760513	1.38501	2.007	0.952524
1600	338.509	57.4055	43.235	32.05	25.911	21.6927	0.597209	0.756614	1.37852	2.00621	0.947867	0.599459	0.758975	1.38259	2.0048	0.950608
1601	340.084	57.4036	43.223	32.037	25.897	21.6336	0.599556	0.760065	1.38471	1.99422	0.950751	0.598908	0.758505	1.38214	2.0069	0.950139
1602	339.983	57.4164	43.22	32.032	25.894	21.6964	0.598714	0.759704	1.38475	2.02485	0.951799	0.597175	0.757347	1.38045	2.00832	0.948471
1603	339.401	57.385	43.213	32.025	25.888	21.6557	0.598717	0.758403	1.3826	2.00483	0.949923	0.596804	0.75712	1.38042	2.01408	0.948465
1604	338.839	57.4064	43.215	32.024	25.888	21.7	0.59691	0.756945	1.38054	2.02268	0.948959	0.596709	0.757015	1.38059	2.01329	0.948341
1605	337.321	57.4773	43.21	32.017	25.882	21.7018	0.591075	0.753419	1.37458	2.01738	0.942884	0.596059	0.756317	1.37974	2.0201	0.947932
1606	337.919	57.3926	43.205	32.011	25.877	21.7122	0.595447	0.754687	1.37724	2.02841	0.94707	0.595425	0.755632	1.37891	2.02134	0.947231
1607	338.484	57.3972	43.212	32.017	25.884	21.6544	0.596544	0.755881	1.37976	2.00068	0.946998	0.595122	0.755075	1.37828	2.0225	0.946812
1608	338.23	57.4171	43.206	32.009	25.876	21.7348	0.595009	0.755181	1.37873	2.04184	0.947892	0.595273	0.754839	1.37825	2.01958	0.946649
1609	338.167	57.43	43.204	32.005	25.874	21.7167	0.594277	0.754905	1.37892	2.03356	0.946893	0.596113	0.755398	1.37966	2.01941	0.947557
1610	337.989	57.3723	43.209	32.01	25.879	21.6814	0.596593	0.754506	1.3782	2.01297	0.946988	0.595996	0.755486	1.38023	2.01467	0.947322
1611	338.46	57.3514	43.201	31.998	25.868	21.6419	0.597969	0.75529	1.38034	2.00221	0.947816	0.596533	0.756003	1.38156	2.01821	0.948217
1612	339.408	57.4152	43.201	31.997	25.868	21.6595	0.596951	0.757337	1.38444	2.01622	0.949242	0.597227	0.756708	1.38321	2.01685	0.949055
1613	338.556	57.4309	43.197	31.991	25.863	21.6209	0.59463	0.755302	1.38119	1.99522	0.945424	0.597844	0.756823	1.38374	2.01615	0.949515
1614	340.498	57.3764	43.196	31.988	25.86	21.6573	0.600299	0.759498	1.38911	2.02546	0.953267	0.597904	0.75733	1.38509	2.01752	0.949987
1615	340.776	57.4041	43.202	31.994	25.866	21.6741	0.599871	0.760118	1.39024	2.03234	0.953754	0.597749	0.757701	1.38609	2.02214	0.950407
1616	338.86	57.3552	43.203	31.993	25.866	21.69	0.598598	0.755709	1.38265	2.02862	0.950113	0.597592	0.757143	1.38535	2.02517	0.950168
1617	339.973	57.4374	43.201	31.989	25.864	21.6617	0.597014	0.758056	1.38765	2.02256	0.950292	0.59841	0.75782	1.38688	2.03335	0.951582
1618	339.897	57.4314	43.195	31.983	25.858	21.6814	0.596879	0.757887	1.38734	2.03455	0.950761	0.597779	0.757127	1.38596	2.03337	0.950804
1619	337.928	57.3744	43.196	31.983	25.858	21.7116	0.59585	0.753429	1.3793	2.03748	0.947564	0.597763	0.75672	1.38564	2.03702	0.950793
1620	340.955	57.39	43.192	31.977	25.853	21.7	0.600357	0.760042	1.39188	2.05246	0.955324	0.597192	0.756338	1.38529	2.03703	0.950241
1621	338.596	57.4036	43.198	31.981	25.859	21.68	0.595883	0.754649	1.3827	2.02558	0.94782	0.597114	0.755867	1.38472	2.03799	0.949992
1622	339.831	57.3624	43.197	31.978	25.857	21.7286	0.599756	0.757267	1.38797	2.05787	0.953676	0.597187	0.755445	1.38426	2.03404	0.949601
1623	337.933	57.4064	43.198	31.979	25.858	21.6936	0.594602	0.753037	1.38022	2.02872	0.946253	0.596688	0.755241	1.38428	2.03552	0.949284
1624	338.767	57.3929	43.194	31.973	25.852	21.6786	0.596469	0.754761	1.38363	2.02931	0.948548	0.596138	0.754523	1.38328	2.03526	0.948521
1625	338.842	57.372	43.192	31.971	25.851	21.63	0.597394	0.754928	1.38416	2.00688	0.948022	0.596797	0.755272	1.38495	2.03919	0.949643
1626	337.56	57.4376	43.191	31.969	25.851	21.73	0.592352	0.752004	1.37937	2.0478	0.945344	0.596352	0.754877	1.38451	2.0365	0.949009
1627	338.911	57.3889	43.185	31.963	25.845	21.7133	0.596511	0.755015	1.38489	2.05069	0.949981	0.596229	0.755011	1.38517	2.03364	0.948904
1628	341.13	57.385	43.183	31.96	25.844	21.69	0.600496	0.75989	1.39442	2.05302	0.95568	0.595981	0.754621	1.3848	2.03604	0.948679
1629	338.743	57.3827	43.189	31.965	25.85	21.6968	0.596642	0.754505	1.38488	2.03906	0.949234	0.595928	0.754699	1.38529	2.04139	0.949027
1630	338.565	57.4436	43.188	31.962	25.85	21.6364	0.593738	0.753974	1.38484	2.00874	0.945519	0.59641	0.754845	1.3859	2.0406	0.949421
1631	337.69	57.38	43.185	31.959	25.846	21.72	0.594734	0.752027	1.38103	2.04611	0.946971	0.595949	0.754423	1.38558	2.03848	0.948809
1632	339.239	57.3964	43.191	31.965	25.853	21.7044	0.597024	0.755476	1.38759	2.0443	0.950462	0.595852	0.754082	1.38526	2.03655	0.94847
1633	338.17	57.3845	43.193	31.966	25.856	21.7164	0.595725	0.753029	1.38368	2.04227	0.948101	0.595303	0.753623	1.38473	2.0339	0.947736
1634	337.854	57.4236	43.187	31.956	25.847	21.6982	0.593282	0.752056	1.38261	2.03584	0.945694	0.595131	0.753089	1.38401	2.03863	0.947588
1635	340.301	57.3755	43.192	31.961	25.85	21.6786	0.59982	0.757504	1.39217	2.03951	0.953309	0.595427	0.753289	1.3847	2.03932	0.947973
1636	337.573	57.4245	43.188	31.955	25.845	21.6683	0.592796	0.751298	1.38123	2.02056	0.944097	0.594703	0.752286	1.3832	2.0407	0.947014
1637	337.154	57.41	43.185	31.95	25.841	21.7129	0.592538	0.750232	1.37974	2.0418	0.944485	0.594976	0.752718	1.38429	2.04351	0.947637
1638	338.65	57.37	43.184	31.947	25.838	21.71	0.596803	0.753426	1.38587	2.05093	0.949663	0.595416	0.753053	1.38514	2.04516	0.948238
1639	336.506	57.3936	43.182	31.942	25.833	21.7373	0.591955	0.748456	1.37709	2.05401	0.943747	0.595645	0.753348	1.38605	2.05084	0.948912
1640	339.922	57.4024	43.183	31.943	25.835	21.7136	0.597638	0.756054	1.3913	2.06193	0.952461	0.596076	0.753363	1.38638	2.05146	0.949263
1641	339.21	57.405	43.185	31.944	25.837	21.695	0.596361	0.754404	1.38861	2.04738	0.949902	0.596363	0.753499	1.38697	2.05366	0.949686
1642	341.623	57.3895	43.189	31.945	25.838	21.7305	0.601427	0.759567	1.39849	2.07925	0.958026	0.596088	0.753265	1.38689	2.05045	0.949236
1643	337.92	57.37	43.191	31.948	25.842	21.67	0.595811	0.751401	1.38356	2.02493	0.946555	0.596523	0.753749	1.38807	2.04888	0.949759
1644	337.885	57.3986	43.191	31.946	25.842	21.7359	0.594547	0.751188	1.38387	2.05722	0.947444	0.596265	0.752865	1.38673	2.04588	0.948926
1645	338.243	57.4027	43.188	31.94	25.836	21.6673	0.594881	0.751784	1.38533	2.02845	0.946519	0.595838	0.752458	1.38632	2.04577	0.948439
1646	338.241	57.4018	43.19	31.943	25.839	21.7	0.594999	0.751847	1.38532	2.04301	0.947405	0.595544	0.751877	1.38555	2.03828	0.947528
1647	337.41	57.3432	43.186	31.937	25.833	21.7	0.595828	0.749866	1.38192	2.04095	0.946631	0.595026	0.751508	1.38523	2.04311	0.947274
1648	338.23	57.4333	43.183	31.932	25.83	21.6983	0.593372	0.751555	1.38573	2.04657	0.946495	0.59529	0.751503	1.38552	2.03506	0.947036
1649	340.035	57.37	43.187	31.935	25.833	21.6388	0.599371	0.755499	1.39313	2.02684	0.951649	0.594633	0.750912	1.3847	2.03495	0.946283
1650	337.087	57.4127	43.182	31.928	25.827	21.7336	0.592182	0.748817	1.38128	2.05874	0.944775	0.594819	0.750909	1.38495	2.03464	0.946412
1651	338.169	57.3614	43.186	31.931	25.831	21.6057	0.596399	0.751152	1.38594	2.00086	0.945775	0.594883	0.751162	1.38564	2.03691	0.946755
1652	336.62	57.4418	43.185	31.929	25.829	21.6786	0.59028	0.747647	1.37959	2.02766	0.941249	0.594879	0.750689	1.38496	2.03309	0.946279
1653	338.502	57.3757	43.184	31.928	25.827	21.6804	0.596305	0.751826	1.38708	2.04086	0.948312	0.594109	0.749567	1.38315	2.03207	0.945081
1654	338.477	57.3714	43.18	31.922	25.82	21.7059	0.596273	0.751636	1.38675	2.05681	0.949033	0.594194	0.749329	1.38291	2.02774	0.944781
1655	337.01	57.3836	43.184	31.924	25.823	21.6518	0.593342	0.748245	1.38096	2.01987	0.943164	0.593481	0.748744	1.38204	2.03267	0.944267
1656	336.77	57.3582	43.184	31.923	25.824	21.6555	0.593985	0.747647	1.38043	2.01971	0.943261	0.594305	0.749188	1.38309	2.03401	0.945161
1657	336.576	57.38	43.185	31.923	25.824	21.6757	0.592772	0.747149	1.37963	2.0284	0.942676	0.594143	0.748798	1.3827	2.03449	0.944883
1658	336.566	57.4123	43.185	31.922	25.824	21.69	0.59141	0.747061	1.37982	2.03535	0.942174	0.593796	0.748567	1.38262	2.03332	0.9445
1659	338.26	57.3767	43.189	31.925	25.828	21.6767	0.596046	0.750755	1.38699	2.03706	0.947507	0.593368	0.747988	1.38188	2.03474	0.943989
1660	337.543	57.3673	43.189	31.924	25.828	21.7	0.595176	0.749096	1.38428	2.04423	0.946365	0.59334	0.748118	1.38238	2.03602	0.94415
1661	338.019	57.4181	43.188	31.921	25.825	21.7	0.593842	0.750019	1.38623	2.0486	0.94635	0.593437	0.748322	1.38306	2.03117	0.944105
1662	335.42	57.3914	43.187	31.919	25.824	21.6929	0.590344	0.744187	1.3758	2.02983	0.939589	0.593649	0.748726	1.38412	2.03385	0.944668
1663	337.39	57.3919	43.187	31.919	25.824	21.6662	0.593791	0.748558	1.38388	2.02865	0.94439	0.593383	0.748386	1.38378	2.03239	0.944246
1664	337.46	57.4	43.184	31.914	25.82	21.59	0.593451	0.74858	1.38439	1.99444	0.942362	0.593207	0.748475	1.38424	2.03111	0.944153
1665	338.109	57.4367	43.18	31.908	25.815	21.7	0.592896	0.749886	1.38728	2.05412	0.946111	0.59304	0.748295	1.38414	2.03032	0.943922
1666	337.457	57.3833	43.185	31.912	25.819	21.6567	0.594184	0.748374	1.38461	2.02685	0.944551	0.593281	0.748537	1.38484	2.02989	0.94423
1667	338.095	57.41	43.179	31.905	25.813	21.66	0.593941	0.749723	1.38745	2.03525	0.94572	0.592941	0.74826	1.38468	2.02851	0.943811
1668	337.69	57.4255	43.181	31.906	25.813	21.6809	0.59267	0.748759	1.38557	2.0431	0.944733	0.592507	0.748143	1.38473	2.03873	0.944046
1669	336.39	57.3868	43.182	31.907	25.816	21.6668	0.592036	0.745877	1.38069	2.02685	0.941743	0.591741	0.747101	1.38311	2.0375	0.94289
1670	336.785	57.4155	43.179	31.902	25.813	21.6427	0.591412	0.746618	1.38276	2.01896	0.941456	0.591576	0.747411	1.38397	2.03936	0.943109
1671	337.33	57.4638	43.18	31.902	25.812	21.73	0.590409	0.747761	1.38477	2.06596	0.94401	0.591335	0.747243	1.38391	2.04063	0.942951
1672	335.06	57.44	43.183	31.903	25.815	21.72	0.587536	0.742598	1.3759	2.04554	0.938018	0.590902	0.746834	1.38349	2.04231	0.942552
1673	338.646	57.463	43.187	31.907	25.819	21.6687	0.593031	0.750544	1.39063	2.03988	0.946087	0.590469	0.746421	1.38304	2.04641	0.942278
1674	337.774	57.446	43.188	31.907	25.819	21.688	0.592253	0.748546	1.38705	2.04414	0.944611	0.591232	0.746734	1.38381	2.04402	0.942841
1675	336.637	57.4661	43.193	31.91	25.823	21.7274	0.589635	0.745893	1.3826	2.05486	0.941938	0.591288	0.746684	1.38402	2.03747	0.942532
1676	335.355	57.43	43.196	31.912	25.826	21.7473	0.589004	0.742989	1.37757	2.05552	0.939826	0.591511	0.746809	1.38445	2.03453	0.942617
1677	337.98	57.35	43.191	31.907	25.82	21.6	0.596758	0.748804	1.38812	2.00225	0.945399	0.591697	0.746737	1.3846	2.0373	0.942874
1678	337.413	57.4689	43.191	31.905	25.82	21.6443	0.590794	0.747415	1.38625	2.02009	0.941846	0.592161	0.746858	1.38513	2.03836	0.943334
1679	335.632	57.4355	43.192	31.906	25.821	21.6773	0.589098	0.743469	1.37893	2.02494	0.938615	0.592849	0.747142	1.38594	2.03759	0.943938
1680	338.63	57.435	43.191	31.904	25.821	21.71	0.594338	0.750044	1.39171	2.05929	0.94788	0.593639	0.748251	1.38824	2.03814	0.945179
1681	338.395	57.3973	43.191	31.902	25.819	21.6955	0.595502	0.74939	1.39074	2.0516	0.947836	0.592963	0.747777	1.38771	2.04857	0.945061
1682	337.744	57.3962	43.192	31.902	25.82	21.7	0.594446	0.747883	1.38829	2.04942	0.946163	0.593224	0.747555	1.38753	2.05191	0.945298
1683	339.039	57.4505	43.194	31.904	25.822	21.7062	0.594535	0.750751	1.39362	2.05937	0.948513	0.593715	0.748256	1.38915	2.06033	0.946522
1684	336.691	57.4167	43.199	31.908	25.828	21.772	0.592029	0.745485	1.38442	2.07526	0.944575	0.593202	0.74726	1.38755	2.05442	0.945297
1685	336.89	57.4009	43.189	31.897	25.816	21.6945	0.592619	0.74586	1.38501	2.04351	0.943501	0.592454	0.746586	1.38657	2.05513	0.944476
1686	338.059	57.4542	43.191	31.898	25.819	21.7633	0.592539	0.748382	1.39027	2.08387	0.947188	0.592171	0.746362	1.38639	2.05522	0.94419
1687	335.69	57.3973	43.191	31.897	25.818	21.6591	0.590743	0.743072	1.38053	2.0179	0.939304	0.591709	0.74573	1.38552	2.05389	0.943473
1688	336.442	57.4355	43.186	31.891	25.813	21.7232	0.590271	0.74467	1.38385	2.05658	0.94209	0.591466	0.745546	1.38543	2.04833	0.942943
1689	337.216	57.4145	43.185	31.889	25.811	21.6986	0.592458	0.746318	1.38704	2.05002	0.944163	0.591465	0.745338	1.3854	2.04895	0.942888
1690	337.278	57.45	43.19	31.892	25.815	21.702	0.591302	0.746323	1.38752	2.05008	0.943489	0.591717	0.74522	1.38544	2.04354	0.94272
1691	336.378	57.4364	43.191	31.891	25.814	21.6844	0.590327	0.744199	1.38382	2.03638	0.940865	0.592717	0.74641	1.38794	2.0505	0.944493
1692	336.501	57.3896	43.194	31.893	25.818	21.71	0.592615	0.744405	1.38478	2.04784	0.943118	0.593562	0.747176	1.38962	2.04916	0.945459
1693	337.953	57.4174	43.201	31.899	25.823	21.6935	0.594303	0.747552	1.39053	2.04596	0.946015	0.593447	0.746967	1.38949	2.04802	0.945227
1694	339.725	57.4027	43.194	31.891	25.816	21.7064	0.597741	0.751405	1.39805	2.06664	0.951709	0.593699	0.746569	1.38895	2.04358	0.944927
1695	339.134	57.4139	43.193	31.889	25.814	21.6726	0.596189	0.750031	1.39561	2.04722	0.948857	0.593858	0.746349	1.38881	2.04308	0.944896
1696	336.824	57.4223	43.19	31.885	25.81	21.6864	0.591655	0.744855	1.38611	2.04203	0.942536	0.593449	0.745849	1.38805	2.04532	0.944466
1697	336.256	57.3655	43.191	31.885	25.81	21.6464	0.593068	0.743535	1.38377	2.01901	0.941391	0.593164	0.745202	1.3871	2.04111	0.943689
1698	335.919	57.3943	43.195	31.887	25.814	21.6829	0.591436	0.742657	1.38284	2.03284	0.940647	0.59286	0.744635	1.38632	2.03614	0.942913
1699	335.099	57.4	43.195	31.888	25.815	21.7552	0.589755	0.740909	1.37946	2.06351	0.940105	0.592168	0.743629	1.38461	2.03661	0.941899
1700	336.112	57.3845	43.198	31.889	25.817	21.65	0.592307	0.743018	1.38386	2.01651	0.94058	0.592105	0.743152	1.38398	2.03542	0.941531
1701	338.173	57.3964	43.202	31.891	25.82	21.6591	0.595611	0.747442	1.39257	2.03184	0.946275	0.591936	0.743021	1.384	2.0379	0.941508
1702	336.127	57.4123	43.202	31.892	25.819	21.7209	0.591346	0.742987	1.3837	2.05051	0.941761	0.591967	0.743567	1.38519	2.04018	0.942005
1703	335.522	57.3938	43.206	31.894	25.823	21.6985	0.591213	0.741517	1.38166	2.03369	0.939958	0.591855	0.743485	1.38527	2.03258	0.941507
1704	336.019	57.3918	43.199	31.887	25.817	21.6918	0.591882	0.742616	1.38393	2.03639	0.94123	0.591724	0.743741	1.38597	2.03954	0.941979
1705	337.827	57.4736	43.199	31.885	25.814	21.6918	0.591657	0.746481	1.39115	2.04884	0.944131	0.591183	0.74298	1.38477	2.03848	0.941137
1706	335.075	57.425	43.202	31.887	25.817	21.65	0.588967	0.740334	1.38005	2.01029	0.936618	0.591282	0.742988	1.38511	2.04025	0.941334
1707	337.13	57.4475	43.196	31.88	25.811	21.73	0.591394	0.744808	1.38874	2.06524	0.943879	0.591275	0.743512	1.38631	2.04224	0.941784
1708	335.972	57.3873	43.195	31.877	25.809	21.66	0.591822	0.742118	1.3842	2.02441	0.940379	0.590887	0.743071	1.38569	2.03888	0.94111
1709	336.42	57.41	43.204	31.885	25.817	21.74	0.592039	0.743043	1.38604	2.06291	0.943146	0.590419	0.742123	1.38414	2.03304	0.939941
1710	337.39	57.47	43.202	31.883	25.815	21.6957	0.591166	0.745185	1.39004	2.04762	0.943108	0.59076	0.742064	1.38427	2.03435	0.940219
1711	334.858	57.418	43.209	31.889	25.821	21.662	0.589165	0.739527	1.37961	2.01285	0.936509	0.590638	0.741293	1.38303	2.02822	0.939365
1712	335.03	57.4433	43.208	31.887	25.819	21.6476	0.588378	0.739843	1.38032	2.00791	0.935951	0.591041	0.741581	1.38372	2.0294	0.939878
1713	335.127	57.3777	43.21	31.887	25.82	21.6714	0.591356	0.739925	1.38094	2.0195	0.938563	0.590756	0.74114	1.38309	2.02298	0.939106
1714	334.924	57.3877	43.209	31.885	25.818	21.6777	0.590539	0.739411	1.3801	2.02235	0.937899	0.59074	0.7406	1.38229	2.02317	0.938796
1715	337.033	57.3826	43.213	31.89	25.824	21.6787	0.594641	0.744135	1.38903	2.03262	0.943968	0.591226	0.741172	1.38361	2.02514	0.939592
1716	335.229	57.4115	43.208	31.882	25.816	21.663	0.590047	0.739954	1.38159	2.01797	0.937742	0.592692	0.742346	1.38609	2.03287	0.94169
1717	335.915	57.4164	43.208	31.881	25.815	21.7164	0.591052	0.741404	1.38442	2.04895	0.94094	0.593585	0.743549	1.38857	2.04161	0.943491
1718	336.939	57.4282	43.213	31.884	25.819	21.6627	0.592569	0.743532	1.38887	2.02669	0.94208	0.59428	0.744338	1.39024	2.04253	0.944487
1719	339.02	57.37	43.212	31.882	25.818	21.7077	0.598638	0.748059	1.39768	2.06203	0.950642	0.594372	0.744624	1.39101	2.04094	0.944663
1720	339.182	57.3991	43.21	31.879	25.815	21.7396	0.597608	0.748349	1.39834	2.08065	0.951166	0.594269	0.744471	1.39093	2.0424	0.944605
1721	337.633	57.3886	43.212	31.881	25.816	21.6555	0.595404	0.744932	1.39173	2.02878	0.944873	0.594384	0.744826	1.39183	2.03966	0.944779
1722	338.24	57.42	43.215	31.882	25.818	21.635	0.595283	0.74614	1.39446	2.02152	0.945201	0.593721	0.743737	1.38998	2.03849	0.943646
1723	334.978	57.4182	43.208	31.874	25.81	21.6809	0.589328	0.738879	1.38101	2.02816	0.937336	0.592554	0.742574	1.38796	2.03565	0.942056
1724	337.281	57.4568	43.21	31.875	25.812	21.6579	0.591855	0.743893	1.39074	2.02979	0.942154	0.591898	0.741852	1.38675	2.03566	0.941209
1725	333.688	57.399	43.21	31.874	25.811	21.6781	0.587933	0.735904	1.37592	2.01848	0.934152	0.591276	0.741268	1.38593	2.0356	0.940484
1726	335.539	57.4145	43.208	31.871	25.808	21.7005	0.590465	0.739919	1.38355	2.04221	0.939513	0.591008	0.7404	1.38448	2.03695	0.939872
1727	337.07	57.42	43.21	31.873	25.81	21.76	0.593015	0.743296	1.38986	2.08068	0.945233	0.591535	0.740663	1.38521	2.03162	0.940103
1728	336.017	57.4256	43.213	31.874	25.813	21.6715	0.591057	0.740844	1.38598	2.02834	0.939801	0.591084	0.739598	1.3834	2.03124	0.939161
1729	335.663	57.3514	43.21	31.871	25.809	21.6773	0.593407	0.740063	1.38429	2.03101	0.940916	0.591229	0.739707	1.38384	2.03353	0.939469
1730	336.05	57.38	43.213	31.871	25.81	21.59	0.593015	0.74072	1.38612	1.99082	0.938949	0.591039	0.739681	1.38402	2.03661	0.93952
1731	334.107	57.4064	43.218	31.876	25.815	21.6945	0.588699	0.736438	1.3781	2.02713	0.935565	0.590662	0.739064	1.38313	2.02963	0.938564
1732	334.27	57.4064	43.217	31.873	25.813	21.7056	0.588942	0.736666	1.379	2.03456	0.936308	0.591136	0.739057	1.38331	2.0295	0.938872
1733	335.664	57.4628	43.219	31.875	25.815	21.7488	0.58914	0.739738	1.38475	2.06374	0.939866	0.591255	0.739624	1.38461	2.02915	0.939306
1734	335.349	57.4186	43.218	31.873	25.814	21.6877	0.590377	0.73898	1.38368	2.03179	0.938541	0.591146	0.739657	1.3848	2.03724	0.939713
1735	336.203	57.3582	43.217	31.871	25.812	21.6664	0.594368	0.740796	1.3872	2.02745	0.94196	0.591586	0.740213	1.38601	2.03973	0.940487
1736	337.7	57.4262	43.219	31.872	25.813	21.6512	0.594242	0.744028	1.39338	2.02854	0.943954	0.592143	0.740971	1.38759	2.04093	0.94139
1737	336.334	57.4182	43.221	31.873	25.813	21.7064	0.592254	0.740954	1.38752	2.0475	0.941799	0.592538	0.741169	1.38818	2.04133	0.941809
1738	336.049	57.4145	43.218	31.87	25.811	21.7018	0.591779	0.740326	1.38657	2.0445	0.940977	0.59262	0.74088	1.38782	2.04256	0.941769
1739	336.828	57.42	43.216	31.867	25.809	21.6873	0.59284	0.741978	1.39001	2.043	0.942632	0.592631	0.741035	1.38833	2.04417	0.941984
1740	336.499	57.4295	43.217	31.866	25.809	21.7382	0.591904	0.741121	1.38888	2.06653	0.942801	0.592538	0.740306	1.38726	2.04083	0.941325
1741	334.638	57.3767	43.22	31.868	25.811	21.7108	0.590955	0.736959	1.3812	2.04039	0.93826	0.59223	0.73973	1.38648	2.03283	0.940378
1742	336.901	57.3938	43.225	31.872	25.816	21.6848	0.594441	0.741876	1.39077	2.03874	0.943461	0.592416	0.739781	1.38689	2.03372	0.940611
1743	335.592	57.36	43.226	31.872	25.818	21.6338	0.59359	0.738929	1.38583	2.00512	0.939344	0.592218	0.739436	1.3865	2.03545	0.940392
1744	334.682	57.405	43.226	31.872	25.818	21.6167	0.590101	0.736925	1.38207	1.99152	0.93517	0.592113	0.738869	1.38564	2.02919	0.939666
1745	336.417	57.4088	43.228	31.873	25.82	21.7188	0.593083	0.740679	1.38946	2.05074	0.942607	0.592122	0.738977	1.38612	2.02487	0.93954
1746	335.939	57.4227	43.223	31.867	25.813	21.7264	0.591453	0.739563	1.38726	2.05511	0.941102	0.591172	0.738065	1.38472	2.02609	0.938474
1747	334.872	57.3805	43.219	31.862	25.808	21.669	0.591168	0.73715	1.38286	2.02269	0.937718	0.591018	0.738264	1.38531	2.03118	0.938801
1748	335.189	57.4024	43.224	31.865	25.813	21.6443	0.591021	0.737717	1.38462	2.01015	0.937379	0.591107	0.738525	1.386	2.03611	0.939309
1749	334.238	57.4379	43.222	31.861	25.81	21.7286	0.587791	0.735494	1.38092	2.04731	0.935997	0.590945	0.737839	1.38492	2.03495	0.938743
1750	336.432	57.4223	43.227	31.866	25.815	21.6936	0.592507	0.740322	1.38998	2.04078	0.941631	0.590589	0.7371	1.3838	2.02624	0.937625
1751	335.748	57.4362	43.227	31.865	25.813	21.67	0.590723	0.738752	1.38693	2.026	0.93873	0.589937	0.736433	1.38282	2.0246	0.936743
1752	334.471	57.3548	43.229	31.866	25.815	21.7213	0.591951	0.735877	1.38188	2.0426	0.938642	0.589713	0.736062	1.38231	2.02945	0.936653
1753	333.825	57.3991	43.229	31.865	25.815	21.63	0.58896	0.73439	1.37944	1.99417	0.933277	0.590292	0.736357	1.38305	2.02886	0.937192
1754	332.985	57.4173	43.226	31.861	25.811	21.6718	0.586603	0.73248	1.37597	2.01118	0.931546	0.591557	0.737283	1.38493	2.03001	0.93864
1755	334.215	57.4027	43.228	31.862	25.812	21.7245	0.589455	0.735119	1.38105	2.04415	0.936748	0.592333	0.737848	1.38624	2.02744	0.939367
1756	335.383	57.3959	43.229	31.861	25.812	21.7082	0.591843	0.73756	1.38611	2.04312	0.939772	0.592362	0.738238	1.3872	2.03056	0.939818
1757	339.555	57.3491	43.233	31.866	25.816	21.6727	0.601362	0.746801	1.40312	2.04884	0.951766	0.592756	0.738537	1.38795	2.0345	0.940485
1758	337.753	57.3958	43.232	31.863	25.815	21.61	0.596156	0.742705	1.39613	2.00804	0.943818	0.593769	0.739536	1.38996	2.03837	0.941966
1759	335.92	57.41	43.228	31.858	25.81	21.7421	0.592158	0.73861	1.38856	2.06444	0.941797	0.594164	0.739931	1.39092	2.03873	0.942505
1760	334.981	57.38	43.227	31.856	25.808	21.6657	0.591715	0.736482	1.38468	2.02172	0.937948	0.594411	0.739928	1.39109	2.03665	0.942567
1761	336.343	57.3962	43.233	31.862	25.813	21.6876	0.593693	0.739476	1.39008	2.03826	0.941912	0.592962	0.738666	1.38899	2.03544	0.940838
1762	335.676	57.4023	43.232	31.859	25.812	21.7118	0.592219	0.73788	1.38778	2.04672	0.940521	0.592321	0.738201	1.38838	2.04187	0.940524
1763	335.553	57.3668	43.234	31.86	25.813	21.6776	0.593571	0.737544	1.38727	2.02854	0.940208	0.591784	0.737726	1.38777	2.03698	0.939664
1764	335.716	57.4239	43.228	31.855	25.81	21.6965	0.59122	0.737967	1.3884	2.04034	0.93966	0.591866	0.738141	1.38881	2.04047	0.94019
1765	336.389	57.4355	43.222	31.849	25.807	21.7109	0.591674	0.739447	1.39188	2.05311	0.941619	0.591399	0.737766	1.38853	2.04224	0.939805
1766	334.496	57.4352	43.223	31.85	25.809	21.69	0.588394	0.735285	1.38427	2.0302	0.935777	0.591672	0.738006	1.38932	2.03886	0.939983
1767	336.305	57.415	43.22	31.849	25.809	21.7	0.592295	0.739392	1.39199	2.04615	0.941635	0.591593	0.738104	1.38987	2.04002	0.940098
1768	335.265	57.41	43.214	31.839	25.801	21.7136	0.590421	0.736845	1.38814	2.05062	0.939212	0.591739	0.73813	1.39022	2.03874	0.940173
1769	336.561	57.3839	43.222	31.845	25.806	21.647	0.59413	0.739564	1.39328	2.02307	0.941773	0.592002	0.737939	1.39016	2.03423	0.940014
1770	335.983	57.3872	43.223	31.845	25.807	21.6828	0.593015	0.73823	1.39112	2.03666	0.941013	0.59262	0.73795	1.39053	2.03465	0.940472
1771	335.917	57.4068	43.227	31.85	25.812	21.6779	0.592247	0.73815	1.39085	2.03136	0.940184	0.592889	0.738034	1.39117	2.03032	0.940516
1772	335.897	57.3767	43.228	31.851	25.816	21.6621	0.593514	0.738106	1.39145	2.02157	0.940504	0.593365	0.738494	1.3925	2.02842	0.941054
1773	334.619	57.3408	43.227	31.851	25.819	21.7044	0.592716	0.735361	1.38685	2.03312	0.93898	0.593282	0.738715	1.39343	2.02996	0.94128
1774	336.723	57.3875	43.22	31.844	25.816	21.64	0.594181	0.739984	1.39649	2.01582	0.941947	0.593422	0.738787	1.39415	2.02476	0.941198
1775	336.728	57.4	43.222	31.847	25.823	21.691	0.59375	0.740061	1.39744	2.03733	0.942978	0.593537	0.739011	1.39522	2.02468	0.941478
1776	337.177	57.4177	43.216	31.842	25.82	21.6755	0.59355	0.741114	1.39977	2.03386	0.943357	0.593203	0.739132	1.39607	2.02495	0.941428
1777	336.094	57.3614	43.216	31.842	25.824	21.6233	0.593997	0.738733	1.3962	2.00024	0.940436	0.592669	0.739055	1.39655	2.02283	0.941002
1778	336.544	57.4	43.213	31.839	25.822	21.679	0.59305	0.739722	1.3983	2.03082	0.942147	0.592347	0.738566	1.39622	2.02029	0.940424
1779	336.161	57.4207	43.205	31.832	25.818	21.6646	0.591179	0.738946	1.39741	2.02343	0.940152	0.591983	0.738322	1.39627	2.01683	0.939916
1780	334.316	57.3936	43.203	31.829	25.817	21.6759	0.588974	0.734826	1.3902	2.01829	0.935996	0.591449	0.737747	1.39568	2.01949	0.939418
1781	335.105	57.3582	43.205	31.831	25.822	21.6291	0.591926	0.73656	1.39418	1.99805	0.937906	0.591024	0.737655	1.39595	2.02383	0.939381
1782	335.921	57.4089	43.204	31.83	25.822	21.6504	0.591207	0.738353	1.39781	2.01313	0.939416	0.59059	0.737229	1.39565	2.0239	0.938903
1783	335.347	57.4223	43.208	31.834	25.827	21.7423	0.589807	0.737092	1.39565	2.05245	0.939875	0.590421	0.736578	1.39487	2.02323	0.938408
1784	335.77	57.4059	43.203	31.83	25.826	21.6923	0.591024	0.738087	1.39811	2.03068	0.940174	0.590521	0.736549	1.39503	2.02306	0.938468
1785	335.247	57.4	43.195	31.819	25.816	21.69	0.590015	0.736741	1.39616	2.03131	0.938803	0.590346	0.736177	1.39431	2.0259	0.93828
1786	334.411	57.3711	43.201	31.817	25.811	21.6696	0.589994	0.734389	1.39199	2.01872	0.936688	0.590231	0.735582	1.39304	2.02728	0.937897
1787	334.636	57.4014	43.214	31.826	25.813	21.6655	0.589672	0.734624	1.3913	2.01707	0.936414	0.590194	0.734898	1.39152	2.02382	0.937239
1788	334.448	57.3836	43.229	31.837	25.818	21.6745	0.590704	0.733954	1.38914	2.01793	0.936591	0.590669	0.734722	1.39074	2.0202	0.937182
1789	334.613	57.4039	43.235	31.841	25.818	21.6826	0.5904	0.734186	1.3889	2.02284	0.936731	0.591375	0.734772	1.39021	2.01956	0.937552
1790	333.843	57.4047	43.248	31.851	25.825	21.71	0.589548	0.732305	1.38501	2.02821	0.935272	0.592926	0.73601	1.39189	2.01994	0.939239
1791	335.919	57.3908	43.261	31.864	25.834	21.6461	0.594345	0.736858	1.3927	2.00531	0.939774	0.593865	0.736653	1.39255	2.0188	0.940103
1792	336.024	57.3886	43.269	31.872	25.839	21.6944	0.594961	0.73709	1.39244	2.02686	0.941397	0.594887	0.73763	1.39401	2.01842	0.941286
1793	338.804	57.3709	43.274	31.875	25.841	21.6506	0.60085	0.743056	1.40373	2.02133	0.948493	0.595053	0.737405	1.39334	2.01417	0.940991
1794	336.982	57.4093	43.28	31.882	25.847	21.6538	0.596245	0.739125	1.39595	2.0091	0.942461	0.59481	0.737	1.39239	2.01211	0.940455
1795	337.801	57.4084	43.283	31.883	25.848	21.6575	0.597861	0.740792	1.39934	2.01526	0.944873	0.594704	0.736596	1.39156	2.01484	0.940278
1796	334.1	57.4005	43.281	31.88	25.846	21.6553	0.591558	0.732611	1.38424	1.99308	0.93467	0.594835	0.737041	1.39249	2.01648	0.940735
1797	332.666	57.4215	43.274	31.873	25.839	21.7092	0.587852	0.729467	1.3783	2.01384	0.931517	0.593662	0.735491	1.38968	2.01692	0.939073
1798	334.749	57.3782	43.28	31.879	25.845	21.7111	0.593602	0.734034	1.38693	2.02441	0.938536	0.593454	0.735255	1.38937	2.02093	0.939029
1799	337.591	57.4456	43.282	31.88	25.847	21.7065	0.595876	0.740201	1.39893	2.03835	0.944597	0.59305	0.734402	1.38789	2.01964	0.938191
1800	333.944	57.3691	43.282	31.88	25.848	21.7239	0.592642	0.732204	1.38405	2.02436	0.936856	0.59395	0.735645	1.39041	2.02782	0.93999
1801	336.348	57.4174	43.28	31.878	25.845	21.7174	0.594785	0.737476	1.39379	2.03719	0.942152	0.594303	0.736182	1.39159	2.02673	0.940507
1802	335.195	57.358	43.275	31.871	25.838	21.6612	0.595036	0.73482	1.38901	2.00628	0.939007	0.594528	0.736529	1.39243	2.02608	0.94085
1803	338.187	57.4197	43.278	31.873	25.842	21.7183	0.597855	0.741312	1.40187	2.05028	0.947266	0.593876	0.735873	1.39135	2.02602	0.940046
1804	334.497	57.4347	43.269	31.864	25.833	21.6647	0.590327	0.733224	1.38657	2.00621	0.935132	0.593893	0.736134	1.39201	2.02772	0.94033
1805	336.005	57.3817	43.268	31.862	25.831	21.6723	0.595176	0.736465	1.39282	2.01989	0.940942	0.594126	0.735907	1.39184	2.02222	0.940064
1806	335.642	57.4576	43.267	31.86	25.829	21.7116	0.591311	0.735606	1.39132	2.03794	0.938964	0.593827	0.735947	1.3921	2.02688	0.940174
1807	334.956	57.3969	43.27	31.862	25.832	21.7195	0.592761	0.734037	1.38871	2.03623	0.938847	0.592477	0.73448	1.38951	2.01819	0.937966
1808	335.828	57.3438	43.267	31.858	25.829	21.6285	0.596419	0.735883	1.39255	1.99874	0.94029	0.592713	0.7345	1.38978	2.02195	0.938355
1809	335.471	57.4133	43.269	31.86	25.83	21.7165	0.592943	0.735101	1.39084	2.03885	0.939779	0.592047	0.733802	1.38874	2.02208	0.937541
1810	333.706	57.4374	43.259	31.847	25.818	21.6246	0.588405	0.731043	1.38375	1.98949	0.931807	0.591955	0.733488	1.38836	2.02235	0.937326
1811	334.794	57.3999	43.261	31.848	25.82	21.702	0.591973	0.733362	1.3885	2.0325	0.937853	0.592291	0.733963	1.38955	2.02051	0.937768
1812	334.011	57.3987	43.258	31.844	25.817	21.6849	0.590516	0.731583	1.38548	2.02083	0.935245	0.592287	0.734327	1.39044	2.03111	0.938585
1813	334.844	57.4363	43.264	31.85	25.822	21.7181	0.590667	0.733406	1.3887	2.03981	0.937462	0.592903	0.73506	1.39212	2.03081	0.939446
1814	336.739	57.4139	43.268	31.851	25.825	21.6643	0.595117	0.737363	1.39703	2.02336	0.941939	0.59325	0.735302	1.39285	2.03243	0.939934
1815	337.226	57.4022	43.266	31.849	25.822	21.755	0.596385	0.738429	1.39881	2.07292	0.946007	0.593656	0.735379	1.39322	2.03085	0.940176
1816	338.08	57.4183	43.267	31.849	25.823	21.6733	0.597258	0.740235	1.40259	2.03678	0.94581	0.593614	0.735586	1.39383	2.0336	0.94045
1817	334.715	57.4217	43.259	31.839	25.814	21.6317	0.590837	0.732738	1.38886	2.0008	0.935219	0.594288	0.736173	1.39523	2.03177	0.941175
1818	335.245	57.3524	43.262	31.842	25.817	21.6709	0.594812	0.733898	1.39106	2.02147	0.93955	0.593599	0.735472	1.39414	2.03324	0.94041
1819	334.879	57.4434	43.259	31.838	25.814	21.7102	0.590224	0.733034	1.38977	2.04005	0.937165	0.593006	0.734888	1.39328	2.0258	0.939307
1820	336.925	57.4015	43.254	31.833	25.81	21.6546	0.595381	0.737513	1.39849	2.02705	0.942532	0.592332	0.734162	1.39215	2.02133	0.938217
1821	334.674	57.43	43.256	31.833	25.811	21.6967	0.590296	0.732457	1.38938	2.03359	0.936589	0.592147	0.733978	1.392	2.02308	0.938104
1822	335.506	57.4147	43.252	31.83	25.808	21.6574	0.592236	0.734342	1.39283	2.02083	0.938288	0.59208	0.734471	1.39322	2.02525	0.938519
1823	335.936	57.4216	43.248	31.824	25.802	21.6144	0.592538	0.735154	1.39462	2.00555	0.93818	0.592181	0.734303	1.39312	2.02295	0.938382
1824	334.244	57.4189	43.245	31.821	25.8	21.6489	0.589543	0.731452	1.38783	2.013	0.934428	0.591985	0.73377	1.39235	2.0245	0.938035
1825	337.025	57.4224	43.246	31.819	25.799	21.6621	0.594341	0.737344	1.39961	2.03669	0.942455	0.592319	0.733774	1.39258	2.02503	0.938301
1826	334.548	57.4023	43.249	31.821	25.8	21.6677	0.590935	0.731861	1.38909	2.02396	0.936201	0.592604	0.73406	1.39343	2.03123	0.939023
1827	335.453	57.3633	43.245	31.816	25.796	21.6808	0.594004	0.733777	1.39308	2.03791	0.940106	0.593821	0.735392	1.39622	2.03872	0.941051
1828	334.951	57.3728	43.243	31.811	25.791	21.6807	0.592633	0.732486	1.39099	2.03726	0.938447	0.595449	0.736763	1.39918	2.0454	0.943326
1829	336.717	57.412	43.246	31.814	25.796	21.718	0.594237	0.736348	1.39879	2.06425	0.943347	0.594968	0.735824	1.39761	2.04728	0.942561
1830	340.463	57.41	43.249	31.816	25.797	21.6611	0.601058	0.744475	1.41412	2.05797	0.952373	0.595657	0.736507	1.39918	2.04801	0.94349
1831	338.957	57.3443	43.243	31.808	25.792	21.678	0.600933	0.741051	1.40856	2.05976	0.950356	0.594911	0.735768	1.39806	2.04623	0.942497
1832	334.224	57.3837	43.245	31.811	25.794	21.7177	0.590976	0.730769	1.38867	2.04981	0.937097	0.594453	0.73569	1.39817	2.04531	0.94214
1833	336.913	57.38	43.242	31.808	25.792	21.641	0.595758	0.736648	1.40007	2.02911	0.942705	0.59388	0.734901	1.39687	2.04089	0.941076
1834	333.291	57.3937	43.242	31.806	25.791	21.6772	0.588783	0.728601	1.38525	2.02543	0.933157	0.592704	0.733488	1.39441	2.0415	0.93951
1835	334.847	57.4423	43.24	31.803	25.788	21.666	0.589423	0.731939	1.39172	2.03083	0.935946	0.590858	0.731966	1.39168	2.04092	0.937384
1836	334.368	57.3967	43.234	31.796	25.781	21.6699	0.590226	0.730828	1.38973	2.03333	0.935903	0.590505	0.731861	1.39167	2.0388	0.937006
1837	336.086	57.405	43.232	31.794	25.779	21.7047	0.592825	0.734581	1.39686	2.06222	0.941407	0.589755	0.730956	1.39017	2.04081	0.936102
1838	334.257	57.4462	43.235	31.794	25.78	21.715	0.588016	0.730394	1.3895	2.05573	0.935478	0.589574	0.730861	1.39016	2.04203	0.936012
1839	334.093	57.4296	43.237	31.796	25.781	21.6765	0.588501	0.730036	1.38858	2.03493	0.934448	0.589863	0.730685	1.39003	2.04085	0.936044
1840	334.221	57.3896	43.24	31.799	25.786	21.6965	0.590512	0.730314	1.38958	2.04319	0.936374	0.589969	0.730772	1.3904	2.03795	0.936032
1841	333.161	57.4167	43.24	31.798	25.785	21.69	0.587516	0.727934	1.38517	2.03395	0.932527	0.589654	0.730181	1.38951	2.03384	0.935275
1842	334.461	57.3794	43.242	31.799	25.787	21.6529	0.591446	0.73071	1.3908	2.02259	0.93617	0.589827	0.730263	1.38984	2.03261	0.935391
1843	334.821	57.4022	43.238	31.794	25.782	21.6238	0.590964	0.731432	1.3923	2.01303	0.935819	0.589972	0.729996	1.38958	2.03485	0.935461
1844	334.369	57.3973	43.244	31.8	25.789	21.6782	0.590621	0.730446	1.39065	2.03346	0.936107	0.589863	0.729939	1.38966	2.03318	0.93529
1845	334.637	57.435	43.237	31.792	25.781	21.6944	0.589232	0.730968	1.39177	2.04715	0.936293	0.589504	0.729465	1.38897	2.03573	0.934923
1846	333.386	57.3831	43.245	31.799	25.789	21.7244	0.589516	0.728171	1.3868	2.05055	0.934935	0.589574	0.729783	1.38975	2.04075	0.935451
1847	334.183	57.4074	43.241	31.795	25.785	21.6726	0.589746	0.729912	1.39011	2.03156	0.935176	0.589126	0.72948	1.38937	2.04676	0.93532
1848	331.787	57.4218	43.243	31.796	25.787	21.7443	0.585007	0.724616	1.38038	2.05176	0.929962	0.589101	0.729716	1.39004	2.04942	0.935617
1849	335.597	57.4088	43.235	31.788	25.779	21.7018	0.591931	0.732938	1.39623	2.05776	0.939863	0.589282	0.729897	1.39064	2.05141	0.935976
1850	333.966	57.4374	43.234	31.786	25.778	21.7153	0.58783	0.729311	1.38967	2.05507	0.934902	0.589358	0.730192	1.39144	2.04598	0.935948
1851	335.271	57.4246	43.229	31.78	25.773	21.6885	0.590448	0.732098	1.39534	2.05207	0.938185	0.589626	0.730163	1.39167	2.04757	0.936215
1852	335.361	57.4283	43.23	31.78	25.774	21.7063	0.590497	0.73223	1.39594	2.06112	0.93881	0.590262	0.73075	1.39304	2.04901	0.937087
1853	334.508	57.41	43.237	31.785	25.779	21.6236	0.590045	0.730239	1.39239	2.0125	0.934736	0.590249	0.730309	1.39245	2.04448	0.936592
1854	334.294	57.3691	43.243	31.79	25.785	21.6937	0.591626	0.729709	1.39173	2.04272	0.937045	0.590049	0.729822	1.39176	2.03657	0.935771
1855	333.872	57.3951	43.235	31.781	25.776	21.7277	0.589458	0.728724	1.38998	2.06181	0.93607	0.589914	0.728963	1.3903	2.03179	0.934914
1856	334.388	57.36	43.235	31.781	25.776	21.65	0.591838	0.72985	1.39212	2.0261	0.9364	0.58964	0.728436	1.38945	2.02865	0.934265
1857	332.639	57.4126	43.232	31.776	25.771	21.6124	0.586434	0.725905	1.38484	1.9997	0.929154	0.589044	0.727812	1.38841	2.03418	0.933808
1858	332.691	57.342	43.233	31.778	25.773	21.6527	0.589501	0.726083	1.38506	2.0186	0.932186	0.589215	0.728253	1.38937	2.03547	0.934273
1859	333.877	57.4145	43.233	31.776	25.771	21.6776	0.588577	0.728543	1.39	2.03911	0.934263	0.588976	0.727963	1.38897	2.03184	0.933769
1860	332.651	57.4297	43.235	31.778	25.774	21.7197	0.585873	0.725869	1.38512	2.05121	0.931535	0.589097	0.728259	1.38974	2.03404	0.934171
1861	335.854	57.4004	43.237	31.779	25.775	21.6828	0.59282	0.732795	1.39846	2.05178	0.940304	0.589583	0.728884	1.39112	2.03919	0.935163
1862	333.087	57.4	43.233	31.774	25.771	21.6818	0.587786	0.726692	1.38717	2.03639	0.932541	0.589653	0.729388	1.39238	2.04265	0.935741
1863	335.516	57.3823	43.23	31.77	25.768	21.6593	0.592689	0.731929	1.39752	2.04149	0.939217	0.589527	0.729031	1.39194	2.03919	0.935281
1864	334.788	57.41	43.22	31.759	25.757	21.6456	0.589831	0.730277	1.39449	2.03574	0.936094	0.589764	0.729225	1.39253	2.03591	0.935406
1865	334.542	57.3937	43.218	31.755	25.755	21.6609	0.589991	0.729613	1.39393	2.04285	0.936233	0.588543	0.728156	1.39074	2.03451	0.933921
1866	332.904	57.3875	43.226	31.763	25.762	21.6314	0.587694	0.726041	1.38687	2.01485	0.931042	0.588711	0.728287	1.39116	2.03523	0.934166
1867	333.477	57.4117	43.222	31.758	25.757	21.6466	0.587534	0.727228	1.38926	2.02825	0.93241	0.587633	0.72759	1.39007	2.03791	0.933215
1868	332.628	57.4534	43.221	31.756	25.756	21.6837	0.584278	0.725311	1.38595	2.04201	0.929914	0.587576	0.727221	1.38955	2.04139	0.93315
1869	333.682	57.389	43.225	31.76	25.759	21.6727	0.588962	0.72761	1.39011	2.04145	0.934256	0.586707	0.726454	1.3882	2.03865	0.931992
1870	333.514	57.4744	43.225	31.757	25.758	21.7109	0.585137	0.727052	1.38987	2.06022	0.932555	0.587303	0.727182	1.38982	2.04498	0.933182
1871	333.807	57.378	43.22	31.752	25.752	21.7011	0.589433	0.727692	1.39086	2.0601	0.935641	0.587539	0.72744	1.39051	2.04931	0.933741
1872	332.225	57.4412	43.217	31.749	25.75	21.6458	0.58391	0.724244	1.3845	2.0237	0.928124	0.587989	0.72758	1.391	2.05203	0.934279
1873	335.445	57.3909	43.222	31.752	25.754	21.6813	0.59187	0.731136	1.39815	2.05912	0.939371	0.587845	0.727473	1.39108	2.05229	0.934167
1874	334.48	57.4135	43.221	31.751	25.753	21.691	0.589184	0.729032	1.39413	2.05859	0.936329	0.587865	0.727175	1.3907	2.0466	0.933718
1875	333.28	57.4089	43.225	31.753	25.756	21.7134	0.587426	0.726291	1.38936	2.06105	0.933675	0.587639	0.727099	1.39084	2.04184	0.933311
1876	333.542	57.4113	43.229	31.757	25.761	21.68	0.587954	0.72686	1.39068	2.04326	0.933472	0.588152	0.727734	1.39232	2.04796	0.934381
1877	332.702	57.4392	43.228	31.755	25.759	21.6422	0.585279	0.724967	1.38718	2.02037	0.92941	0.587355	0.727193	1.39147	2.04877	0.933601
1878	333.709	57.42	43.228	31.755	25.761	21.6447	0.587847	0.727162	1.39185	2.02678	0.932794	0.586521	0.72631	1.38998	2.04656	0.932428
1879	334.44	57.4504	43.219	31.745	25.751	21.7051	0.587504	0.728691	1.3949	2.06652	0.935619	0.586403	0.725931	1.38944	2.04597	0.932105
1880	333.794	57.4513	43.218	31.745	25.751	21.7096	0.586288	0.727346	1.3922	2.06485	0.933905	0.58646	0.725904	1.38956	2.04844	0.93227
1881	331.76	57.4409	43.223	31.749	25.755	21.6955	0.58335	0.722851	1.38372	2.04309	0.928118	0.586862	0.725984	1.38991	2.05521	0.932949
1882	332.151	57.3807	43.225	31.75	25.757	21.72	0.586601	0.72364	1.38558	2.05692	0.931419	0.586558	0.725622	1.38941	2.05397	0.932486
1883	333.57	57.4	43.226	31.75	25.757	21.7099	0.588348	0.726669	1.3915	2.06053	0.934628	0.586855	0.725503	1.38937	2.0513	0.932482
1884	333.076	57.3852	43.226	31.749	25.757	21.73	0.588094	0.72553	1.38967	2.06777	0.934161	0.586526	0.724886	1.38839	2.04966	0.931825
1885	332.692	57.4251	43.225	31.747	25.756	21.6347	0.585721	0.72463	1.3883	2.0181	0.929555	0.587074	0.72552	1.38975	2.05156	0.932685
1886	334.203	57.4011	43.23	31.751	25.76	21.68	0.589585	0.727858	1.3946	2.04781	0.93559	0.586859	0.725743	1.39043	2.05095	0.932686
1887	331.983	57.435	43.223	31.744	25.753	21.7112	0.583985	0.723022	1.38534	2.05342	0.929305	0.586996	0.726083	1.39129	2.05535	0.933234
1888	333.944	57.44	43.222	31.743	25.751	21.6911	0.587185	0.727293	1.39329	2.05637	0.934138	0.586812	0.726044	1.39137	2.05051	0.932861
1889	333.07	57.4484	43.217	31.735	25.746	21.6894	0.585097	0.7252	1.39034	2.05262	0.931428	0.586694	0.726106	1.39166	2.05709	0.933186
1890	334.837	57.4287	43.224	31.742	25.752	21.7494	0.589306	0.729047	1.39748	2.09135	0.938461	0.586077	0.72578	1.3912	2.0526	0.932375
1891	333.098	57.4122	43.221	31.739	25.749	21.6547	0.586804	0.725261	1.39023	2.0339	0.931547	0.586097	0.725879	1.39158	2.05157	0.932418
1892	333.065	57.4582	43.222	31.738	25.749	21.7151	0.584893	0.725063	1.39032	2.06416	0.931831	0.586118	0.72567	1.39143	2.05277	0.93239
1893	333.328	57.4663	43.228	31.743	25.754	21.6212	0.585267	0.725571	1.39142	2.01638	0.929913	0.587035	0.726382	1.39295	2.05447	0.933522
1894	332.448	57.4544	43.226	31.742	25.754	21.6923	0.584129	0.723721	1.38798	2.04621	0.92961	0.587094	0.726437	1.39326	2.05263	0.933524
1895	333.474	57.4185	43.224	31.738	25.75	21.7124	0.587328	0.725826	1.39226	2.06478	0.933938	0.587751	0.727122	1.3948	2.05449	0.93449
1896	335.506	57.3989	43.219	31.732	25.745	21.6823	0.591519	0.730187	1.40098	2.06453	0.939357	0.587591	0.726641	1.39407	2.05409	0.934088
1897	335.188	57.4327	43.223	31.735	25.748	21.7163	0.589717	0.72943	1.39965	2.07847	0.938471	0.587873	0.726517	1.39406	2.05635	0.934333
1898	335.506	57.4005	43.218	31.729	25.742	21.6442	0.591407	0.730058	1.40098	2.04688	0.938313	0.588247	0.726884	1.39495	2.05071	0.934523
1899	331.689	57.4246	43.22	31.73	25.744	21.7214	0.583771	0.721691	1.38527	2.06139	0.929017	0.588366	0.727019	1.39541	2.05202	0.934772
1900	333.076	57.3967	43.217	31.727	25.742	21.6445	0.587242	0.724709	1.3913	2.03218	0.931625	0.587464	0.726091	1.39385	2.04897	0.933486
1901	333.832	57.4369	43.213	31.722	25.736	21.5772	0.586746	0.72629	1.39422	2.00676	0.930938	0.586842	0.725166	1.39231	2.04076	0.932113
1902	334.079	57.4142	43.214	31.722	25.737	21.7098	0.588158	0.726765	1.39549	2.0739	0.935681	0.585806	0.724195	1.3906	2.04237	0.930949
1903	332.725	57.4331	43.219	31.725	25.741	21.6699	0.585204	0.723693	1.39006	2.04319	0.930356	0.585976	0.724131	1.39066	2.0365	0.930733
1904	332.385	57.4157	43.22	31.726	25.743	21.6315	0.585363	0.722952	1.38887	2.02105	0.928859	0.586283	0.724411	1.39141	2.04093	0.931356
1905	332.526	57.45	43.219	31.725	25.74	21.7008	0.584159	0.723261	1.389	2.05814	0.930166	0.585906	0.723767	1.39041	2.04792	0.931107
1906	331.628	57.3951	43.222	31.727	25.744	21.6403	0.584959	0.721245	1.38571	2.02029	0.927506	0.585804	0.723566	1.39026	2.04438	0.93076
1907	334.152	57.3935	43.22	31.724	25.742	21.693	0.589395	0.726671	1.39649	2.06316	0.935986	0.585574	0.72339	1.39009	2.0402	0.930305
1908	331.935	57.431	43.224	31.727	25.745	21.7083	0.584102	0.721785	1.38722	2.05571	0.929196	0.58562	0.723222	1.38993	2.04459	0.930476
1909	333.604	57.4242	43.227	31.729	25.748	21.6779	0.587446	0.725353	1.39443	2.04911	0.933255	0.586397	0.723805	1.39132	2.04549	0.93141
1910	332.275	57.46	43.226	31.728	25.747	21.6222	0.583594	0.722463	1.38888	2.01391	0.927166	0.586274	0.723994	1.39189	2.05438	0.93193
1911	331.959	57.3976	43.228	31.73	25.75	21.7053	0.585687	0.721775	1.38779	2.05182	0.930057	0.585751	0.723348	1.39083	2.05263	0.931125
1912	334.52	57.4123	43.228	31.73	25.751	21.7	0.589595	0.727344	1.39873	2.06443	0.936708	0.585947	0.723299	1.3909	2.05456	0.931334
1913	332.352	57.449	43.224	31.725	25.746	21.7563	0.584096	0.722566	1.38966	2.08256	0.931146	0.586042	0.723163	1.39076	2.05135	0.931154
1914	332.219	57.4025	43.223	31.722	25.743	21.6933	0.585739	0.722153	1.38911	2.0509	0.930347	0.586439	0.723298	1.39119	2.05871	0.93189
1915	331.891	57.396	43.224	31.723	25.744	21.734	0.585471	0.721439	1.38774	2.06917	0.93066	0.586385	0.723166	1.39107	2.0581	0.931756
1916	333.254	57.3922	43.226	31.725	25.746	21.6351	0.588115	0.724401	1.39343	2.02663	0.931993	0.58612	0.722765	1.39051	2.05742	0.931324
1917	332.825	57.42	43.23	31.728	25.75	21.7215	0.586372	0.723406	1.39187	2.06544	0.932321	0.586443	0.722946	1.39104	2.05294	0.931436
1918	331.65	57.3966	43.231	31.729	25.751	21.7016	0.585307	0.720853	1.38696	2.04754	0.929121	0.586268	0.722941	1.39118	2.05091	0.931235
1919	333.404	57.4127	43.231	31.727	25.751	21.7042	0.587739	0.72454	1.39476	2.05967	0.933684	0.586736	0.723624	1.39263	2.04997	0.931929
1920	333.078	57.4262	43.225	31.721	25.745	21.6855	0.586357	0.723831	1.3934	2.05121	0.931929	0.586236	0.722947	1.39151	2.0542	0.931428
1921	332.288	57.4402	43.228	31.724	25.748	21.6693	0.584513	0.722114	1.39009	2.03672	0.928934	0.585963	0.72282	1.3914	2.04945	0.930945
1922	334.207	57.4193	43.228	31.723	25.746	21.6951	0.588751	0.726221	1.39789	2.06256	0.935519	0.585294	0.722549	1.39102	2.05005	0.930398
1923	331.22	57.393	43.229	31.723	25.747	21.72	0.584615	0.719667	1.38562	2.05624	0.928488	0.585267	0.722569	1.39116	2.05116	0.930461
1924	332.529	57.4488	43.225	31.719	25.743	21.6522	0.584458	0.722512	1.3911	2.03218	0.92894	0.584904	0.722083	1.39038	2.04429	0.929584
1925	330.892	57.4752	43.228	31.722	25.746	21.7143	0.580625	0.718955	1.38425	2.0518	0.925288	0.585481	0.722724	1.39176	2.04474	0.930391
1926	333.585	57.42	43.226	31.718	25.743	21.7091	0.587546	0.724681	1.39575	2.06739	0.934128	0.585536	0.722679	1.3919	2.04121	0.930239
1927	331.657	57.43	43.228	31.719	25.745	21.6058	0.583821	0.72043	1.38792	2.00315	0.925791	0.58557	0.723036	1.39272	2.03841	0.930356
1928	334.498	57.4295	43.221	31.712	25.738	21.6385	0.588551	0.7266	1.39981	2.03989	0.934586	0.58631	0.723609	1.39398	2.04184	0.931379
1929	334.209	57.4092	43.227	31.717	25.744	21.644	0.589136	0.72591	1.39883	2.03784	0.934453	0.587047	0.724167	1.39531	2.04276	0.932273
1930	332.485	57.4384	43.226	31.716	25.742	21.6606	0.58485	0.722166	1.39138	2.03661	0.929307	0.586694	0.723553	1.39431	2.03911	0.931496
1931	334.518	57.409	43.226	31.715	25.741	21.6738	0.589644	0.726517	1.39989	2.0562	0.936101	0.5867	0.723518	1.39441	2.04362	0.931734
1932	332.894	57.4343	43.227	31.714	25.742	21.6987	0.585779	0.722865	1.39356	2.05828	0.931545	0.586409	0.722874	1.39336	2.04203	0.931083
1933	331.751	57.4006	43.225	31.712	25.74	21.678	0.585077	0.720384	1.38878	2.04179	0.928689	0.58608	0.722577	1.39299	2.04305	0.930765
1934	331.66	57.43	43.229	31.716	25.745	21.67	0.583867	0.720186	1.38863	2.03472	0.927461	0.586292	0.72259	1.39322	2.04712	0.931139
1935	332.565	57.4016	43.226	31.712	25.741	21.6429	0.586511	0.722088	1.39242	2.02877	0.930025	0.585986	0.722076	1.39241	2.04502	0.930534
1936	333.425	57.4254	43.221	31.705	25.735	21.6589	0.586835	0.723831	1.39625	2.04498	0.932227	0.585166	0.720989	1.3905	2.04058	0.929123
1937	332.7	57.4107	43.225	31.709	25.738	21.7104	0.58633	0.722255	1.39298	2.06513	0.931925	0.585379	0.721707	1.39204	2.04729	0.930069
1938	333.007	57.3955	43.225	31.709	25.738	21.66	0.587502	0.722923	1.39427	2.04149	0.931867	0.586184	0.722352	1.39344	2.04685	0.930976
1939	329.533	57.4221	43.219	31.701	25.732	21.668	0.580037	0.715256	1.38018	2.02716	0.921665	0.585252	0.721558	1.39211	2.04975	0.930061
1940	334.21	57.4703	43.226	31.708	25.738	21.7379	0.586568	0.725409	1.39954	2.08877	0.935314	0.585055	0.72134	1.39182	2.05044	0.929849
1941	333.884	57.3905	43.231	31.713	25.744	21.6354	0.589508	0.724701	1.39841	2.03163	0.933811	0.584476	0.720769	1.39094	2.04975	0.929112
1942	330.179	57.4593	43.227	31.707	25.739	21.7107	0.579982	0.716535	1.38312	2.04912	0.923615	0.584265	0.720444	1.39057	2.05139	0.928887
1943	332.835	57.4346	43.222	31.702	25.734	21.6746	0.585457	0.722298	1.39425	2.04979	0.930746	0.585632	0.721859	1.39345	2.05711	0.930954
1944	331.004	57.4336	43.222	31.701	25.734	21.7176	0.582279	0.718263	1.38681	2.06033	0.926768	0.585829	0.721918	1.39382	2.05368	0.93097
1945	332.16	57.39	43.22	31.697	25.73	21.685	0.586027	0.720646	1.39165	2.0529	0.93029	0.585774	0.722106	1.39441	2.06125	0.931471
1946	334.241	57.3963	43.224	31.701	25.734	21.6918	0.589602	0.725161	1.40037	2.06722	0.936132	0.586295	0.722505	1.39536	2.06244	0.932134
1947	334.603	57.4546	43.227	31.702	25.736	21.6846	0.587945	0.725819	1.40212	2.06475	0.935428	0.586688	0.723235	1.39693	2.0687	0.933178
1948	334.695	57.428	43.225	31.7	25.734	21.7202	0.589126	0.72602	1.40251	2.08467	0.937317	0.586687	0.723297	1.3972	2.06778	0.933188
1949	331.609	57.4245	43.22	31.695	25.73	21.7006	0.583632	0.719324	1.38981	2.05745	0.928255	0.585961	0.723116	1.39702	2.06813	0.93265
1950	335.336	57.4696	43.217	31.692	25.726	21.7216	0.588203	0.727411	1.4052	2.09357	0.938058	0.585038	0.722227	1.39547	2.06323	0.931273
1951	331.349	57.4475	43.221	31.695	25.73	21.6969	0.582276	0.718699	1.38872	2.05392	0.926835	0.584714	0.721717	1.39457	2.06398	0.930794
1952	331.689	57.4908	43.217	31.69	25.726	21.6915	0.580942	0.719374	1.39038	2.05535	0.926526	0.583821	0.720795	1.39291	2.06194	0.929556
1953	331.489	57.4274	43.216	31.689	25.725	21.6484	0.58314	0.718939	1.38954	2.03287	0.92649	0.583655	0.720497	1.39247	2.06217	0.929289
1954	333.045	57.4361	43.22	31.692	25.727	21.7047	0.585683	0.722253	1.39583	2.07	0.93208	0.583195	0.71947	1.39062	2.05482	0.92799
1955	331.807	57.4525	43.221	31.693	25.729	21.7225	0.582872	0.719567	1.39087	2.07045	0.92865	0.583071	0.719358	1.39057	2.05226	0.927729
1956	330.76	57.4244	43.228	31.699	25.736	21.72	0.58247	0.717235	1.38672	2.05901	0.926383	0.583742	0.719705	1.39138	2.05258	0.928405
1957	332.137	57.4233	43.229	31.7	25.736	21.67	0.584981	0.72022	1.39226	2.04216	0.928967	0.58482	0.720981	1.39401	2.06053	0.930318
1958	331.103	57.4661	43.229	31.699	25.737	21.6713	0.58141	0.717917	1.38839	2.03596	0.925005	0.586155	0.722269	1.39673	2.06059	0.932001
1959	332.925	57.437	43.225	31.694	25.732	21.687	0.585641	0.721803	1.39603	2.05761	0.931257	0.585956	0.722104	1.39659	2.05859	0.93169
1960	335.725	57.4263	43.217	31.686	25.725	21.7063	0.59068	0.727875	1.40801	2.08849	0.93988	0.586246	0.722343	1.39719	2.05757	0.931989
1961	337.346	57.3935	43.22	31.687	25.726	21.6526	0.595031	0.731263	1.4148	2.07043	0.943866	0.586407	0.722481	1.39768	2.05786	0.932216
1962	331.418	57.472	43.223	31.69	25.729	21.7	0.581476	0.718412	1.38994	2.05645	0.926473	0.586561	0.722855	1.39859	2.06501	0.932933
1963	331.647	57.4069	43.222	31.689	25.728	21.6873	0.584505	0.718908	1.3909	2.05192	0.928472	0.586389	0.722688	1.3984	2.06928	0.932949
1964	332.726	57.4082	43.216	31.682	25.722	21.6527	0.586109	0.721186	1.39566	2.04414	0.930561	0.585383	0.721247	1.39582	2.06563	0.931239
1965	332.456	57.4859	43.217	31.682	25.723	21.7386	0.582484	0.720538	1.39477	2.08601	0.930019	0.583501	0.719136	1.39187	2.06343	0.92862
1966	332.5	57.44	43.217	31.682	25.722	21.74	0.584441	0.720633	1.39471	2.08752	0.931373	0.583823	0.719019	1.39184	2.06456	0.928829
1967	331.245	57.4109	43.222	31.685	25.727	21.7127	0.583634	0.717789	1.38992	2.06292	0.927906	0.583813	0.718923	1.39186	2.06139	0.928621
1968	330.644	57.4323	43.226	31.689	25.73	21.7077	0.581862	0.716487	1.38716	2.05507	0.925536	0.583656	0.718893	1.39201	2.06444	0.928682
1969	331.154	57.4057	43.223	31.686	25.729	21.7186	0.583729	0.717592	1.38977	2.06433	0.927937	0.583805	0.718802	1.39198	2.05905	0.928464
1970	331.508	57.4068	43.226	31.687	25.729	21.6459	0.584431	0.718234	1.39102	2.02976	0.927013	0.584537	0.719068	1.39274	2.05495	0.928913
1971	332.803	57.4491	43.227	31.687	25.73	21.7018	0.58501	0.720976	1.39669	2.06546	0.930988	0.584918	0.719272	1.39322	2.05236	0.92916
1972	332.308	57.465	43.228	31.688	25.731	21.675	0.583529	0.719905	1.39461	2.04825	0.928495	0.585306	0.719485	1.39376	2.05174	0.929523
1973	333.53	57.37	43.227	31.686	25.73	21.68	0.589567	0.722489	1.39997	2.05883	0.934519	0.585376	0.720093	1.3951	2.05148	0.929956
1974	331.991	57.3812	43.225	31.685	25.728	21.6691	0.586298	0.719217	1.39328	2.04483	0.92963	0.584883	0.719365	1.39387	2.05162	0.929213
1975	331.449	57.4048	43.23	31.689	25.732	21.6913	0.584575	0.717982	1.39101	2.05069	0.928079	0.584543	0.718839	1.39299	2.05083	0.92864
1976	333.263	57.49	43.229	31.687	25.732	21.6925	0.58422	0.721847	1.39909	2.06252	0.930966	0.584866	0.718865	1.39317	2.05269	0.928971
1977	329.297	57.4018	43.232	31.688	25.733	21.6791	0.580984	0.713135	1.38244	2.03074	0.921814	0.583736	0.718108	1.39181	2.04739	0.927518
1978	331.218	57.4362	43.224	31.68	25.725	21.7052	0.58263	0.717295	1.3905	2.05994	0.926978	0.583121	0.717809	1.39147	2.05023	0.927112
1979	332.509	57.4196	43.229	31.685	25.73	21.6971	0.58579	0.720091	1.39592	2.06125	0.930812	0.583221	0.717942	1.39191	2.05196	0.927368
1980	331.197	57.4641	43.229	31.684	25.729	21.6336	0.581656	0.717187	1.39041	2.02178	0.924344	0.583323	0.717676	1.39156	2.04932	0.927148
1981	331.198	57.4509	43.224	31.678	25.725	21.7148	0.581994	0.717128	1.39089	2.06472	0.926789	0.583783	0.718271	1.39289	2.05215	0.927979
1982	332.023	57.4064	43.224	31.678	25.724	21.7	0.585274	0.718913	1.39412	2.06277	0.92987	0.58429	0.718367	1.39319	2.04986	0.928255
1983	332.574	57.4382	43.224	31.676	25.723	21.6555	0.584933	0.719981	1.39666	2.04407	0.929425	0.58417	0.718218	1.39311	2.04746	0.927985
1984	331.337	57.401	43.222	31.674	25.722	21.6824	0.584206	0.717304	1.39171	2.05055	0.927633	0.584376	0.718306	1.39351	2.05332	0.928498
1985	331.614	57.37	43.227	31.68	25.727	21.6709	0.586181	0.717966	1.39263	2.04393	0.928915	0.584469	0.718365	1.39378	2.04963	0.928423
1986	332.201	57.4209	43.223	31.673	25.721	21.6586	0.584948	0.719051	1.39534	2.04438	0.928916	0.584024	0.718032	1.39332	2.04451	0.927688
1987	331.652	57.4403	43.221	31.67	25.719	21.6997	0.5831	0.717799	1.39326	2.06285	0.927939	0.584035	0.718113	1.39362	2.04457	0.927766
1988	331.535	57.4445	43.219	31.668	25.717	21.6518	0.582639	0.717545	1.39277	2.03887	0.926262	0.583929	0.718199	1.39394	2.04577	0.927831
1989	331.086	57.44	43.222	31.671	25.72	21.6364	0.582161	0.716575	1.39089	2.02691	0.924728	0.584041	0.718218	1.39418	2.04643	0.92797
1990	332.954	57.4555	43.227	31.675	25.724	21.6527	0.585014	0.720554	1.39873	2.04453	0.929967	0.583936	0.717913	1.39375	2.0475	0.927784
1991	331.757	57.4391	43.224	31.671	25.721	21.6927	0.58346	0.717903	1.39394	2.05893	0.928087	0.583824	0.717614	1.39331	2.04352	0.927336
1992	331.85	57.3612	43.227	31.674	25.724	21.6742	0.586964	0.718103	1.39433	2.04857	0.929891	0.583789	0.716942	1.39214	2.04084	0.926765
1993	331.327	57.4073	43.229	31.675	25.726	21.6891	0.584217	0.71691	1.39237	2.05186	0.927615	0.583321	0.716284	1.39101	2.0412	0.926089
1994	330.8	57.43	43.228	31.673	25.724	21.66	0.582312	0.715707	1.39015	2.03494	0.924797	0.582363	0.71478	1.38828	2.03869	0.924425
1995	329.475	57.3782	43.235	31.68	25.731	21.6536	0.582393	0.712842	1.38458	2.02015	0.922266	0.582324	0.714349	1.38754	2.03517	0.923958
1996	329.1	57.4426	43.23	31.674	25.725	21.6709	0.578887	0.711968	1.38301	2.02941	0.92	0.582571	0.714842	1.38866	2.03855	0.924617
[truncated: 1,003 more rows]

## Sheet: KD-2 Based Data
Time	Thermal Conductivity
min	W/(m.K)
0	0.748
300	0.749
600	0.718
900	0.689
1200	0.647
1500	0.626
1800	0.62
2100	0.623
2400	0.632
2700	0.643
3000	0.651
			Fig: Thermal Conductivity from KD-2 Pro during Heating Test

## Sheet: Temp Profiles
	Temperature Profile
	time, min	Distance from Cold Plate, cm
		10	7.5	5	2.5	0
	t = 0	23.27	22.033	21.877	22.06	23.38
	t = 25	54.9657	37.472	26.485	22.215	21.0886
	t = 50	56.305	42.757	32.15	25.182	21.4467
	t = 100	57.03	45.741	36.396	28.036	21.83
	t = 154	57.1286	46.308	37.364	28.696	21.8571
	Steady	57.4418	43.1872	31.3377	25.5638	21.633
